# Supplementary material for: Prevalence and profile of adverse drug reactions in high-risk pregnancy: a cohort study
Source: BMC Pregnancy Childbirth. 2019 Jun 11;19:199. doi: 10.1186/s12884-019-2321-8 (PMC6560812; doi:10.1186/s12884-019-2321-8)
Supplement: Supplementary file 1 — ADR study database in pregnant women. The database that supports our findings in this study is presented as an additional file. (XLSX 386 kb) [file 12884_2019_2321_MOESM1_ESM.xlsx]

## Sheet: bio
pac	idade	tempo	ig	nget	nabor	medgra	has	dm	parto	pielo	doutros	nmed	nint	nintdx	ram	pesq
1	23	18	36	4	1	POLIVITAMINICO ESCOPOLAMINA PARACETAMOL INSULINA	1	1	1	0	1	8	0	1	1	2
2	19	3		1	0	CEFALEXINA	1	0	0	1	0	6	1	0	1	2
3	22	5	34	1	0	DIPIRONA ESCOPOLAMINA	0	0	1	0	0	9	1	1	1	2
4	20	2	29	2	0	DIPIRONA ESCOPOLAMINA	0	0	1	1	0	3	0	0	0	2
5	26	2		2	1	SULFATO FERROSO	1	0	0	0	1	2	0	0	0	2
6	17	5	36	2	0		1	0	0	1	1	12	1	0	0	2
7	24	5	32	5	1		0	0	1	0	1	3	0	0	0	2
8	18	6		1	0		1	0	0	0	1	11	6	4	0	2
9	20	11	37	2	1	SULFATO FERROSO	1	0	0	0	1	4	2	1	0	2
10	30	4		1	0	GLIBENCLAMIDA INSULINA NPH INSULINA REGULAR	0	1	0	0	1	7	2	0	0	2
11		1	24	2	0		0	0	1	0	0	3	0	0	0	2
12	41	4	35	3	1		0	0	0	0	1	2	0	0	0	2
13	32	5	27	4	1	INSULINA SULFATO FERROSO	0	1	0	0	1	4	0	0	0	2
14	32	2	39	1	0	SULFATO FERROSO INSULINA ALENIA	0	1	0	0	0	6	1	1	0	2
15	23	5	37	3	1		1	0	0	0	1	5	2	0	0	2
16	17	2	36	3	2		0	0	0	0	1	5	1	0	0	2
17	21	5	35	2	0		1	0	0	0	0	6	0	0	0	2
18	25	4		1	0		1	0	0	0	1	5	1	0	0	2
19	23	5	32	3	1	XAROPE PARA TOSSE	1	0	1	0	0	9	2	2	0	2
20	33	2	53	3	0	ULTRAGESTON INIBINA SULFATO FERROSO	0	0	1	0	0	3	0	0	0	2
21	28	1		1	0		0	0	0	0	1	4	0	0	0	2
22	30	7		2	0		1	0	0	0	0	8	2	1	0	2
23	53	1				LOSARTANA HIDROCLOROTIAZIDA PROPANOLOL LEVOTIROXINA SINVASTATINA	0	0	0	0	1	3	2	1	0	2
24	22	3	28	3	1	ESCOPOLAMINA	0	0	1	1	0	7	0	0	0	2
25	35	9	36	4	1		1	0	1	0	1	6	1	0	0	2
26	41	1	35	4	1	SULFATO FERROSO METILDOPA	1	1	0	0	0	2	0	0	0	2
27	16	2	36	1	0	METLDOPA	1	0	0	0	1	6	1	0	0	2
28	27	7		10	1	METLDOPA	1	0	0	0	1	5	0	0	0	2
29	36	2	38	3	0	METLDOPA	1	1	0	0	1	5	3	0	0	2
30	28	3	33	11	9	SULFATO FERROSO ACIDO FOLICO	0	0	0	0	1	3	1	1	0	2
31	27	3	38	1	0	LEVOTIROXINA DAMATER	1	0	0	0	1	6	1	0	0	2
32	36	39	28	2	2	SULFATO FERROSO ACIDO FOLICO	0	1	0	1	1	8	1	1	0	2
33	23	3	28	2	1	SULFATO FERROSO	1	0	1	1	0	4	0	0	0	2
34	30	2		2	0	SULFATO FERROSO ACIDO FOLICO METILDOPA	0	0	0	0	1	2	0	0	0	2
35	30	34	31	4	1	LEVOTIROXINA	0	0	1	0	1	8	3	1	1	2
36	30	2	32	2	0	METLDOPA NATELLE OMEGA 3	1	0	1	0	1	5	1	1	1	2
37		9			0		0	0	0	0	1	10	7	4	0	2
38	17	3	32	1	0	SULFATO FERROSO ESCOPOLAMINA	0	0	0	0	1	1	0	0	0	2
39	30	7	28	2	0	DIPIRONA	0	0	0	1	1	4	0	0	0	2
40	20	2					0	0	0	0	1	2			0	2
41	40	8	32	4	0		1	0	0	0	0	8	3	1	0	2
42	35	4	32	2	0	METILDOPA	1	0	1	0	1	9	2	1	0	2
43	32	7	20	4	1	INSULINA	0	1	0	1	0	5	0	0	0	2
44	17	4	32	1	0		0	1	1	0	1	4	0	1	0	2
45	21	3	28	1	0		0	1	1	0	0	4	0	0	0	2
46	26	1		1	1	METILDOPA	1	0	0	0	1	3	0	0	0	2
47	41	3	34	4	1		0	1	1	0	1	5	0	0	0	2
48	19	2	39	1	0	METILDOPA	1	0	1	0	0	3	1	0	0	2
49	32	1	32	2	1	METILDOPA CEFALEXINA ITU	1	0	1	0	1	3	1	0	0	2
50	29	1	3	8	5	SULFATO FERROSO ACIDO FOLICO PROGESTAN	0	0	0	0	1	1	0	0	0	2
51	38	3	38	5	1	METILDOPA INSULINA	1	1	0	0	0	8	5	1	0	1
52	16	1	32			SOTALOL	1	0	0	0	0	4	2	0	0	1
53	35	2	38	1	2	METILDOPA	1	0	0	0	0	5	1	0	0	1
54	21	4	36	1		SULFATO FERROSO	1	0	0	0	0	7	1	0	0	1
55	25	3	32	3	1		1	0	0	0	0	4	1	0	0	1
56	23	10	34	2	1	COMBIRON	1	0	0	1	1	8	2	0	0	1
57		2					0	1	0	0	0	3	0	0	0	1
58	32	9	35	1		LEVOTIROXINA	0	0	0	0	1	2	0	0	0	1
59	30	3	36	3		SULFATO FERROSO	0	1	0	0	0	3	0	0	0	1
60	15	3	28	1		SULFATO FERROSO ACIDO FOLICO	0	0	1	0	1	2	0	0	0	1
61	20	3	36	3	1	MEDICAMENTOS PARA DOR	0	0	0	0	0	3	1	0	0	1
62	15	2	28	1			1	0	0	0	1	4	0	0	0	1
63	39	2	36	1		METILDOPA SULFATO FERROSO	1	0	0	0	1	3	1	0	0	1
64	40	3	28	2		SULFATO FERROSO ACIDO FOLICO	0	0	1	0	0	3	1	1	0	1
65	33	1	40	3	1	METILDOPA	1	0	0	0	0	3	1	0	0	1
66	24	7	30	2		COMBIRON	0	0	1	0	1	4	1	1	0	1
67	28		32	2		SULFATO FERROSO	0	0	1	1	1	7	1	1	0	1
68	28	1	32	3			0	0	0	0	1	2	0	0	0	1
69	31	1	12	5	1	ULTROGESTAN	0	0	0	0	1	2	0	0	0	1
70	22	2	38				1	0	0	0	0	4	1	0	0	1
71	19	1	28	1		ACIDO FOLICO SULFATO FERROSO	0	0	0	0		2	0	0	0	1
72	26	10		2			0	0	0	1	1	9	3	2	0	1
73	30	6	32	6	5	ENOXAPARINA	1	0	0	0	1	4	1	0	0	1
74	26	2	40	2		PURAN T4	0	1	0	0	1	6	1	0	0	1
75	19	17	32	1		METILDOPA	1	0	0	0	1	8	1	0	0	1
76	16	2	34	1		NATELE	0	0	1	0	1	3	0	0	0	1
77	23	2	32	2		METILDOPA	1	0	0	0	1	6	1	0	0	1
78	28	1		4	2	LEVOTIROXINA CARVEDILOL	1		0	0	1	4	2	0	0	1
79	33	1	40	5	3		1	1	0	0	1	4	1	0	0	1
80	22	2	28	1		ACIDO FOLICO SULFATO FERROSO	0	0	1	0	1	3	0	0	0	1
81	32	3	33	1		SULFATO FERROSO	0	0	1	0	1	4	1	1	0	1
82	18	2	32	1		ACIDO FOLICO SULFATO FERROSO	0	0	1	0	1	3	0	0	0	1
83	28	2	32	5	1	INSULINA	0	1	0	0	1	3	1	0	0	1
84	25	3	36	2		SULFATO FERROSO OMEPRAZOL	1	0	0	0	1	6	1	0	0	1
85	36	2	32	1			1	0	1	0	1	4	1	1	0	1
86	23	2	29	3			0	0	0	0	1	3	0	0	0	1
87		2										4	3	2	0	1
88	41	3		2	1	SULFATO FERROSO	1	0	0	0	1	3	1	0	0	1
89	23	2	32	3		SULFATO FERROSO	0	0	1	0	0	3	0	0	0	1
90	16	3	20	2		ACIDO FOLICO SULFATO FERROSO	0	0	1	0	0	4	1	1	0	1
91	38	1	40	3	1	CEFALEXINA	0	1	0	0	0	3	0	0	0	1
92	35	2	24	5	1	INSULINA	0	1	0	0	0	4	1	0	0	1
93	28	2		4		SULFATO FERROSO	0	0	0	0	1	3	1	0	0	1
94	15	3	32	1		SULFATO FERROSO	0	0	1	0	0	4	1	1	1	1
95	25	7	32	1			1	0	0	0	1	6	0	0	1	1
96	18	5	32	1			1	0	0	0	1	4	1	0	1	1
97	15	2		2			1	0	0	0	1	7	3	1	0	1
98	17	1	24	2			0	0	1	0	1	2	0	0	1	1
99	29	4	37	2		PURAN	0	1	0	0	1	7	2	0	0	1
100	37	2				METILDOPA	1	0	0	0	1	3	0	0	0	1
101	23	2		1		METILDOPA SULFATO FERROSO	1	0	0	0	0	3	1	0	0	1
102	33	8	33	3	1	MATERNA	0	1	1	0	1	3	1	0	0	1
103		1										3	0	0	0	1
104		1	41	3	1	SULFATO FERROSO	1	0	0	0	1	4	1	0	0	1
105	25	4	32	13	10	CARBAMAZEPINA FENOBARBITAL SULFATO FERROSO	0	0	0	0	1	6	4	1	0	1
106	40	11	28	3	1	METILDOPA METFORMINA	0	1	0	0	0	5	1	0	0	1
107	33	2	35	4	1	METILDOPA	1	0	0	0	1	3	1	0	0	1
108	35	2	32	5	2	ACIDO FOLICO SULFATO FERROSO	0	0	0	0	1	2	0	0	1	1
109	41	5	32	4	1	CEFALEXINA	1	1	1	0	0	5	0	0	0	1
110	23	2	30	4	2	QUETIAPINA DACTIL OB SULFATO FERROSO	0	0	1	0	1	6	1	1	0	1
111	30	1		3	1	SULFATO FERROSO	1	1	0	0	0	4	2	0	0	1
112	31	16	24	2		METILDOPA SULFATO FERROSO	1	1	1	0	0	9	5	0	0	1
113	34	1	36	3		ACIDO FOLICO SULFATO FERROSO	0	0	0	0	1	1	0	0	0	1
114	30	14	33	2		FORMOTEROL SILDENAFIL FUROSEMIDA ACIDO ACETIL SALICILICO	1	0	1	0	1	6	1	0	0	1
115	33	15	30	1			1	0	0	0	0	10	0	0	0	1
116	19	3		1		METILDOPA	1	0	0	0	0	4	0	0	0	1
117	18	1	37	1		SULFATO FERROSO	1	0	0	0	1	3	0	0	0	1
118	25	3	39	1		METILDOPA	1	1	0	0	1	5	2	0	0	1
119	22	1				ACIDO FOLICO SULFATO FERROSO MATERNA METILDOPA	1	0	0	0	0	4	1	0	0	1
120	16	1	36	1		SULFATO FERROSO	0	0	1	0	0	1	0	0	1	1
121	15	2	36	1		CARVEDILOL	1	0	0	0	1	4	2	0	0	1
122	23	11	28	3		CARBAMAZEPINA ACIDO FOLICO ULTROGESTAN	0	0	1	0	1	9	3	2	0	1
123	18	2	37	1		SULFATO FERROSO ACIDO FOLICO	1	0	1	0	1	3	0	0	0	1
124	41	2	36	3			1	0	0	0	1	5	1	0	0	1
125	25	12	29	4	1	METILDOPA	1	0	1	0	0	4	1	0	1	1
126	28	1		1		METILDOPA	1	0	0	0	0	4	1	0	0	1
127	31	1		2			1	0	0	0	0	4	1	0	0	1
128	24	4	32	1			1	0	0	0	0	8	3	0	0	1
129	17	5	32	1			1	0	0	0	0	7	1	0	0	1
130	18	3	24	1		SALBUTAMOL	0	0	0	0	1	2	0	0	0	1
131	20	3	39	1		METILDOPA	1	0	0	0	0	3	1	0	0	1
132	33	5	32	5		ANTICONVULSIVANTE	0	0	0	0	1	8	7	0	0	1
133	14	1				METILDOPA	1	0	0	0	0	5	1	0	0	1
134	30	10	28	2	1	SULFATO FERROSO ACIDO FOLICO	1	0	0	0	0	12	10	2	0	1
135	31	1		2		PURAN METILDOPA	1	0	0	0	0	4	1	0	0	1
136	38	5	30	5		URSACOL PINDOLOL NIFEDIPINO	1	0	0	0	1	5	1	0	0	1
137	18	1	42	2	1	ANTIHIPERTENSIVO	1	0	0	0	1	3	1	0	0	1
138	19	5	27	1		FENOBARBITAL ACIDO FOLICO	0	0	1	0	1	10	1	0	1	1
139	19	5	34	1		SULFATO FERROSO ACIDO FOLICO DRAMIN B6	1	0	0	0	0	8	3	0	1	1
140	27	14	28	3		INSULINA	1	1	0	0	1	10	6	0	1	1
141	30	5	32	2	1	SULFATO FERROSO METILDOPA ACIDO FOLICO	1	1	0	0	1	3	0	0	1	2
142	16	5	3	1	0	SUFATO FERROSO ACIDO FOLICO	0	0	0	1	0	7	0	0	1	2
143	22	1	36	1	0	DIFERIN	0	0	0	0	1	1	0	0	1	2
144	17	5	20	2	0		0	0	0	1	0	3	0	0	1	2
145	38	3	37	5	2	METILDOPA	1	0	0	0	1	3	0	0	1	2
146	34	1	35	4	1		0	0	1	0	1	1	0	0	0	2
147	35	14	32	4	0	METILDOPA	1	0	0	0	1	11	11	2	1	2
148	41	3	38	8	3		0	1	1	0	1	3	0	0	0	2
149	20	3	27	1	0	PARACETAMOL	0	0	0	1	0	5	0	0	0	2
150		3	28	1	0		0	0	1	0	0	3	0	0	0	2
151	24	2	33	1	0	SULFATO FERROSO ACIDO FOLICO	1	0	0	0	1	7	1	0	0	2
152	17	2	32	1	0	INJEÇAO PARA O PULMAO DO BEBE OUTRO PARA DIMINUIR CONTRAÇAO	0	0	1	0	0	2	0	0	0	2
153	21	2	24	1	0	SULFATO FERROSO	1	0	0	0	1	4	1	0	0	2
154	17	4	35	1	1		0	0	0	0	1	3	0	0	1	2
155	22	2	35	1	0	CEFALEXINA	0	0	1	1	0	3	0	0	1	2
156	23	1	32	2	0	SULFATO FERROSO ACIDO FOLICO	0	0	0	0	1	1	0	0	0	2
157		1	34	1	0		0	0	1	0	0	3	0	0	0	2
158		1					0	0	0	0	1	4	1	0	0	2
159		3	24	2	0	SULFATO FERROSO ACIDO FOLICO HIDROXICLOROQUINA AAS PREDNISONA INSULINA	0	1	1	0	1	10	1	0	1	2
160		1	35	1	0		0	0	0	0	1	2	0	0	0	2
161	32	2	32	4	1	SULFATO FERROSO ACIDO FOLICO	0	0	1	0	0	4	1	1	0	2
162	16	2	31	1	0	INIBINA	0	0	1	0	1	3	0	0	0	2
163	19	6	32	1	0	MATERNA	0	0	1	0	1	4	1	1	0	2
164		2	36	3	0		0	0	0	0	1	3	0	0	0	2
165	30	3	35	1	0	METILDOPA INSULINA	1	1	0	0	0	6	2	0	0	2
166	31	5	28	2	1	SULFATO FERROSO VITAMINA D	0	0	1	0	1	2	0	0	0	2
167	20	4	33	1	0	SULFATO FERROSO	0	0	1	0	0	5	1	1	0	2
168	18	2	31	2	1		0	0	0	0	1	3	0	0	0	2
169	36	2	34	4	0	METILDOPA	1	0	0	0	0	6	1	1	0	2
170	23	2		2	0		1	0	0	0	1	4	1	0	0	2
171	18	7		1	0		1	0	0	0	1	6	0	0	0	2
172	25	9	32	2	0	ESCOPOLAMINA	0	0	1	1	1	8	1	1	0	2
173	17	2	36	1	0	BEZETACIL	0	0	1	0	0	3			0	2
174	32	3	34	2	0	BEZETACIL PARACETAMOL ESCOPOLAMINA NIMESULIDA FLUOXETINA	0	0	1	0	1	6			0	2
175	25	9	20	2	0		1	0	0	0	1	10	1	0	0	2
176	35	1	32	1	0	METLDOPA	1	0	0	0	1	2			0	2
177	17	7	31	4	3		0	0	1	1	1	5	0	0	0	2
178	32	2	36	2	0	METILDPA INSULINA NPH	1	1	0	0	1	4	2	1	0	2
179	20	5	32	2	1	SULFATO FERROSO ACIDO FOLICO	0	0	1	0	1	6	0	0	0	2
180	19	2	19	1	0		0	0	1	1	0	2			0	2
181	21	12	36	3	0	METILDOPA ACIDO FOLICO	1	1	0	0	0	8	0	0	0	2
182	33	7	36	3	0	CARVEDILOL	1	0	0	0	0	3	0	0	0	2
183		2	28	4	0	CARBAMAZEPINA FENITOINA FENOBARBITAL	0	0	0	0	1	9	6	2	0	2
184	33	2		4	1	FLUOXETINA AMIODARONA	1	1	0	0	1	4	2	2	0	2
185	30	2	34	5	0	ACIDO FOLICO RANITIDINA	1	0	0	0	0	3	0	0	0	2
186	30	5	24	3	0		1	0	0	0	1	10	2	1	1	2
187	26	3	35	2	0	ESCOPOLAMINA	0	0	0	1	1	7	1	0	0	2
188	20	1	32	1	1	SULFATO FERROSO	1	0	0	0	0	4	1	0	0	2
189		2					1	0	0	0	0	7	6	2	0	2
190	31	5	34	3	0	METILDOPA	1	0	1	0	1	3	0	0	0	2
191	20	1	20	3	1	INSULINA NPH	0	1	0	0	0	4	0	0	0	2
192	35	2	29	2	0	SULFATO FERROSO ACIDO FOLICO	0	0	1	0	0	3	0	0	0	2
193	39	3	39	1	0	METILDOPA	1	1	0	0	1	4	1	0	0	2
194	36	12	32	8	4	SULFATO FERROSO INSULINA REGULAR INSULINA NPH	1	1	1	0	0	11	3	0	1	2
195	30	16	36	3	1		0	1	0	0	1	3	1	1	0	2
196	19	4	24	1	0	SULFATO FERROSO ACIDO FOLICO	0	0	1	0	0	4	0	0	1	2
197	33	4	34	1	0	SULFATO FERROSO	0	0	0	0	1	6	1	1	0	2
198	29	1	38	6	0	SULFATO FERROSO ACIDO FOLICO METILDOPA	1	0	0	0	0	3	1	0	0	2
199	21	3	41	2	1	METILDOPA	1	0	0	0	1	3	1	0	0	2
200		1	36			METILDOPA	1	0	0	0	1	5	1	0	0	2
201	25	3	38	2			0	0	1	0	0	3	1	0	0	1
202	31	3	32	8	5	HALOPERIDOL AMITRIPTILINA CLONAZEPAM	0	0	0	0	1	9	2	1	0	1
203	28	2	36	1		MEDICAMENTO DE PRESSAO	1	0	1	0	0	6	0	0	0	1
204	32	6	34	2		ULTROGESTAN	0	0	0	0	0	3	0	0	0	1
205	41	3	29	4	1		0	1	1	0	0	5	1	1	0	1
206	39	2	39	3	1	FENOBARBITAL METILDOPA SULFATO FERROSO VIFERRIN	1	0	0	0	1	3	1	0	0	1
207	22	6	12	2		CEFALEXINA SULFATO FERROSO	0	0	0	1	0	4	0	0	0	1
208	29	2	28	2		ACIDO FOLICO VITAMINAS	1	0	0	0	0	3	0	0	0	1
209	27	5	31	1		SULFATO FERROSO	0	0	1	0	0	4	1	1	0	1
210	26	6	36	3	1	METILDOPA	1	0	0	0	1	3	0	0	0	1
211	23	2	32	2			1	0	0	0	0	3	0	0	0	1
212	31	2	29	4		ESCOPOLAMINA	0	0	1	0	0	3	0	0	0	1
213	22	7	34	2	1	SULFATO FERROSO ACIDO FOLICO PARACETAMOL	0	1	1	0	0	7	2	1	0	1
214	22	4	36	1			0	0	0	0	0	2	0	0	0	1
215	29	1	36	2		COMBIRON	0	0	0	0	0	1	0	0	0	1
216	24	1	36	3			1	0	0	0	0	2	0	0	0	1
217	25	9	37	4	1	SULFATO FERROSO ACIDO FOLICO	0	1	0	0	0	4	1	0	0	1
218	19	2	35	1			1	0	0	0	0	7	1	0	0	1
219	21	5	38				0	0	0	0	1	7	2	0	0	1
220	36	2	32	4	1		1	0	0	0	0	2	0	0	0	1
221	28	5	32	2		METILDOPA NIFEDIPINO PINDOLOL	1	0	0	0	1	3	1	0	0	1
222		4	34	4			1	0	1	0	1	6	3	1	0	1
223		1					1	0	1	0	1	3	1	0	0	1
224	15	4	36	1			1	0	0	0	1	5	1	0	0	1
225	40	1					0	0	0	0	1	7	1	1	0	1
226	21	2	28	2			0	0	1	0	1	3	2	2	0	1
227		2	24				0	1	0	0	1	3	0	0	0	1
228	29	37	22	2		PREDNISONA ACIDO ACETILSALICILICO SULFATO FERROSO ACIDO FOLICO	0	1	0	0	1	11	8	4	0	1
229	35	3	27	3	1	SULFATO FERROSO ACIDO FOLICO	0	0	1	0	1	3	0	0	0	1
230	46	3	32	12			1	0	0	0	1	5	2	0	0	1
231	25	1	36	2		SULFATO FERROSO ACIDO FOLICO	0	1	0	0	0	2	0	0	0	1
232	32	2	37	2		METILDOPA INSULINA NPH	1	1	1	0	0	4	1	0	0	1
233	19	2	37	1			1	0	0	0	0	4	0	0	0	1
234	28	15	28	4		METILDOPA	1	0	0	0	1	11	6	0	0	1
235	19	2	28	1			0	0	1	0	1	1	0	0	0	1
236	26	3	39	2		SULFATO FERROSO METILDOPA	1	0	0	0	1	5	0	0	0	1
237	22	5	28	4		SULFATO FERROSO	0	0	1	0	1	2	0	0	0	1
238	25	2	34	1		METILDOPA	1	0	0	0	1	4	1	0	0	1
239	36	1		6	2	INSULINA	0	1	0	0	1	6	0	0	0	1
240	36	13		4		INSULINA NPH	1	1	0	0	1	8	3	0	0	1
241	30	5	32	4		CIPROFLOXACINO	1	0	0	0	1	6	1	0	0	1
242		1					0	0	0	0	0	4	1	0	0	1
243	34	3	16	2			1	0	0	0	0	4	0	0	1	1
244	29	24	33	2		METILDOPA SULFATO FERROSO	1	0	1	0	1	11	1	1	2	1
245	18	14	34	1		COMBLEXO B SULFATO FERROSO ACIDO FOLICO INIBINA	0	0	1	0	1	6	1	1	1	1
246	20	2	32	2		METILDOPA	1	0	0	0	1	4	1	0	1	1
247	20	2	32	3	2	SULFATO FERROSO ACIDO FOLICO	0	0	0	1	1	4	0	0	0	1
248	22	2	34	3		FENOBARBITAL	1	0	1	0	1	7	4	2	0	1
249	25	5	28	3	1		0	0	1	0	1	6	1	1	0	1
250	29	1		4		CAPTOPRIL	1	0	0	0	1	4	1	0	0	1
251	27	2	33	3		DICLOFENACO	0	0	1	0	1	3	0	0	0	1
252	35	2	28	8	1		0	0	0	0	1	5	0	0	0	1
253	37	4	25	3		SULFATO FERROSO	0	0	1	0	1	3	2	2	0	1
254	27	2	35	3		SULFATO FERROSO ACIDO FOLICO	0	0	1	0	1	1	0	0	0	1
255	34	2	32	2	1	CEFALIUM	1	0	1	0	1	2	0	0	0	1
256	14	1	32	1		SULFATO FERROSO ACIDO FOLICO	0	0	1	0	1	2	0	0	0	1
257	17	2	36	1			1	0	0	0	1	3	0	0	0	1
258	18	3	33	2		METILDOPA	1	0	1	0	1	2	0	0	0	1
259	35	7	34	2		PREDNISONA	1	0	0	0	1	7	6	3	1	1
260	28	9	32	3	1	INSULINA SULFATO FERROSO	1	1	0	0	1	9	3	0	0	1
261	19	4	28	1		SULFATO FERROSO	0	0	1	0	1	3	0	0	0	1
262	22	2	28	4		SULFATO FERROSO	0	0	1	0	1	3	0	0	0	1
263	26	2	4	5	2		0	0	0	1	1	1	0	0	0	1
264	27	5		4	1	METILDOPA	1	0	0	0	0	8	1	0	1	1
265	24	5	37	3	2	ENOXAPARINA	0	0	0	0	1	4	3	3	0	1
266	28	8	32	3		METILDOPA	1	0	0	0	0	8	7	2	1	1
267	30	10	32	2		METILDOPA NIFEDIPINO SULFATO FERROSO INSULINA NPH	1	1	1	0	0	12	5	1	1	1
268	24	6	37	1			0	0	1	1	0	4	0	0	1	1
269	33	6	28	7		CEFALEXINA SULFATO FERROSO	0	1	1	0	1	5	1	1	1	1
270	20	3		1			1	0	0	0	1	9	1	0	2	1
271	41	1	37	2		GALVUS MET INSULINA NPH METILDOPA	1	1	0	0	1	5	1	0	0	1
272	16	8	12	1			0	0	0	0	1	7	1	1	0	1
273	24	7	9	3			0	0	0	1	1	3	0	0	1	1
274	29	2	34	8	3	SULFATO FERROSO ACIDO FOLICO	1	0	1	0	0	2	0	0	0	1
275	39	1	32	3		METILDOPA	1	0	0	0	1	5	0	0	0	1
276	30	1					0	0	0	0	1	2	1	1	0	1
277	24	6	25	2			0	0	0	0	1	5	0	0	1	1
278	27	1		2	1	LEVOTIROXINA	1	1	0	0	1	4	1	0	0	1
279	35	9	32	2		METILDOPA BRIMONIDINA	1	0	0	0	1	6	1	0	0	1
280	36	7		4		INSULINA NPH	0	1	0	0	1	8	5	1	1	1
281	16	7	24	1			0	1	0	0	1	8	0	0	1	1
282	18	8	32	2		SULFATO FERROSO ACIDO FOLICO	1	0	1	0	1	7	2	1	1	1
283	20	9	34	2	1	METILDOPA SULFATO FERROSO ACIDO FOLICO ESCOPOLAMINA	1	0	1	0	1	10	1	0	0	1
284		5	36	2			1	0	0	0	1	3	0	0	0	1
285	32	11	33	3		METILDOPA INSULINA NPH	1	1	0	0	1	5	1	0	0	1
286	29	4	32	1			1	0	0	0	0	7	4	2	0	1
287	22	2	20				0	0	0	0	1	7	0	0	0	1
288	27	2		4		METILDOPA SULFATO FERROSO	1	0	0	0	0	5	3	1	0	1
289	22	2	39	3			1	1	0	0	1	6	2	0	0	1
290	34	2	32	2		SULFATO FERROSO	0	0	1	0	1	3	0	0	0	1
291	29	1	27	1		ANLODIPINO	1	0	0	0	1	3	1	0	0	1
292	33	6	34			BUSCOPAM AMOXICILINA	0	0	0	0	1	6	0	0	1	1
293	20	6					0	0	0	0	1	4	0	0	0	1
294	24	23	32	4	2	METILDOPA	1	0	0	0	1	5	0	0	1	1
295	24	2	28	1			1	0	0	0	1	4	1	0	0	1
296	16	1		4		INSULINA NPH	0	1	0	0	1	3	0	0	0	1
297	20	1	31	2		SULFATO FERROSO ACIDO FOLICO	0	0	1	0	1	3	1	1	0	1
298	17	1	36	1		SULFATO FERROSO ACIDO FOLICO	0	0	0	0	1	1	0	0	0	1
299	22	2	36	4			1	1	0	0	1	5	2	0	0	1
300	18	8	35	1		SULFATO FERROSO	0	0	1	0	1	6	0	0	0	1
301	17	2	32	1	0	SULFATO FERROSO	0	0	1	0	0	3	0	0	0	2
302	17	10	24	2	1	BETAMETASONA BUSCOPAM	0	0	1	0	1	7	0	0	1	2
303	20	2	24	1	0	SULFATO FERROSO	0	0	1	0	1	3	0	0	1	2
304	17	3	24	1	0	ULTRAGESTON	0	0	1	0	0	3	0	0	1	2
305	22	9	19	1	0	PREDNISONA AMOXILINA DIPIRONA	0	0	0	0	1	7	0	0	1	2
306	32	2		3	1	ALENIA	1	0	0	0	0	4	0	0	0	2
307	24	1	36	4	0	SULFATO FERROSO ACIDO FOLICO METILDOPA	1	1	0	0	1	4	0	0	1	2
308	26	7	32	3	1	BETAMETASONA	0	0	0	0	1	3	0	0	0	2
309	36	7	38	3	1	METILDOPA DIPIRONA	1	1	0	0	0	8	2	0	1	2
310	31	4	37	3	1	SULFATO FERROSO FLUOXETINA CLORPROMAZINA INSULINA NPH	0	1	0	0	0	3	0	0	0	2
311	33	12	34	2	1	SULFATO FERROSO METILDOPA	1	1	0	0	0	9	2	0	1	2
312	16	4	20	1	0		0	0	0	1	1	2	0	0	0	2
313	35	4	33	2	0	CEFALEXINA ULTRAGESTON	0	0	1	0	1	5	0	0	0	2
314	18	1	28	1	0	SULFATO FERROSO VITAMINA B	0	0	1	0	0	2	1	1	0	2
315	40	16	24	3	0	METLDOPA	1	0	0	0	0	9	4	1	0	2
316	28	1	39	2	1	SULFATO FERROSO METILDOPA	1	0	0	0	0	3	1	0	0	2
317	27	2	40	2	1		1	0	0	0	0	3	1	0	0	2
318	36	2	36	1	0		1	0	0	0	1	3	1	0	0	2
319							0	0	0	0	1	2	0	0	0	2
320	14	1	27				0	0	1	0	0	1	0	0	0	2
321	21	1	28	1	0	SULFATO FERROSO	0	0	1	0	0	3	0	0	0	2
322	36	1	36	3	1		1	0	0	0	0	5	3	0	0	2
323	12	7	0	1	0		0	0	1	0	1	6	0	0	0	2
324	20	8	36	1	0	SULFATO FERROSO	0	0	0	1	1	4	0	0	0	2
325	23	1		2	0	GARDENAL TOPIRAMATO CARBAMAZEPINA	0	0	0	0	1	5	3	0	1	2
326	21	1	32	2	0		0	0	0	0	1	2	0	0	0	2
327	15	1	20	1	0	ACIDO FOLICO SULFATO FERROSO	0	0	0	0	1	2	0	0	0	2
328	21	5	32	2	0	CEFALEXINA	0	1	1	0	0	7	0	0	0	2
329	17	2	28	2	0	SULFATO FERROSO ACIDO FOLICO	0	0	1	0	0	2	0	0	0	2
330	28	1	28	1	0	COMBIRON	1	0	0	0	0	5	0	0	0	2
331		2	34	2	0	SULFATO FERROSO ACIDO FOLICO METILDOPA AMOXILINA AMBROXAL	0	0	1	0	1	5	1	1	0	2
332	29	7	35	1	0	SULFATO FERROSO	1	1	0	0	1	6	0	0	1	2
333	20	9	30	1	0	NIFEDIPINO PINDOLOL HIDRALAZINA	1	0	1	0	0	9	3	1	1	2
334	24	5	35	2	0		1	0	1	0	0	10	4	2	1	2
335	42	2	37	3	0	METILDOPA SULFATO FERROSO	1	1	0	0	0	5	1	0	0	2
336	18	7	8	2	0	DRAMIN	0	0	0	0	1	4	0	0	0	2
337	17	11	29	1	0	DIPIRONA ESCOPOLAMINA	0	0	1	0	1	6	1	1	0	2
338	33	2	16	8	4		0	0	0	0	1	4	0	0	0	2
339	36	3		6	1	SULFATO FERROSO	1	0	0	0	0	2	1	0	0	2
340	18	2	32	2	1	SULFATO FERROSO	1	0	1	0	0	3	0	0	0	2
341	25	10	24	3	0		0	0	1	0	0	4	1	1	0	2
342	28	1	18	2	0	METILDOPA	1	0	0	0	0	4	1	0	0	2
343	20	2	36	2	0	SULFATO FERROSO ACIDO FOLICO	1	0	0	0	0	4	1	0	0	2
344	20	3	34	1	0		0	0	1	0	1	4	0	0	1	2
345	40	11	32	3	0	METILDOPA	1	0	0	0	0	10	4	0	0	2
346	30	3	37	2	0	HUMILIAN	0	0	0	0	1	5	0	0	0	2
347	30	3		2	0	METILDOPA	1	0	0	0	0	3	1	0	0	2
348	32	5	27	2	0	SULFATO FERROSO ACIDO FOLICO NORFLOXACINO	1	1	0	1	0	7	1	0	1	2
349	24	8	31	2	0	SULFATO FERROSO	0	0	1	0	0	5	1	1	0	2
350	27	3	34	3	0	SULFATO FERROSO	0	0	1	0	0	3	0	0	0	2
351	22	5	32	2	1	PARACETAMOL BUSCOPAN	0	0	1	0	1	3	1	1	1	2
352	25	4	32	4	0	SULFATO FERROSO ACIDO FOLICO	0	0	1	0	1	4	0	0	1	2
353	17	1	33	2	0	LEVOTIROXINA	0	0	1	0	0	3	1	0	0	2
354	15	4	36	1	0	SULFATO FERROSO	1	0	0	0	0	0	2	0	0	2
355	28	2	28	1	0	METILDOPA	1	0	0	1	0	5	1	0	0	2
356	26	6	20	4	0	CARBAMAZEPINA FENITOINA FENOBARBITAL	0	0	0	0	1	6	2	0	0	2
357	15	7	18	1	0	SULFATO FERROSO ACIDO FOLICO CEFALEXINA	0	0	0	1	1	5	0	0	0	2
358	27	13	36	4	0		0	1	1	0	0	7	2	0	0	2
359	32	1		1	0	SULFATO FERROSO ACIDO FOLICO	1	0	0	0	0	6	1	0	0	2
360	26	1		4	0	METILDOPA	1	0	0	0	0	5	1	0	0	2
361	21	4	36	3	1		0	1	0	0	1	5	0	0	0	2
362	15	3	36	1	0	ESCOPOLAMINA	0	0	1	0	1	2	0	0	0	2
363	19	4	36	1	0	SULFATO FERROSO	0	0	1	0	1	4	0	0	1	2
364	20	7	25	1	0		0	0	0	0	1	5	0	0	0	2
365	25	2	17	3	2	SULFATO FERROSO ACIDO FOLICO INSULINA NPH	0	1	0	0	1	3	0	0	0	2
366	26	3	7	3	0		0	0	0	0	1	6	1	0	2	2
367	27	6	31	5	1	METRONIDAZOL NISTATINA FENTICONAZOL	0	0	1	0	0	6	1	1	0	2
368	22	6	35	1	0		0	0	0	0	1	6	0	0	0	2
369	16	2	25	1	0	PINDOLOL SOTALOL	1	0	0	0	1	2	1	0	0	2
370	20	1		1	0	SULFATO FERROSO METILDOPA	1	0	0	0	0	2	0	0	0	2
371	41	2	18	4	1	DIPIRONA ESCOPOLAMINA	1	0	0	0	0	3			1	2
372	34	2	27	2	0	SULFATO FERROSO METILDOPA	1	0	1	0	0	5	1	1	0	2
373	21	21	20	2	0		0	0	0	1	0	12	1	1	0	2
374	19	2	34	1	0		0	0	1	0	0	4	1	1	0	2
375	19	1	41	1	0		1	0	0	0	0	3	1	0	0	2
376	38	5	31	1	0	SULFATO FERROSO	1	0	0	0	0	6	0	0	0	2
377	16	1	32	1	0	SULFATO FERROSO	0	0	1	0	0	4	1	1	0	2
378	17	2		1	0	CARBAMAZEPINA	0	0	0	0	1	6	2	1	0	2
379	27	5	32	4	1		1	0	0	0	0	6	0	0	0	2
380	18	1		1	0	SULFATO FERROSO ACIDO FOLICO	1	0	0	0	0	3	1	0	0	2
381	34	1	28	2	0	SULFATO FERROSO METILDOPA	1	0	0	0	0	3	1	0	0	2
382	15	1	27	1	0	SULFATO FERROSO ACIDO FOLICO ESCOPOLAMINA	0	0	1	0	1	2	0	0	0	2
383	20	4	32	3	0	SULFATO FERROSO ACIDO FOLICO	1	1	0	0	1	2	0	0	0	2
384	25	3	32	3	1	SULFATO FERROSO BUSCOPAN	1	0	0	0	1	7	2	0	0	2
385	23	2	34	1	0	METILDOPA CALMAN NATELLE FOLIFER	1	0	0	1	0	4	0	0	0	2
386	24	1		1	0	SULFATO FERROSO	0	0	0	0	1	3	0	0	0	2
387	41	10	35	2	0	METILDOPA	1	0	0	0	0	6	2	0	0	2
388	33	11	26	1	0	SULFATO FERROSO	0	0	1	0	1	3	1	1	0	2
389	30	2	38	2	0		1	0	0	0	1	4	1	0	0	2
390	36	2	32	2	0		1	1	0	0	0	6	1	0	0	2
391	41	2	36	5	0	PARACETAMOL DORFLEX DIPIRONA ANADOR HIDROXIDO DE ALUMINIO	1	0	0	0	1	3	0	0	0	2
392	13	1	28	1	0	SULFATO FERROSO	0	0	1	0	0	2	0	0	0	2
393	26	4	24	3	0	LOSARTANA HIDROCLOROTIAZIDA	1	0	0	0	1	4	1	0	0	2
394	25	3		1	0		1	0	0	0	0	4	1	0	0	2
395	39	2		5	1	INSULINA	0	1	0	0	0	2	0	0	0	2
396	18	2	35	2	0		0	0	1	0	0	5	1	1	0	2
397	30	7	26	1	0	SULFATO FERROSO ACIDO FOLICO METILDOPA	1	1	0	0	1	8	0	0	0	2
398	32	1	38	1	1	METILDOPA LEVOTIROXINA MATERNA	1	0	0	0	1	4	0	0	0	2
399	30	23	27	4		METILDOPA	1	0	0	0	0	16	9	1	1	2
400	26	2	36	1	0	AMOXICILINA	0	0	1	0	0	1	0	0	0	2
401	25	5	39	3	0	PREDNISONA/ÁCIDO FÓLICO	0	0	1	0	1	4	1	1	0	3
402	40	2	37	4	0	SULFATO FERROSO	0	0	1	0	1	1	0	0	0	3
403	22	3	30	1	0	SULFATO FERROSO/ÁCIDO FÓLICO	0	0	0	0	1	1	0	0	0	3
404	33	22	32	1	0	SULFATO FERROSO/ ÁCIDO FÓLICO	1	1	0	0	0	7	0	0	1	3
405	28	3		2	0	SULFATO FERROSO/ACIDO FÓLICO/METILDOPA	1	0	0	0	0	5	1	0	0	3
406	17	2		1	0	SULFATO FERROSO/ METILDOPA	1	0	1	0	0	6	1	0	0	3
407	16	2	34	1	0	POLIVITAMINICOS	0	0	0	1	1	2	0	0	1	3
408	38	2		2	0	METILDOPA	1	0	1	0	0	4	2	0	0	3
409	24	2	37	2	0	METILDOPA	1	0	1	0	0	5	0	0	0	3
410	30	1		2	0	SULFATO FERROSO	0	0	0	0	1	4	1	1	0	3
411		9					0	0	0	0	1	2	0	0	0	3
412	19	13	32	1	0	PARACETAMOL/BUSCOPAM COMPOSTO	0	0	0	1	1	6	0	0	0	3
413	31	1		3	1	METILDOPA	1	0	0	0	0	4	1	0	0	3
414	22	1		1	0	SULFATO FERROSO/ACIDO FÓLICO	1	0	0	0	0	2	1	0	0	3
415	23	15	24	1	0	CEFALEXINA	0	0	0	1	0	5	0	0	1	3
416	29	1		2	0		1	1	1	0	0	0	0	0	1	3
417	33	1	37	3	0	METILDOPA	1	0	0	0	1	5	1	0	0	3
418	34	2		7		SULFATO FERROSO	1	1	0	0	0	3	2	0	0	3
419	26			1	0	ESCOPOLAMINA/ DIPIRONA	0	0	0	1	0	4	0	0	0	3
420	25	5	36	4	0	ESCOPOLAMINA	0	0	1	0	0	4	0	0	1	3
421	18	4	33	2	0	SULFATO FERROSO/VITAMINA C	0	0	0	0	1	5	1	1	1	3
422	40	14	37	6	3	METILDOPA/SULFATO FERROSO/ ACIDO FÓLICO / ESCOPOLAMINA	1	0	0	0	1	8	0	0	1	3
423	33	3	37	4	1	INSULINA	0	1	0	0	0	7	2	0	1	3
424	27	2	37	3	0		0	0	0	0	1	7	0	0	0	3
425		2					0	0	0	0	1	8	1	0	0	3
426		2					0	0	0	0	1	6	1	1	0	3
427	20	9	26	1	0	CEFALEXINA	0	0	1	1	0	6	1	1	0	3
428	30	2	37	3	1		0	1	0	0	0	4	1	1	0	3
429	22	2	40	1	0	ÁCIDO FÓLICO/SULFATO FERROSO	1	0	0	0	0	4	1	1	0	3
430	18	4	38	1	0	SULFATO FERROSO/ÁCIDO FÓLICO	0	0	0	0	1	5	0	0	0	3
431	31	1	40	1	0	NORIPURUM/COMPLEXO B/ÁCIDO FÓLICO	0	0	0	0	1	2	0	0	0	3
432	29	2	26	5	2	INSULINA	0	0	0	0	1	3	0	0	0	3
433	28	2	31	3	0	SULFATO FERROSO	0	0	0	0	1	3	0	0	0	3
434	19	3	22	1	0		1	0	0	0	0	6	2	0	0	3
435	26	1	35	3	0	METILDOPA/SULFATO FERROSO/ ACIDO FÓLICO	1	0	0	0	0	3	0	0	0	3
436	30	7	41	1	0		1	0	0	0	1	7	1	1	0	3
437	41	17	33	5	0	METFORMINA/GLIBENCLAMIDA	0	1	0	0	1	3	0	0	0	3
438	18	1	32	1	0	ÁCIDO FÓLICO/SULFATO FERROSO	0	0	0	0	1	2	0	0	0	3
439	22	2		2	0	METILDOPA	1	0	0	0	1	4	1	1	0	3
440	24	4	30	1	0	SULFATO FERROSO	0	0	0	0	1	2	0	0	0	3
441	19	1	38	2	0		1	0	0	0	0	3	1	1	0	3
442	33	3	98	5	2		1	0	0	0	0	7	1	1	0	3
443	31	2	32	6	0	INSULINA	0	1	0	0	0	3	0	0	0	3
444	27	8	20	3	0	SULFATO FERROSO/ACIDO FÓLICO	0	0	0	1	0	4	0	0	0	3
445	18	4	19	2	0	SULFATO FERROSO	0	0	0	1	0	3	0	0	0	3
446	28	2		3	0		1	0	0	0	1	8	2	2	0	3
447	38	1		3	0		0	1	0	0	1	5	0	0	0	3
448	29	5	30	5	2	SULFATO FERROSO	0	0	0	1	1	4	1	1	1	3
449	28	3	34	3	1	SULFATO FERROSO/POLIVITAMINO	0	0	0	0	1	2	0	0	1	3
450	19	8	35	1	0		1	0	0	0	0	7	1	1	1	3
451	25	8	35	2	0	METFORMINA/GLIBENCLAMIDA	0	1	0	0	0	5	1	0	1	3
452	19	3	32	1	0		0	0	0	1	0	4	0	0	1	3
453	32	2	29	3	1	LOSARTANA/METILDOPA/HIDROCLOROTIAZIDA	1	0	0	0	1	6	1	0	1	3
454	28	4		1	0	HIDROCORTIZONA	0	0	0	0	1	8	1	1	0	3
455	20	2	30	2	0	ÁCIDO FÓLICO/SULFATO FERROSO	0	0	1	0	1	5	0	0	1	3
456	37	50		1	0	METILDOPA/ANLODIPINO/SULFATO FERROSO/ÁCIDO FÓLICO	1	1	0	0	1	11	4	1	0	3
457	28	2	35	3	0	ENOXAPARAMINA	0	0	0	0	1	3	0	0	0	3
458	29	2	35	2	0	FUROSEMIDA/DIGOXINA/CAVERDILOL/SULF. FERROSSO/P. BENZANTINA	0	0	0	0	1	5	5	3	0	3
459	18	2	30	1	0	ESCOPOLAMINA/SULFATO FERROSO	0	0	0	0	1	5	0	0	0	3
460	24	2		2	0	METILDOPA	1	0	0	0	0	3	1	0	0	2
461	32	2	32	5	1	METILDOPA	1	0	0	0	0	3	0	0	0	2
462	15	1	19	1	0		0	0	0	1	0	2	0	0	0	2
463	24	2		2	0	METILDOPA	1	0	0	0	0	3	1	0	0	2
464	28	2		2	0	METILDOPA	1	0	0	0	0	3	1	0	0	2
465	17	2	28	1	0	ACIDO FOLICO SULFATO FERROSO	1	0	0	0	0	6	1	0	0	2
466	17	2	26	2	1	ACIDO FOLICO SULFATO FERROSO	0	0	1	0	0	2	0	0	0	2
467	24	3	17	3	0		0	0	0	1	0	5	0	0	0	2
468	18	8	32	1	0		0	0	0	0	1	1	0	0	0	2
469	29	8	23	5	0	METILDOPA INSULINA NPH INSULINA REGULAR	0	1	1	0	0	8	0	0	0	2
470	16	8	24	1	0		0	0	0	0	1	3	0	0	0	2
471	19	8	29	4	1		0	0	1	1	0	6	0	0	0	2
472	26	3	31	1	0	SULFATO FERROSO	0	0	1	0	0	4	0	0	0	2
473	27	2	24	2	0	ACIDO FOLICO	0	0	0	0	1	4	0	0	0	2
474	31	8	30	3	0	METILDOPA GESTAN PLUS	1	0	0	0	0	7	1	0	0	2
475	15	3	24	1	0	SULFATO FERROSO	0	0	0	1	0	5	0	0	0	2
476		1					1	0	0	0	0	7	5	1	0	2
477	36	8	34	3	0		1	1	0	0	0	8	3	0	0	2
478	17	15	35	1	0		1	0	0	0	1	8	2	0	0	2
479	26	7	36	2	0		0	0	1	0	0	3	0	0	0	2
480	40	3	13	1	0	METILDOPA METFORMINA GLIBENCLAMIDA	1	1	0	0	0	6	0	0	0	2
481	19	2	32	1	0		0	0	1	0	0	4	1	1	0	2
482	23	9	28	1	0	CARBAMAZEPINA	1	1	0	0	0	8	2	1	0	2
483	14	14	24	1	0		ACIDO FOLICO SULFATO FERROSO	0	1	0	0	6	0	0	1	2
484	41	10	12	3	1	ACIDO FOLICO SULFATO FERROSO INSULINA NPH INSULINA REGULAR	0	1	0	0	0	4	0	0	0	2
485	35	2		3	0	INSULINA NPH INSULINA REGULAR ACIDO FOLICO SULFATO FERROSO	1	1	0	0	1	6	2	0	0	2
486	18	2	28	1	0	ESCOPOLAMINA	0	0	1	0	0	3	0	0	0	2
487	31	1	31	2	1		0	0	1	0	0	4	0	0	0	2
488	30	1	36	5	1	SULFATO FERROSO	0	0	1	0	0	2	0	0	0	2
489	35	7	33	5	2		0	0	1	0	0	6	0	0	0	2
490	32	6	20	4	1	INSULINA NPH INSULINA REGULAR	0	1	0	0	0	3	0	0	0	2
491	30	5	32	3	0	ALENIA	1	0	0	0	0	4	0	0	0	2
492	24	3	33	2	0	CEFALEXINA VITAMINA C BEROTEC ATROVENT	0	0	0	0	1	4	0	0	0	2
493	26	9	30	2	0	METILDOPA SULFATO FERROSO	1	1	0	0	0	9	0	0	0	2
494	37	9	28	2	0	SULFATO FERROSO	0	0	0	0	1	2	0	0	0	2
495	23	9	11	2	0		0	0	0	0	1	12	2	1	0	2
496	33	3	37	2	0	COMBIRON LEVOTIROXINA MATERNA	0	0	0	0	1	4	0	0	0	2
497	37	7	36	2	0	MATERNA METILDOPA	1	0	0	0	1	7	1	0	0	2
498	16	3	20	1	0	CEFALEXINA	0	0	0	1	0	2	0	0	0	2
499	29	3	22	3	2	ULTROGESTON OMEGA LANELE	0	0	0	0	1	8	0	0	0	2
500	28	3	32	2	0	ACIDO FOLICO SULFATO FERROSO	0	0	1	0	0	3	0	0	0	2
501	33	2		9	3	MATERNA DIPIRONA	1	0	0	0	0	5	1	0	0	2
502	21	5		1	0		1	0	0	0	0	4	1	0	0	2
503	31	2		1	0	GLIBENCLAMIDA METFORMINA	1	0	0	0	0	4	2	0	0	2
504	32	7	32	1	0		1	0	0	0	0	9	1	0	0	2
505	31	1		3	2	METILDOPA	1	0	0	0	0	6	5	1	0	2
506	30	3		3	0	GLIBENCLAMIDA METFORMINA INSULINA NPH	0	1	0	0	0	4	0	0	0	2
507	19	1		2	1	DACTIL D	1	0	0	0	0	3	1	0	0	2
508	27	3	28	3	0		0	0	1	0	0	3	0	0	0	2
509	28	3	32	4	1	MATERNA METILDOPA	1	1	0	0	0	9	2	0	0	2
510	31	2		2	0		1	0	0	0	0	10	2	0	0	2
511	26	2	33	1	0	QUELATO DE FERRO/ÁCIDO FÓLICO/VIT B12	0	0	1	0	1	4	2	2	0	3
512	22	3	34	1	0	CEFALEXINA/NITROFURANTOÍNA	0	0	0	0	1	4	0	0	0	3
513	29	3	35	5	2	SULFATO FERROSO/SERTRALINA	0	0	0	1	1	4	1	1	0	3
514	37	3		2	0	CUMARINA+TROXERRUTINA	1	0	0	0	0	4	0	0	0	3
515	34	3	30	6	0		0	0	0	0	1	3	1	1	0	3
516	18	5	31	1	0		0	0	0	0	1	6	0	0	0	3
517	15	3	21	1	0	ÁCIDO FÓLICO/SULFATO FERROSO	0	0	0	0	1	4	0	0	0	3
518	17	3	21	1	0	ÁCIDO FÓLICO/SULFATO FERROSO	0	0	0	0	1	2	0	0	0	3
519	19	1		1	0	QUELATO DE FERRO/ÁCIDO FÓLICO/VIT B12	1	0	0	0	1	3	0	0	0	3
520	23	3	27	1	0	ÁCIDO FÓLICO/SULFATO FERROSO	1	0	0	0	1	6	1	1	0	3
521	39	2		2	0	ÁCIDO FÓLICO/SULFATO FERROSO	1	0	0	0	1	3	1	1	0	3
522	18	6	30	2	0	ÁCIDO FÓLICO/SULFATO FERROSO	0	0	0	0	1	2	0	0	0	3
523	27	13	34	2	0	SULFATO FERROSO	0	0	0	1	0	7	0	0	0	3
524	22	9	27	3	0	METILDOPA	1	0	0	0	1	5	0	0	0	3
525	31	1	38	3	0		1	0	0	0	0	4	0	0	0	3
526	37	1	35	5	3	ÁCIDO FÓLICO/SULFATO FERROSO	0	0	0	0	1	3	0	0	0	3
527	28	8	35	2	0	ÁCIDO FÓLICO/SULFATO FERROSO/INSULINA NPH/INSULINA REGULAR	1	1	0	0	0	6	3	0	0	3
528	44	2		9	3	PROPANOLO/METFORMINA/ACIDO ACETILSALICILICO/METILDOPA	1	1	0	0	1	4	1	0	0	3
529	32	2	36	6	3	CEFALEXINA	1	1	0	0	0	7	2	0	0	3
530		2	20	2	1		0	0	0	0	1	3	0	0	0	3
531		1					0	0	0	0	1	5	1	1	0	3
532	24	4	31	3	1	METILDOPA/NIFEDIPINO RETARD	1	0	0	0	1	8	2	1	0	3
533	18	3	23	1	0		0	0	0	0	1	4	1	1	0	3
534	34	10	24	1	0	METILDOPA/METFORMINA	1	1	0	0	1	12	3	2	0	3
535	17	1	37	1	0		1	0	0	0	0	3	1	1	0	3
536	21	10	34	3	1	ESCOPOLAMINA	0	0	0	0	1	5	1	0	0	3
537	29	1	37	3	1		1	0	0	0	1	6	3	1	0	3
538	1	9	23	1	0	SULFATO FERROSO	0	0	0	1	0	7	1	1	0	3
539	33	2	37	4	2		1	0	0	0	1	3	1	1	0	3
540	34	11	35	5	1	ÁCIDO FÓLICO/SULFATO FERROSO	1	0	0	0	0	5	1	0	0	3
541	29	13	28	2	1		0	0	0	1	1	9	2	2	0	3
542	32	5	37	4	1	ATENOLOL/HIDROCLOROTIAZIDA	1	0	0	1	0	8	0	0	0	3
543	43	1	16	4	1	ÁCIDO FÓLICO/SULFATO FERROSO	1	0	0	0	0	5	1	0	0	3
544	24	14	25	5	2	METILDOPA	1	0	0	0	1	5	1	1	0	3
545	45	6	19	2	0	HALOPERIDOL/LEVOPROMAZINA/LEVOTIROXINA/METILDOPA/LAMOTRIGINA/INSULINA NPH/INSULINAREGULAR	1	1	0	0	1	9	1	0	0	3
546	19	2	0	2	0	METILDOPA	1	0	0	0	0	3	1	1	0	3
547	44	2	37	19	1		0	0	0	0	1	3	1	1	0	3
548	17	2	32	1	0	NITROFURANTOÍNA	0	0	0	1	0	3	0	0	0	3
549		1	32	1	0		0	0	0	0	1	3	0	0	0	3
550	21	8	28	4	1	METFORMINA/INSULINA NPH	0	1	0	0	0	7	1	1	0	3
551	21	8	42	1	0	VENOFLEXE*	0	0	0	0	1	10	2	2	0	3
552		5					0	0	0	0	1	4	1	1	0	3
553	34	12	36	2	1	METILDOPA	1	0	0	1	1	8	0	0	0	3
554	31	4	30	2	0	ÁCIDO FÓLICO/SULFATO FERROSO	0	0	0	0	1	3	0	0	0	3
555	24	4	40	3	1		1	0	0	0	0	7	4	0	0	3
556		3	30	5	2	METILDOPA	1	0	0	0	0	5	1	0	0	3
557		1					1	0	0	0	0	4	1	1	0	3
558	22	1					0	0	0	0	1	2	0	0	0	3
559	33	2		2	0	METILDOPA	1	0	0	0	1	4	0	0	0	3
560	22	3	35	1	0		0	0	1	0	0	4	1	1	0	3
561	25	40	2	1	0		1	0	0	0	0	3	0	0	0	3
562	20	12	36	3	1	METILDOPA	1	0	0	0	1	2	0	0	0	3
563	22	2	34	3	0	ESCOPOLAMINA	0	0	1	0	1	6	1	1	0	3
564	26	1	6	2	2	ÁCIDO FÓLICO/ESCOPOLAMINA	0	0	0	0	1	2	0	0	0	3
565	26	3	36	2	0	VITAMINA C	0	0	0	0	1	3	0	0	0	3
566	26	8	37	3	0	CEFALEXINA/CARBAMAZEPINA/ÁCIDO FÓLICO/SULFATO FERROSO	0	0	0	0	1	10	5	3	0	3
567	27	1		1	0	LOSARTANA/HIDROCLOROTIAZIDA/ANLODIPINO/METILDOPA	1	0	0	0	1	6	4	1	0	3
568	25	3		2	0	METILDOPA/NIFEDIPINO	1	0	0	0	0	3	1	1	0	3
569	33	5	33	5	2		1	0	0	0	1	5	1	1	0	3
570	32	23	35	3	0	METILDOPA/NIFEDIPINO	1	1	0	0	1	13	3	1	0	3
571	32	3		2	0		1	1	0	0	1	6	3	0	0	3
572	21	1		2	0	SULFATO FERROSO/METILDOPA	1	0	0	0	0	4	1	0	0	3
573	31	8	34	4	0		0	0	0	0	1	3	1	1	0	3
574	29	1	39	3	1		0	0	0	1	1	10	10	6	0	3
575	15	2		2	0	SULFATO FERROSO	1	0	0	0	0	4	1	0	0	3
576		5	27	1	0		0	0	0	0	1	5	2	2	0	3
577	21	8	35	1	0	INSULINA	1	1	0	0	0	9	4	0	0	3
578	21	4	37	2	1	INSULINA NPH	1	1	1	0	0	8	3	0	0	3
579	26	10	37	1	0	METILDOPA	1	0	0	0	0	3	1	0	1	3
580		1					1	0	0	0	0	4	0	0	0	3
581	22	1	39	1	0	METILDOPA	1	0	0	0	1	4	1	0	0	3
582	43	7	28	2	1	METILDOPA/INSULINA NPH/INSULINA REGULAR/SULFATO FERROSO	1	1	0	0	1	11	2	1	0	3
583	32	15	37	3	1	SULFATO FERROSO	1	1	0	0	0	5	0	0	0	3
584	23	5	36				1	1	0	0	0	9	3	0	0	3
585	27	3	36	2	0		1	0	0	0	1	4	0	0	0	3
586	37	2	42	1	0	SULFATO FERROSO	1	0	0	0	0	4	1	0	0	3
587	28	5	38	4	0	METILDOPA	1	0	0	0	0	7	5	0	0	3
588		1					1	1	0	0	0	5	0	0	0	3
589	15	4	28	1	0	CEFALEXINA	0	0		1	0	5	0	0	0	3
590	40	3		3	0	ÁCIDO FÓLICO/SULFATO FERROSO	1	0	0	0	1	4	1	0	0	3
591		3	29	3	1		1	0	1	0	0	4	1	1	0	3
592	26	22	37	2	0		0	0	0	0	1	10	11	9	0	3
593	22	2	32	1	0	CEFALEXINA/NITROFURANTOÍNA	0	0	0	1	0	2	0	0	0	3
594	40	3		2	0	POLIVITAMINICO	0	1	0	0	1	4	1	1	0	3
595	27	2		1	0	ÁCIDO FÓLICO/SULFATO FERROSO	1	0	1	0	0	4	1	0	0	3
596	19	1	36	1	0		0	0	1	0	0	2	0	0	0	3
597	20	3	35	1	0		1	0	0	0	0	4	1	0	0	3
598	37	3	37	13	2	SULFATO FERROSO	0	0	1	1	0	4	0	0	0	3
599	29	13	33	1	0	FERRO QUELATO	1	0	0	0	1	4	0	0	0	3
600	28	8	33	2	0	ÁCIDO FÓLICO/SULFATO FERROSO	0	1	0	0	0	6	0	0	0	3
601	18	3	33	1	0	ÁCIDO FÓLICO	0	0	0	0	1	2	0	0	0	3
602	24	2	36	2	1	ÁCIDO FÓLICO/SULFATO/POLIVITAMICO	0	0	0	0	1	3	0	0	0	3
603	17	2	36	1	0	SULFATO FERROSO	0	0	1	0	1	5	1	1	0	3
604	24	2	22	3	0	SULFATO FERROSO/CEFALEXINA	0	0	0	1	0	5	0	0	0	3
605	16	5	33	1	0	SULFATO FERROSO	0	0	1	0	0	3	0	0	0	3
606	22	1		2	0	METILDOPA	1	0	0	0	0	5	1	0	0	3
607	28	1		4	2		1	0	0	0	0	4	1	0	0	3
608	35	7	28	6	1	INSULINA NPH/INSULINA REGULAR	0	1	0	0	0	2	0	0	0	3
609	26	1	37	2	1	SULFATO FERROSO	1	0	0	0	0	2	0	0	0	3
610	15	1	32	1	0		0	0	1	0	0	2	0	0	0	3
611	29	5	20	3	0	SULFATO FERROSO/ÁCIDO FÓLICO	0	0	0	1	1	3	0	0	0	3
612	20	29	35	3	1		0	0	1	0	1	6	1	1	0	3
613	17	10	36	2	0	SULFATO FERROSO	0	1	0	0	1	5	0	0	0	3
614	32	5	34	1	0	INSULINA NPH	1	1	0	0	1	10	6	0	0	3
615	15	5	29	1	0	METILDOPA/SULFATO FERROSO/ÁCIDO FÓLICO	1	0	0	0	0	7	2	0	0	3
616	28	12	39	3	0	INSULINA NPH/SULFATO FERROSO	0	1	0	0	1	5	0	0	1	3
617	35	4	34	1	0	SULFATO FERROSO/ÁCIDO FÓLICO	1	0	0	0	0	7	1	0	0	3
618	20	4	36	1	0	SULFATO FERROSO/ÁCIDO FÓLICO	1	0	0	0	0	6	1	0	0	3
619	29	1		1	0		1	0	0	0	0	5	0	0	0	3
620	21	15	24	3	1	AMITRIPTILINA/TOPIRAMATO/CEFALIUM	0	0	1	0	0	11	2	1	0	3
621	17	1		1	0	SULFATO FERROSO/ESCOPOLAMINA	1	0	0	0	0	3	0	0	0	3
622	21	3	34	2	1	SULFATO FERROSO/ÁCIDO FÓLICO	1	1	0	0	0	6	0	0	0	3
623	22	7	33	1	0	SULFATO FERROSO/ÁCIDO FÓLICO	1	0	0	1	1	4	1	0	0	3
624	26	2		2	0		0	0	0	0	1	2	0	0	0	3
625	32	2		1	0	METILDOPA/NIFEDIPINO	1	0	0	0	0	6	2	0	0	3
626	30	15	33	3	0	SULFATO FERROSO/ÁCIDO FÓLICO/INSULINA	0	1	0	0	1	4	0	0	0	3
627	22	2	32	1	0		1	0	0	0	0	3	0	0	0	3
628	37	8	28	6	1	INSULINA NPH/SULFATO FERROSO/ÁCIDO FÓLICO	0	1	0	0	0	6	0	0	1	3
629	21	6	33	1	0		1	0	0	0	1	10	3	2	1	3
630	30	13	36	2	0	SULFATO FERROSO	1	0	1	0	1	10	2	2	1	3
631	16	8	38	1	0	ESCOPOLAMINA	0	0	1	0	1	11	2	2	1	3
632		5	37	4	1	METILDOPA	1	0	0	0	1	7	1	0		3
633	20	5		2	0	METILDOPA	1	0	0	0	1	6	2	0	1	3
634	28	2	36	4	1	INSULINA NPH/INSULINA REGULAR	0	1	1	0	1	3	0	0	0	3
635	18	5	37	2	0	SULFATO FERROSO	0	0	0	1	0	3	0	0	1	3
636	38	1	37	3	0		1	0	0	0	0	5	2	0	0	3
637	28	12	28	2	1	CEFALEXINA/ESCOPOLAMINA/ONDANSETRONA	0	0	1	0	1	13	2	1	0	3
638	42	7	33	2	1	NIFEDIPINO/METILDOPA/SULFATO FERROSO	1	0	0	0	1	10	12	5	1	3
639	41	8	27	2	1	SULFATO FERROSO/ÁCIDO FÓLICO	1	0	0	0	1	6	1	0	1	3
640	20	1		3	1		0	0	0	0	1	3	1	1	0	3
641	35	7	33	5	1	FUROSEMIDA/CAVERDILOL/BENZETACIL	1	0	0	0	1	5	5	2	0	3
642	30	5	33	2	1		0	0	1	0	1	6	2	2	0	3
643	32	1	36	1	0	METILDOPA/NIFEDIPINO	1	0	0	0	0	3	0	0	0	3
644	31	4		2	0	METILDOPA	1	0	0	0	1	5	1	0	1	3
645	26	4	31	1	0	SULFATO FERROSO/ÁCIDO FÓLICO	1	0	1	0	1	5	1	1	0	3
646	28	3	33	4	2	SULFATO FERROSO/ÁCIDO FÓLICO/POLIVITAMICO	1	0	1	0	0	4	1	1	0	3
647		1	41	2	0	SULFATO FERROSO/ÁCIDO FÓLICO	1	0	0	0	0	4	1	0	0	3
648	30	4	19	3	1		0	0	0	0	1	2	0	0	0	3
649	32	2		3	0		0	0	0	0	1	9	2	2	0	3
650	23	10	37	1	0	METILDOPA/SULFATO FERROSO	1	0	0	0	0	9	2	0	0	3
651	19	2	37	2	1	METILDOPA	1	0	0		0	6	1	1	0	3
652	30	1		2	0	METILDOPA/NIFEDIPINO	1	0	0	0	1	4	1	0	0	3
653	18	4	33	1	0	POLIVITAMINICO	1	0	0	0	1	4	1	0	0	3
654	29	6	33	2	1	SULFATO FERROSO	0	0	1	0	1	2	0	0	0	3
655	18	3	35	2	1		1	0	0	0	0	7	5	1	0	3
656		1					0	0	0	0	1	2	0	0	0	3
657	29	24	33	8	2	SULFATO FERROSO	1	1	0	0	1	14	1	0	0	3
658	40	2	14	7	1	CAPTOPRIL/METIILDOPA	1	0	0	0	0	6	1	0	0	3
659	19	2	28	1	0	POLIVITAMINICO	0	0	0	0	1	3	0	0	0	3
660	19	1	37	2	0		1	0	0	0	0	4	1	0	0	3
661	39	7	37	2	1		1	0	0	0	0	10	5	0	0	3
662	20	3	37	3	1	INSULINA	0	1	0	0	0	5	3	0	0	3
663	35	1	37	5	1	SULFATO FERROSO	0	0	0	0	1	3	0	0	0	3
664	40	1	33	2	0	POLIVITAMINICO	1	1	0	0	0	4	0	0	0	3
665	18	1	28	2	1	SULFATO FERROSO	1	0	0	0	1	4	0	0	0	3
666	31	1	36	2	1		0	1	0	0	0	4	1	0	0	3
667	18	4	30	1	0	SULFATO FERROSO/ÁCIDO FÓLICO	0	0	0	1	0	4	0	0	0	3
668	36	3	30	1	0	LEVOTIROXINA/METILDOPA/SULFATO FERROSO/ÁCIDO FÓLICO	1	1	0	0	1	7	0	0	0	3
669		1	29	7	2		1	0	0	0	1	5	1	0	1	3
670	43	10	23	2	1	INSULINAA NPH/INSULINA REGULAR/METILDOPA/SULFATO FERROSO/ÁCIDO FÓLICO	1	1	0	0	1	9	0	0	0	3
671	15	4	33	1	0	ÁCIDO FÓLICO/SULFATO FERROSO/AMBROXOL	0	0	1	0	1	4	0	0	0	3
672	22	2	30	1	0		0	0	0	0	1	3	0	0	0	3
673	39	1		3	1	POLIVITAMINICO/PROGESTERONA	0	1	0	0	1	4	0	0	0	3
674	31	2	33	2	1	QUELATO DE FERRO/ÁCIDO FÓLICO/VIT B12	0	1	1	0	0	2	0	0	0	3
675	20	2	33	1	0	ESCOPOLAMINA	1	0	0	0	1	3	0	0	0	3
676	15	2	37	1	0		0	0	1	0	1	4	1	1	0	3
677	24	10	19	5	2		1	0	0	0	1	5	0	0	0	3
678	21	1	37	3	1	SULFATO FERROSO	0	0	0	0	1	2	0	0	0	3
679	28	1	42	1	0	ÁCIDO FÓLICO/SULFATO FERROSO	1	0	0	0	0	3	1	0	0	3
680	23	1				CARBAMAZEPINA	0	0	1	0	0	2	0	0	0	3
681	30	3	34	1	0	POLIVITAMINICO/HIDRÓXIDO DE ALUMINIO	1	1	0	0	0	6	0	0	0	3
682	26	10	36	1	0		0	0	1	0	0	3	0	0	0	3
683	33	3	33	1	0		0	0	1	0	1	5	1	1	0	3
684	39	4	36	2	0		1	0	0	0	1	6	3	1	0	3
685	31	9	31	2	0		0	0	1	0	1	6	2	2	0	3
686	14	4	32	1	0		1	1	0	0	0	6	0	0	0	3
687	26	4	34	3	1	SULFATO FERROSO	1	1	0	0	0	8	3	1	0	3
688	35	3	37	11	0	SULFATO FERROSO	0	0	0	1	0	3	0	0	0	3
689	27	2		3	1		0	0	0	0	1	2	0	0	0	3
690	32	9	38	1	0	INSULINA NPH/INSULINA REGULAR	1	1	0	0	0	11	8	2	0	3
691	24	4	28	1	0	SULFATO FERROSO	0	0	0	1	0	5	1	1	0	3
692		1	35	5	2		1	0	0	0	1	4	2	1	0	3
693		1					1	0	0	0	0	5	1	0	0	3
694		1					1	0	0	0	0	4	1	0	0	3
695		1	35	2	0		0	0	0	0	1	3	1	1	0	3
696	15	3	32	1	0	ÁCIDO FÓLICO/SULFATO FERROSO/AMBROXOL	1	0	1	0	0	6	2	2	0	3
697	29	1	37	1	0		0	1	0	0	0	4	0	0	0	3
698	19	2	36	2	0	HIDRÓXIDO FÉRRICO	1	0	0	0	1	3	0	0	0	3
699	28	2	26	2	0	ÁCIDO FÓLICO/SULFATO FERROSO	0	1	1	0	0	7	0	0	0	3
700	17	3	37	1	0	ÁCIDO FÓLICO/SULFATO FERROSO	0	0	1	0	0	6	0	0	0	3
701		16	36				1	1	1	0	0	9	0	0	0	3
702	32	1	42	3	1		1	0	0	0	0	5	1	0	0	3
703	28	4	37	3	0	SULFATO FERROSO/INSULINA	0	1	1	0	0	5	0	0	0	3
704	32	2	14	4	1	INSULINA NPH/INSULINA REGULAR	0	1	0	0	0	4	0	0	0	3
705	18	2	33	1	0		0	1	0	0	1	4	0	0	0	3
706	32	8	18	3	1	SULFATO FERROSO	0	1	0	0	0	5	0	0	0	3
707	22	1	36	1	0	METILDOPA/SULFATO FERROSO	1	0	0	0	0	4	0	0	0	3
708	30	1		3	1	METILDOPA	1	0	0	0	1	3	1	0	0	3
709	21	1		3	1		1	0	0	0	1	4	1	0	0	3
710	29	4	37	4	2	METILDOPA	1	0	0	0	0	6	0	0	0	3
711	30	1	36	1	0		1	0	0	0	0	4	0	0	0	3
712	23	4	18	2	0	ESCOPOLAMINA	0	0	0	1	0	4	0	0	0	3
713	34	3	33	6	1		0	0	1	0	0	5	1	1	0	3
714		1					0	0	0	0	1	2	0	0	0	3
715	37	8	38	4	1	INSULINA	0	1	0	0	0	7	2	0	0	3
716		1					0	0	1	0	0	3	0	0	0	3
717	30	3	32	2	0		0	0	1	0	1	4	2	2	0	3
718	37	8		3	1	METILDOPA	1	0	0	0	1	10	5	2	0	3
719		1					0	0	0	0	1	3	0	0	0	3
720	23	1	33	1	0	SULFATO FERROSO/METILDOPA	1	0	0	0	0	3	0	0	0	3
721	23	4	38	1	0	INSULINA	1	1	0	0	1	10	7	0	0	3
722	17	4	34	2	0		0	1	1	0	0	5	0	0	0	3
723	29	1	10	2	0	ÁCIDO FÓLICO	0	0	0	0	1	2	0	0	0	3
724	27	7	16	1	0	CEFALEXINA	0	0	0	1	1	4	0	0	0	3
725		1					0	0	0	0	1	3	0	0	0	3
726		1	36				1	0	0	0	0	4	1	0	0	3
727	40	2	28	2	0	POLIVITAMICO	0	1	1	0	0	5	0	0	0	3
728	35	1	35	4	1		1	0	0	0	0	2	0	0	0	3
729	38	2		2	1		1	1	0	1	1	10	5	0	0	3
730		1					0	0	0	0	1	2	0	0	0	3
731	31	2		2	0	METILDOPA	1	0	0	0	1	3	1	0	0	3
732	30	2	36	2	0	METILDOPA/NIFEDIPINO	1	0	0	0	1	5	0	0	0	3
733	19	2	13			METILDOPA/INSULINA NPH/INSULINA REGULAR	1	1	0	0	0	9	1	0	0	3
734	34	2	36	6	2	ESCOPOLAMINA	0	0	0	1	1	4	0	0	0	3
735	22	2	36	1	0	INSULINA/SULFATO FERROSO	1	1	0	1	1	11	3	0	0	3
736	22	5	36	1	0	SULFATO FERROSO INSULINA	0	1	0	1	0	8	1	0	0	2
737		1					1	0	0	0	0	3	1	0	0	2
738		1					1	0	0	0	0	3	1	0	0	2
739		1		5	2		0	0	0	0	1	4	0	0	0	2
740		1					1	0	0	0	0	3	1	0	0	2
741	27	1	36	2	0	NORIPURUM	0	0	1	1	0	2	0	0	0	2
742	18	1		1	0	DIPIRONA	1	0	0	0	0	5	1	0	0	2
743	17	1		1	0	METILDOPA	1	0	0	0	0	6	1	0	0	2
744	26	3	32	2	0	METILDOPA	1	0	1	0	0	5	1	0	0	2
745	35	4	21	4	2	ACIDO ACETILSALICILICO ENOXAPARINA	0	0	0	0	1	6	2	2	0	2
746		1					1	0	0	0	0	4	1	0	0	2
747	21	2	32	1	0	ACIDO FOLICO SULFATO FERROSO	0	0	1	0	0	5	1	0	0	2
748	15	2	28	1	0	SULFATO FERROSO	1	0	0	0	0	2	1	0	0	2
749	21	2		1	0	BENZETACIL	0	0	0	0	1	3	0	0	0	2
750	20	1	37	1	0	SULFATO FERROSO	1	0	0	0	0	2	0	0	0	2
751	16	3	24	1	0	ACIDO FOLICO SULFATO FERROSO	0	0	1	0	1	6	0	0	0	2
752	22	2	28	1	0		0	0	1	0	1	4	2	1	0	2
753	24	4	20	1	0		0	0	1	1	1	6	2	1	0	2
754	45	4	11	2	0	INSULINA NPH INSULINA REGULAR LEVOTIROXINA HALOPERIDOL METILDOPA	1	1	0	0	1	6	1	0	0	2
755	32	4	28	2	1	ACIDO FOLICO SULFATO FERROSO VITAMINA C	1	0	1	0	0	5	0	0	0	2
756	16	2	37	1	0		1	0	0	0	0	3	1	0	0	2
757	19	4	28	2	0	SULFATO FERROSO	1	0	1	0	0	5	1	0	0	2
758	18	1	32	2	0		0	0	0	0	1	6	2	0	0	2
759	21	1	35	1	0	ACIDO FOLICO SULFATO FERROSO	1	0	1	0	0	2	0	0	0	2
760	38	6	30	3	0	LOSARTANA HIDROCLOROTIAZIDA METILDOPA NIFEDIPINO	1	0	1	0	0	10	3	2	0	2
761	21	2	32	3	0	SULFATO FERROSO VITAMINA C	0	0	1	1	0	2	0	0	0	2
762	19	2	32	1	0	SULFATO FERROSO	0	0	1	1	0	2	0	0	0	2
763	19	8	28	3	1	ESCOPOLAMINA DIPIRONA	0	0	0	1	1	5	0	0	0	2
764	28	1	34	3	0		1	0	0	0	0	3	0	0	0	2
765	30	1	40	1	0		1	0	0	0	0	5	1	0	0	2
766	22	14	24	3	0		0	0	1	0	0	5	2	1	0	2
767	30	1	36	2	0	METILDOPA MATERNA	1	0	1	0	0	3	0	0	0	2
768	30	7	20	3	0	PARACETAMOL	0	0	0	1	0	3	0	0	0	2
769	21	2	37	2	1		1	0	0	0	0	6	1	0	0	2
770		1		2	0		0	0	0	0	1	3	1	1	0	2
771	40	1	34	3	0	METILDOPA	1	0	0	0	1	3	0	0	0	2
772	26	3	36	2	0	PROPRANOLOL	1	0	0	0	0	5	0	0	0	2
773		1					1	1	0	0	1	6	4	0	0	2
774		1	38				0	0	0	0	1	4	1	0	0	2
775	20	3	28	1	0	CEFALEXINA	1	0	1	1	0	7	2	1	0	2
776	41	1	36	1	0		1	0	0	0	0	4	3	1	0	2
777	30	2	32	1	0	LEVOTIROXINA MATERNA	0	0	1	0	0	5	1	1	0	2
778	26	5	38	2	0	METILDOPA SULFATO FERROSO DAMATER	1	0	0	0	1	9	2	0	0	2
779		2					1	1	0	0	0	6	6	0	0	2
780	36	1	32	1	0		0	1	0	0	0	5	0	0	0	2
781	26	2		2	0	METILDOPA	1	0	0	0	0	4	1	0	0	2
782	35	8	25	2	0	METFORMINA GLIBENCLAMIDA	0	1	0	0	1	5	0	0	1	2
783	37	1		8	1		0	0	0	0	1	2	0	0	0	2
784	19	1	28	2	0		0	0	1	0	0	5	1	1	0	2
785	22	2	32	1	0	METILDOPA	1	0	0	0	0	8	1	0	0	2
786		1					0	0	0	0	1	3	0	0	0	2
787	41	2	32	3	0		0	1	0	0	0	4	0	0	0	2
788	16	1	34	2	1		0	0	1	0	0	3	1	1	0	2
789	28	10	34	3	0		0	0	1	0	0	4	0	0	0	2
790	33	3	32	9	4	METILDOPA	1	0	0	1	0	8	1	1	0	2
791	22	4		1	0	METILDOPA	1	0	0	0	0	7	3	1	0	2
792	15	1	16	1	0	ACIDO FOLICO SULFATO FERROSO	1	0	0	0	0	5	0	0	0	2
793	24	3		1	0		1	1	0	0	0	8	4	1	0	2
794	16	9	16	1	0	PARACETAMOL	0	0	0	1	1	7	0	0	0	2
795	26	3	32	2	0	INIBINA	0	0	1	0	0	6	2	2	0	2
796	34	1	24	6	2	SULFATO FERROSO	0	0	1	0	0	5	1	1	0	2
797	38	4	33	2	0	ENALAPRIL HIDROCLOROTIAZIDA METILDOPA	1	1	0	0	0	7	2	0	0	2
798	18	2	32	1	0	SULFATO FERROSO	0	0	1	0	0	4	1	1	0	2
799	22	2	31	1	0		0	1	0	0	0	3	0	0	0	2
800	31	2	28	2	0		1	0	0	0	0	3	0	0	0	2
801	23	2	32			CARBAMAZEPINA INSULINA NPH	0	1	1	0	1	8	0	0	0	2
802	42	2	28	4	2	ACIDO ACETILSALICILICO CALMAN METILDOPA	1	0	0	0	0	5	2	0	0	2
803	22	1		1	0		1	0	0	0	0	4	1	0	0	2
804	27	1		2	1	PREDNISONA HIDROCLOROTIAZIDA	0	0	0	0	1	6	4	3	0	2
805	33	2	8	2	1	INSULINA SULFATO FERROSO	0	0	0	0	1	8	0	0	0	2
806		1					1	0	0	0	0	3	1	0	0	2
807	32	2	40	2	0	METILDOPA	1	0	0	0	0	4	1	0	0	2
808	25	2	40	4	0	CEFALEXINA METILDOPA	1	0	0	0	0	5	1	0	0	2
809	37	3	27	1	0	LOSARTANA HIDROCLOROTIAZIDA METILDOPA ANLODIPINO	1	1	0	0	0	9	2	2	0	2
810	21	2	32	1	0	METILDOPA	1	0	0	0	1	4	1	0	0	2
811	29	5	30	1	0	FORMOTEROL METILDOPA	1	0	0	0	1	7	1	0	0	2
812	31	5	38	2	0	ACIDO FOLICO SULFATO FERROSO	1	0	0	0	1	11	3	1	0	2
813	27	1	32	4	1	SULFATO FERROSO	0	0	1	0	0	2	0	0	0	2
814		2					1	0	0	1	0	6	1	0	0	2
815	16	1		1	0	METILDOPA	1	0	0	0	0	6	4	0	0	2
816	27	2	28	1	0	SULFATO FERROSO	0	0	1	0	0	3	1	1	0	2
817	15	7	18	1	0	CEFALEXINA	0	0	0	1	1	3	0	0	0	2
818	25	4	32	3	0	SULFATO FERROSO	0	0	1	0	0	6	2	2	0	2
819	38	2	33	2	0	SULFATO FERROSO METILDOPA	0	0	1	0	0	9	0	1	0	2
820	19	3	37	1	0	SULFATO FERROSO	1	0	0	0	0	4	1	0	0	2
821	37	3	16	6	2		1	0	0	0	0	2	0	0	0	2
822		1					0	0	1	0	0	2	1	1	0	2
823	21	1	36	2	0	ACIDO FOLICO SULFATO FERROSO COMPLEXO B	0	0	1	0	0	3	0	0	0	2
824	19	2	36	3	0		1	0	0	0	0	4	1	0	0	2
825	41	1	37	5	2	INSULINA METILDOPA	1	0	0	0	1	9	4	0	0	2
826	22	3	32	1	0	SULFATO FERROSO VITAMINA C	0	0	1	0	0	4	0	0	0	2
827	22	1	33	1		ACIDO FOLICO SULFATO FERROSO METILDOPA	1	0	1	0	0	3	0	0	0	2
828	29	4	36	5	2	METILDOPA LOSARTANA	1	0	0	0	1	8	0	0	0	2
829	27	2	32	1	0		1	0	0	0	0	6	1	0	0	2
830	24	3	28	1	0	PARACETAMOL SULFATO FERROSO	0	0	1	0	0	4	0	0	0	2
831	36	1	32	1	0	METILDOPA	1	0	0	0	0	3	1	0	0	2
832	28	2		3	0	METILDOPA SULFATO FERROSO ESCOPOLAMINA	1	0	0	0	0	3	1	0	0	2
833	20	7	24	1	0		0	0	0	0	1	6	0	0	0	2
834	20	9		1	0	METILDOPA	1	0	0	0	0	10	6	0	0	2
835	19	3	20	1	0	ULTROGESTON	1	0	0	0	1	4	1	1	0	2
836	15	1	33	1	0	SULFATO FERROSO	0	0	0	0	1	3	0	0	0	2
837		2	28	8	1		0	0	0	0	1	1	0	0	0	2
838	25	2	24	2	1	CARBAMAZEPINA	0	0	1	0	0	5	1	0	0	2
839	28	5	30	3	0	RANITIDINA	0	0	0	0	1	9	2	2	0	2
840	39	1	31	4	2		1	0	0	0	0	2	0	0	0	2
841	17	3		1	0	ACIDO FOLICO SULFATO FERROSO	1	0	0	0	0	4	1	0	0	2
842	19	11	24	2	0	SULFATO FERROSO ULTROGESTON	0	0	0	0	1	5	0	0	0	2
843	21	4		1	0		1	0	1	0	0	6	1	0	0	2
844	18	1	32	1	0	ACIDO FOLICO SULFATO FERROSO	0	0	0	0	1	2	0	0	0	2
845	30	4	33	4	0	FLUOXETINA CEFALEXINA	1	0	1	0	0	9	1	1	0	2
846	22	3	35	2	0		0	0	0	0	1	8	0	0	0	2
847	40	3	36	3	0	METILDOPA	1	1	0	0	0	6	2	0	0	2
848	25	3	36	1	0	SULFATO FERROSO	0	1	0	0	0	4	0	0	0	2
849	27	4	34	1	0	MATERNA NIFEDIPINO	0	0	0	1	1	7	0	0	0	2
850		1					1	0	0	0	0	3	1	0	0	2
851		1					1	0	0	0	0	4	1	0	0	2
852	23	4	30	3	0	ACIDO FOLICO CARBAMAZEPINA	0	1	1	1	0	12	3	1	0	2
853	31	1				INSULINA NPH INSULINA REGULAR	0	1	0	0	0	5	0	0	0	2
854	29	8		1	0	ACIDO FOLICO SULFATO FERROSO	1	0	0	0	0	6	1	0	0	2
855	24	1	34	1	0		0	0	1	0	0	3	0	0	0	2
856	23	1	36	4	1	INSULINA NPH INSULINA REGULAR METILDOPA	0	1	0	0	0	4	0	0	0	2
857	28	3	33	2	0		0	1	0	0	1	4	0	0	0	2
858	37	5	36	4	2		0	1	0	0	0	7	0	0	0	2
859	33	2	28	3	1	SULFATO FERROSO	0	0	0	0	1	3	0	0	0	2
860	20	6	31	2	1	ACIDO FOLICO SULFATO FERROSO	0	0	1	0	0	0	0	0	0	2
861	26	6	32	3	1	METILDOPA	1	0	0	0	0	6	1	0	0	2
862	24	3	35	1	0	PREDI	1	0	0	0	1	6	2	1	0	2
863	34	2	32	2	0	COMBIRON	0	0	1	0	0	3	0	0	0	2
864		3				INSULINA NPH INSULINA REGULAR	1	1	0	0	0	5	3	0	0	2
865	16	3	32	1	0	ACIDO FOLICO SULFATO FERROSO METILDOPA ACIDO ACETILSALICILICO	1	0	0	0	1	6	0	0	0	2
866	22	2	36	2	1	METILDOPA SULFATO FERROSO	1	0	0	0	0	3	0	0	0	2
867	38	1	38	2	0	MATERNA	0	0	0	0	1	2	0	0	0	2
868	19	4	33	1	0	INIBINA	1	0	1	0	0	7	1	1	1	2
869		42					1	1	0	0	1	19	12	6	1	2
870	20	1	37	1	0	METILDOPA	1	0	0	0	0	3	2	1	0	2
871	25	1	40	2	1		1	0	0	0	0	5			0	2
872	17	8	30	1	0	SULFATO FERROSO MATERNA	1	1	0	0	1	10	5	2	0	2
873		3	37	3	0		0	0	0	0	1	2	0	0	0	2
874		1					1	0	0	0	0	4	1	0	0	2
875		1					0	1	0	0	0	3	0	0	0	2
876	33	13	34	2	0	INIBINA	0	1	0	0	1	10	1	1	0	2
877	39	16	12	3	0		0	1	0	0	0	5	0	0	1	2
878	30	20	22	2	0	OMEPRAZOL	0	1	0	0	0	6	0	0	1	2
879		1					1	0	0	0	0	5	2	0	0	2
880	17	1	38	1	0	METILDOPA	1	0	0	0	0	3	1	0	0	2
881	18	23	31	2	0		1	0	1	0	0	8	2	2	0	2
882	24	1	36	1	0	METILDOPA	1	0	0	0	0	4	1	0	0	2
883	17	3	34	1	0		0	1	0	0	0	7	2	2	0	2
884	24	12	36	2	0		0	0	0	0	1	3	2	2	0	2
885	36	3	35	4	0	METILDOPA	0	1	0	0	0	4	0	0	0	2
886	20	1	40	2	1		0	0	0	0	1	2	0	0	0	2
887	33	5	20	2	1	METFORMINA	0	1	1	0	0	6	0	0	0	2
888		1	38	2	0		1	1	0	0	0	5	2	0	0	2
889		2	36	5	1		1	0	1	0	0	9	3	0	0	2
890		2	35	3	0		1	0	0	0	0	7	1	0	0	2
891	34	1	40	5	0	METILDOPA	1	0	0	0	0	3	1	0	0	2
892		1	38	1	0		1	0	0	0	0	3	1	0	0	2
893		1	28	3	0		0	0	1	0	0	2	0	0	0	2
894		3	34	2	0		0	0	1	0	0	4	1	1	0	2
895		1	34	2	0		0	0	1	0	0	4	0	0	0	2
896		1		7	0		1	0	0	0	0	2	0	0	0	2
897	26	16	20	1	0	ACIDO FOLICO SULFATO FERROSO	0	0	1	0	1	7	2	2	0	2
898		2					0	1	0	0	1	5	1	0	0	2
899	20	5	36	1	0	ACIDO FOLICO SULFATO FERROSO	0	0	1	0	0	3	0	0	0	2
900	29	1	38	3	1	METILDOPA	1	0	0	0	0	4	1	0	0	2
901	19	10	11	1	0	AMPLICTIL	0	0	0	0	1	5	2	2	1	2
902	20	3	29	2	0	ACIDO FOLICO SULFATO FERROSO	0	0	1	0	0	5	0	1	0	2
903	20	2	35	2	1		1	0	0	0	1	5	3	1	0	2
904	24	22	27	1	0	ACIDO FOLICO SULFATO FERROSO	1	0	0	0	1	11	2	1	1	2
905	36	5	34	1	0		0	0	0	1	1	5	1	1	0	2
906		1					0	0	0	0	1	5	2	0	0	2
907		8	37	1	0	METILDOPA SULFATO FERROSO	1	0	0	0	1	5	0	0	0	2
908	31	6		2	1	ACIDO FOLICO SULFATO FERROSO INSULINA NPH	1	1	0	0	0	7	4	0	0	2
909		3	30	2	0		0	0	1	0	0	4	1	1	0	2
910		2	32	4	1		1	0	1	0	0	5	1	1	0	2
911		1	27	2	1		1	0	1	0	0	3	0	0	0	2
912		4	12	3	0		0	0	0	1	0	5	1	0	0	2
913	15	4		1	0		1	0	0	0	1	8	1	0	0	2
914	26	2	38	1	0	CEFALEXINA METILDOPA	1	0	0	1	0	5	1	0	0	2
915	22	9	28	2	0		0	0	1	0	1	6	1	1	0	2
916		2					0	0	0	0	1	2	0	0	0	2
917		4	34	1	0		1	0	0	0	1	11	2	0	0	2
918		3	31	7	2	ACIDO FOLICO SULFATO FERROSO ESPIRAMICINA	1	1	0	0	0	3	0	0	0	2
919		8					0	1	0	0	0	7	1	0	0	2
920		3		4	1		1	0	0	0	1	8	2	1	0	2
921		2	35	3	0		1	0	0	0	0	4	1	0	0	2
922	25	2	37	3	0		0	1	1	0	1	3	0	0	0	2
923	17	10	14	2	0	BUSCOPAN	0	0	0	0	1	7	6	3	0	2
924	26	3		1	0	SULFATO FERROSO	1	0	0	0	1	5	4	1	1	2
925	20	1	28	1	0		1	0	0	0	1	5	2	1	1	2
926		7	38	1	0	ACIDO FOLICO SULFATO FERROSO	1	1	0	0	0	8	1	0	0	2
927	28	2	34	2	1		1	0	1	0	0	4	0	0	0	2
928	33	23	20	6	2	INSULINA NPH	0	1	0	0	0	5	0	0	0	2
929	35	4	35	5	1		0	0	1	0	0	5	2	2	1	2
930	21	4	35	1	0	SULFATO FERROSO	0	0	1	0	0	6	0	0	1	2
931	40	3	20	4	1	METFORMINA GLIBENCLAMIDA	0	1	0	0	0	5	0	0	0	2
932	17	1		1	0		1	0	0	0	0	6	2	0	0	2
933	22	10		8	1	SULFATO FERROSO METILDOPA	1	0	0	0	0	10	8	2	0	2
934	19	3		2	1	COMBIRON	1	0	0	0	1	4	0	0	0	2
935	27	4		1	0		0	1	0	0	0	6	4	0	0	2
936	31	4	10	3	0		0	0	0	0	1	6	1	0	0	2
937	28	4	23	1	0	ACIDO FOLICO SULFATO FERROSO	0	0	0	0	1	6	0	0	0	2
938	24	1	33	4	1	SULFATO FERROSO	0	0	1	0	0	2	0	0	0	2
939	30	1	29	2	0	ACIDO FOLICO SULFATO FERROSO	0	0	1	0	0	4	0	0	0	2
940		1					0	0	1	0	0	4	0	0	0	2
941		1	26	3	1	METILDOPA	1	0	0	0	0	5	1	1	0	2
942		1	21			CEFALEXINA	0	0	0	1	0	2	0	0	0	2
943		1	35	2	0		0	0	1	1	3	0	0	0	0	2
944		2	31	1	0		0	0	1	0	0	7	2	2	0	2
945		2	36				1	1	0	0	0	3	0	0	0	2
946		2	37				0	0	0	0	1	3	0	0	0	2
947	22	9	24	3	1		0	0	0	1	0	6	1	1	0	2
948	18	3	10	1	0		0	0	0	0	1	5	0	0	0	2
949	21	2		1	0	METILDOPA SULFATO FERROSO	1	0	0	0	0	3	1	0	0	2
950	16	2	31	2	0		0	0	1	0	0	5	1	1	0	2
951	18	3	36	3	0	ACIDO FOLICO SULFATO FERROSO DRAMIN	0	0	1	0	0	2	0	0	0	2
952		3	36				1	1	0	0	0	4	0	0	0	2
953		1					1	0	0	0	0	10	6	1	0	2
954	41	8	32	5	0	ACIDO FOLICO SULFATO FERROSO CARBAMAZEPINA	1	0	0	0	1	8	3	1	0	2
955		6					0	1	0	0	1	8	2	0	0	2
956		22	28	3	1		1	0	0	0	1	9	4	2	0	2
957	19	2	32	1	0	SULFATO FERROSO	0	0	1	0	0	7	0	0	0	2
958		9		2	0		0	0	1	0	0	11	6	2	0	2
959		6		3	0		1	0	0	0	1	8	3	0	0	2
960	17	5	36	1	0	HIDROXICLOROQUINA PREDNISONA	0	0	0	0	1	6	1	1	0	2
961	25	12	32	1	0		0	0	0	0	1	6	0	0	0	2
962	18	12	33	1	0	SULFATO FERROSO ESCOPOLAMINA	0	0	1	0	1	6	0	0	0	2
963	16	4	34	1	0	ACIDO FOLICO SULFATO FERROSO ESCOPOLAMINA	0	0	1	0	0	5	0	0	0	2
964	32	6	28	2	0	ACIDO FOLICO NIMESULIDA	0	0	0	0	1	4	0	0	0	2
965	22	3		1	0	ACIDO FOLICO SULFATO FERROSO	0	0	0	0	1	4	0	0	0	2
966	23	6	35	2	0		0	0	1	0	0	8	1	1	0	2
967		3	16				0	0	0	0	1	4	1	0	0	2
968	24	2	34	1	0	METILDOPA SULFATO FERROSO	1	0	0	0	0	5	0	0	0	2
969	24	4	34	3	0	ACIDO FOLICO SULFATO FERROSO METILDOPA ACIDO ACETILSALICILICO	1	1	0	0	0	7	1	1	0	2
970	16	2	37	1	0	SULFATO FERROSO/ÁCIDO FÓLICO	0	0	1	0	0	2	0	0	1	3
971	33	2	37	8	2	SULFATO FERROSO/METILDOPA	1	0	1	0	1	3	1	0	0	3
972	23	2	37	1	0	VITAMINA C/SULFATO FERROSO/ÁCIDO FÓLICO	0	0	1	0	0	3	0	0	1	3
973	23	4	37	2	0	AMPICIPILINA	0	0	1	1	0	2	0	0	1	3
974	27	8	14	6	1	METILDOPA/GLIBENCLAMIDA/METFORMINA	1	1	0	0	0	7	0	0	1	3
975	20	1	35	1	0	NITROFURANTOÍNA/SULFATO FERROSO	1	1	0	1	1	8	0	0	0	3
976	29	1	33	3	0	OMEPRAZOL/PREDNISONA/HIDROXICLOROQUINA	1	0	0	0	1	8	2	2	0	3
977	20	11	32	2	0	SULFATO FERROSO	0	0	1	0	0	7	1	1	0	3
978	29	1	37	4	0	BROMAZEPAM/NITROFURANTOÍNA	0	0	0	0	1	3	0	0	0	3
979		1					0	0	0	0	1	3	0	0	0	3
980		1					0	1	0	0	0	4	1	0	0	3
981	36	1		6	2	METILDOPA	0	0	0	0	1	4	2	0	0	3
982	21	1	29	4	2	ESCOPOLAMINA	0	0	0	0	1	5	2	1	0	3
983	26	1	33	2	0	SULFATO FERROSO	0	0	0	0	1	4	0	0	0	3
984	16	2		1	0		1	0	0	0	0	4	1	0	0	3
985		1					0	0	0	0	1	3	0	0	0	3
986	36	19	29	1	0	METILDOPA/NIFEDIPINO/POLIVITAMÍNICO		1	1	0	0	16	20	2	0	3
987	38	1	14	2	0	METILDOPA	1	0	0	0	1	5	0	0	0	3
988	29	1	34	3	0	METILDOPA	1	0	0	0	0	2	0	0	0	3
989	33	1	24	1	0	METILDOPA	1	0	0	0	1	2	0	0	0	3
990	26	1	33	4	1		1	0	1	0	0	3	0	0	0	3
991	14	10		1	0		1	0	0	0	1	6	3	1	1	3
992		1	37	1	0		1	0	0	0	0	4	1	0	0	3
993	35	3	35	2	0	POLIVITAMÍNICOS/POLIMINERAIS	1	0	1	0	0	3	0	0	1	3
994	20	14		1	0	METILDOPA/SULFATO FERROSO/ÁCIDO FÓLICO	1	0	0	1	1	12	6	2	2	3
995	18	2	37	1	0	METILDOPA	1	0	0	0	0	3	1	0	0	3
996	17	5	25	2	0	ÁCIDO FÓLICO	0	0	0	1	0	5	0	0	0	3
997	23	2	38	1	0	SULFATO FERROSO/ÁCIDO FÓLICO	1	0	0	0	0	3	0	0	0	3
998	28	21	29				1	1	0	0	1	15	1	1	0	3
999	21	5	32	3	1	SULFATO FERROSO/ÁCIDO FÓLICO	0	0	1	0	0	4	1	1	0	3
1000		2					1	0	0	0	0	9	5	3	0	3
1001		2	31	1	0		0	0	0	0	1	2	0	0	0	3
1002		2	34	6	1		0	0	0	1	0	2	0	0	0	3
1003		2					1	0	0	0	0	6	2	0	0	3
1004	22	11	37	1	0	CEFALEXINA/NITROFURANTOÍNA	0	0	0	1	0	5	0	0	1	3
1005	22	4	34	1	0	SULFATO FERROSO	0	0	0	1	0	4	1	1	0	3
1006	28	2		1	0	POLIVITAMÍNICOS	1	0	0	0	1	4	1	0	1	3
1007	30	3	34	4	0		1	0	1	0	0	4	1	1	0	3
1008	33	3	32	6	1	HIDRÓXIDO DE MAGNÉSIO/ALUMÍNIO/CARBONATO	0	0	0	0	1	2	0	0	0	3
1009	27	1		1	0	SULFATO FERROSO/ÁCIDO FÓLICO	0	0	1	0	0	2	0	0	0	3
1010	17	1		2	0		0	0	0	0	1	2	0	0	0	3
1011		1					1	0	0	0	0	4	1	0	0	3
1012	26	1	33	4	1	CEFALEXINA	0	0	1	0	1	2	0	0	0	3
1013	16	1	42	1	0	SULFATO FERROSO	0	0	1	0	1	3	0	0	0	3
1014	16	7	37	1	0	CEFALEXINA	0	0	0	1	0	4	0	0	0	3
1015	25	7	32	2	1	NEBIVOLOL	1	0	1	0	0	5	2	0	0	3
1016		19	32	5	0		0	1	0	0	0	8	1	1	0	3
1017	19	8	35	1	0		0	0	1	0	0	6	0	0	0	3
1018		1					1	0	0	0	1	5	0	0	0	3
1019	30	12	33	2	0	METFORMINA	0	1	0	0	0	7	0	0	0	3
1020	21	9	36	2	1	METILDOPA/POLIVITAMÍNICO	1	0	0	0	0	4	1	0	0	3
1021	30	3	37	2	0	SULFATO FERROSO/METILDOPA	1	1	0	0	0	8	3	0	0	3
1022	25	3	33	5	4	INSULINA NPH/INSULINA REGULAR	0	1	0	0	0	4	0	0	0	3
1023	17	3	28	1	0		1	0	1	0	0	3	0	0	0	3
1024	24	3	33	3	1		0	0	1	0	0	7	3	2	0	3
1025	26	3	31	2	0		0	0	0	0	1	5	1	0	0	3
1026	23	3	37	1	0	SULFATO FERROSO	0	0	1	0	0	5	1	1	0	3
1027		2					1	1	0	0	0	7	4	1	0	3
1028		15	35				0	0	0	1	0	9	1	0	0	3
1029	22	7	32	2	0	SULFATO FERROSO/ÁCIDO FÓLICO	0	0	1	1	0	8	1	1	0	3
1030	18	3	30	3	2		1	0	0	1	0	6	2	2	0	3
1031	27	1		1	0	SULFATO FERROSO	1	0	0	0	1	3	1	0	0	3
1032	27	6	36	3	0	METILDOPA	1	1	0	0	1	7	2	0	0	3
1033	24	9	34	1	0	SULFATO FERROSO	1	0	0	0	0	7	2	0	0	3
1034		1					1	0	0	0	0	3	1	0	0	3
1035		1					0	0	0	0	0	2	0	0	0	3
1036	19	1		1	0	SULFATO FERROSO/ÁCIDO FÓLICO	1	0	0	0	0	4	1	0	0	3
1037		4	36	2	0		1	1	0	0	1	11	3	2	0	3
1038		12	13				1	0	0	0	1	10	7	4	0	3
1039	29	4	32	3	1	SULFATO FERROSO	1	0	1	0	0	3	0	0	0	3
1040		2					0	1	1	0	0	4	1	0	0	3
1041	15	10	33	1	0	SULFATO FERROSO/ÁCIDO FÓLICO/NISTATINA	1	0	1	1	0	7	0	0	0	3
1042	32	73	24	1	0	NIFEDIPINO/PROGESTERONA/SULFATO FERROSO/ÁCIDO FÓLICO	1	0	0	0	1	16	8	3	0	3
1043	33	2	37	4	2	METILDOPA/NIFEDIPINO/AAS/SULFATO FERROSO	1	0	0	0	1	5	0	0	0	3
1044		7					1	0	1	0	0	7	1	0	0	3
1045	29	1	41	2	0		1	0	0	0	0	5	0	0	0	3
1046		3	11	3	0		0	0	0	0	1	4	1	1	1	3
1047		4	31	1	0	METILDOPA/SULFATO FERROSO	1	0	1	0	0	6	1	1	0	3
1048	23	4	33	2	0	SULFATO FERROSO	1	0	0	0	1	4	0	0	0	3
1049	19	10	37	1	0	MECLIZINA/DIMENIDRINATO	0	0	0	0	1	6	1	1	1	3
1050	24	2	37	2	0	ESCOPOLAMINA/POLIVITAMÍNICOS	1	0	1	0	0	6	1	1	0	3
1051		2					1	0	0	0	0	4	1	0	0	3
1052		5	29	2	0		0	0	0	1	0	6	0	0	0	3
1053	26	15	35	3	0	SULFATO FERROSO/METILDOPA	1	0	0	0	0	5	0	0	0	3
1054		5	36	4	1		1	0	0	1	0	7	0	0	0	3
1055		4	11	3	0	DIMENIDRINATO/ÁCIDO FÓLICO/ONDANSETRONA	0	0	0	0	1	4	0	0	0	3
1056	33	19	37	3	0	ENOXAPARINA	1	1	0	0	1	15	7	1	0	3
1057		3		1	0		1	0	0	0	1	4	1	0	0	3
1058	23	5	35	1	0	SULFATO FERROSO/ÁCIDO FÓLICO	0	0	0	1	0	3	0	0	0	3
1059		1	34	1	0		1	0	0	0	1	4	0	0	0	3
1060	30	5	36	3	0		1	0	1	0	0	5	1	1	0	3
1061	36	3	32	4	1	METILDOPA	1	1	0	0	0	6	0	0	0	3
1062	42	2	25	3	1		1	0	1	1	0	4	1	1	0	3
1063	27	11	26	2	0	PROGESTERONA/ESCOPOLAMINA/SULFATO FERROSO/ÁCIDO FÓLICO	1	0	1	0	0	9	0	0	0	3
1064	21	2		2	0		1	0	0	0	1	6	1	0	0	3
1065	35	4		5	1	METILDOPA	1	1	0	0	0	5	2	0	0	3
1066	35	19	26	3	0	METILDOPA	1	1	0	0	0	7	1	0	0	3
1067	21	4	27	2	0	SULFATO FERROSO/ÁCIDO FÓLICO	0	0	1	0	0	5	1	1	0	3
1068	18	5	28	1	0		0	0	0	1	0	5	1	1	0	3
1069		2	33	2	1		1	0	0	0	0	5	1	0	0	3
1070	28	17	26	1	0	METILDOPA/ONDASENTRONA/RANITIDINA/INSULINA	1	1	0	0	1	13	2	0	0	3

## Sheet: med
pac	med	intleves	intmod	intgrave	ram	tram	rend	rresp	rcard	rrenal	rgastro	rnervo	rocular	rcirc	rhepa	nram
1	BETAMETASONA			1			0	0	0	0	0	0	0	0	0	0
1	ESCOPOLAMINA						0	0	0	0	0	0	0	0	0	0
1	DIPIRONA			1			0	0	0	0	0	0	0	0	0	0
1	HIDRALAZINA						0	0	0	0	0	0	0	0	0	0
1	INSULINA NPH				1	HIPOGLICEMIA	1	0	0	0	0	0	0	0	0	1
1	INSULINA REGULAR						0	0	0	0	0	0	0	0	0	0
1	METILDOPA						0	0	0	0	0	0	0	0	0	0
1	DOMPERIDONA						0	0	0	0	0	0	0	0	0	0
2	NIFEDIPINO						0	0	0	0	0	0	0	0	0	0
2	DIPIRONA		1				0	0	0	0	0	0	0	0	0	0
2	METOCLOPRAMIDA IV						0	0	0	0	0	0	0	0	0	0
2	CAPTOPRIL		1		1	TOSSE	0	1	0	0	0	0	0	0	0	1
2	ONDASENTRONA						0	0	0	0	0	0	0	0	0	0
2	METILDOPA						0	0	0	0	0	0	0	0	0	0
3	NIFEDIPINO						0	0	0	0	0	0	0	0	0	0
3	BETAMETASONA IM			1			0	0	0	0	0	0	0	0	0	0
3	ESCOPOLAMINA				1	TAQUICARDIA	0	0	1	0	0	0	0	0	0	1
3	DIPIRONA			1			0	0	0	0	0	0	0	0	0	0
3	ONDASENTRONA						0	0	0	0	0	0	0	0	0	0
3	PARACETAMOL						0	0	0	0	0	0	0	0	0	0
3	RANITIDINA						0	0	0	0	0	0	0	0	0	0
3	NISTATINA						0	0	0	0	0	0	0	0	0	0
4	CEFALEXINA						0	0	0	0	0	0	0	0	0	0
4	ESCOPOLAMINA						0	0	0	0	0	0	0	0	0	0
4	DIPIRONA						0	0	0	0	0	0	0	0	0	0
5	SIMETICONA						0	0	0	0	0	0	0	0	0	0
5	DIPIRONA						0	0	0	0	0	0	0	0	0	0
6	ONDASENTRONA						0	0	0	0	0	0	0	0	0	0
6	METILDOPA						0	0	0	0	0	0	0	0	0	0
6	CEFAZOLINA IV						0	0	0	0	0	0	0	0	0	0
6	DIPIRONA IV		1				0	0	0	0	0	0	0	0	0	0
6	ESCOPOLAMINA						0	0	0	0	0	0	0	0	0	0
6	HIDRALAZINA IV						0	0	0	0	0	0	0	0	0	0
6	LEVOMEPROMAZINA						0	0	0	0	0	0	0	0	0	0
6	RANITIDINA IV						0	0	0	0	0	0	0	0	0	0
6	CEFALEXINA						0	0	0	0	0	0	0	0	0	0
6	CAPTOPRIL		1				0	0	0	0	0	0	0	0	0	0
6	CARBOCISTEINA						0	0	0	0	0	0	0	0	0	0
6	SIMETICONA						0	0	0	0	0	0	0	0	0	0
7	BETAMETASONA IM						0	0	0	0	0	0	0	0	0	0
7	ESCOPOLAMINA						0	0	0	0	0	0	0	0	0	0
7	NIFEDIPINO						0	0	0	0	0	0	0	0	0	0
8	CAPTOPRIL		1				0	0	0	0	0	0	0	0	0	0
8	SIMETICONA						0	0	0	0	0	0	0	0	0	0
8	DIPIRONA		1	1			0	0	0	0	0	0	0	0	0	0
8	NIFEDIPINO						0	0	0	0	0	0	0	0	0	0
8	TENOXICAM IV		1	1			0	0	0	0	0	0	0	0	0	0
8	CAFEINA						0	0	0	0	0	0	0	0	0	0
8	CITRATO DE ORFENADRINA			1			0	0	0	0	0	0	0	0	0	0
8	HIDROCORTIZONA IV			1			0	0	0	0	0	0	0	0	0	0
8	NIFEDIPINO RETARD						0	0	0	0	0	0	0	0	0	0
8	TRAMADOL			1			0	0	0	0	0	0	0	0	0	0
8	ESCOPOLAMINA						0	0	0	0	0	0	0	0	0	0
9	DIPIRONA		1	1			0	0	0	0	0	0	0	0	0	0
9	FUROSEMIDA			1			0	0	0	0	0	0	0	0	0	0
9	SULFATO FERROSO						0	0	0	0	0	0	0	0	0	0
9	CAPTOPRIL		1				0	0	0	0	0	0	0	0	0	0
10	SIMETICONA						0	0	0	0	0	0	0	0	0	0
10	DIPIRONA						0	0	0	0	0	0	0	0	0	0
10	INSULINA NPH		1				0	0	0	0	0	0	0	0	0	0
10	INSULINA REGULAR		1				0	0	0	0	0	0	0	0	0	0
10	GLIBENCLAMIDA						0	0	0	0	0	0	0	0	0	0
10	METFORMINA		1				0	0	0	0	0	0	0	0	0	0
11	NIFEDIPINO RETARD						0	0	0	0	0	0	0	0	0	0
11	ESCOPOLAMINA IV						0	0	0	0	0	0	0	0	0	0
11	BETAMETASONA IM						0	0	0	0	0	0	0	0	0	0
12	ESCOPOLAMINA						0	0	0	0	0	0	0	0	0	0
12	INSULINA REGULAR						0	0	0	0	0	0	0	0	0	0
13	INSULINA REGULAR						0	0	0	0	0	0	0	0	0	0
13	INSULINA NPH						0	0	0	0	0	0	0	0	0	0
13	ESCOPOLAMINA						0	0	0	0	0	0	0	0	0	0
13	DIPIRONA						0	0	0	0	0	0	0	0	0	0
14	SIMETICONA						0	0	0	0	0	0	0	0	0	0
14	DIPIRONA			1			0	0	0	0	0	0	0	0	0	0
14	INSULINA NPH						0	0	0	0	0	0	0	0	0	0
14	INSULINA REGULAR						0	0	0	0	0	0	0	0	0	0
14	FORMOTEROL DIIDRATADO FUMARATO						0	0	0	0	0	0	0	0	0	0
14	BUDENOSIDA			1			0	0	0	0	0	0	0	0	0	0
15	OCITOCINA						0	0	0	0	0	0	0	0	0	0
15	DIPIRONA		1				0	0	0	0	0	0	0	0	0	0
15	DIPIRONA IV		1				0	0	0	0	0	0	0	0	0	0
15	METOCLOPRAMIDA IV						0	0	0	0	0	0	0	0	0	0
15	CAPTOPRIL		1				0	0	0	0	0	0	0	0	0	0
15	SIMETICONA						0	0	0	0	0	0	0	0	0	0
16	CAPTOPRIL		1				0	0	0	0	0	0	0	0	0	0
16	SIMETICONA						0	0	0	0	0	0	0	0	0	0
16	DIPIRONA		1				0	0	0	0	0	0	0	0	0	0
16	NIFEDIPINO						0	0	0	0	0	0	0	0	0	0
16	LEVOMEPROMAZINA						0	0	0	0	0	0	0	0	0	0
17	CEFAZOLINA						0	0	0	0	0	0	0	0	0	0
17	DIPIRONA IV						0	0	0	0	0	0	0	0	0	0
17	CEFALEXINA						0	0	0	0	0	0	0	0	0	0
17	ONDANSETRONA IV						0	0	0	0	0	0	0	0	0	0
17	RANITIDINA IV						0	0	0	0	0	0	0	0	0	0
18	DIPIRONA		1				0	0	0	0	0	0	0	0	0	0
18	SULFATO FERROSO						0	0	0	0	0	0	0	0	0	0
18	CAPTOPRIL		1				0	0	0	0	0	0	0	0	0	0
18	LEVOMEPROMAZINA						0	0	0	0	0	0	0	0	0	0
18	NIFEDIPINO						0	0	0	0	0	0	0	0	0	0
19	HIDRALAZINA IV						0	0	0	0	0	0	0	0	0	0
19	DIPIRONA IV			1			0	0	0	0	0	0	0	0	0	0
19	DIPIRONA			1			0	0	0	0	0	0	0	0	0	0
19	METILDOPA						0	0	0	0	0	0	0	0	0	0
19	METOCLOPRAMIDA						0	0	0	0	0	0	0	0	0	0
19	HEPARINA			1			0	0	0	0	0	0	0	0	0	0
19	CEFALEXINA						0	0	0	0	0	0	0	0	0	0
19	ESCOPOLAMINA						0	0	0	0	0	0	0	0	0	0
19	CARBOCISTEINA						0	0	0	0	0	0	0	0	0	0
20	ESCOPOLAMINA						0	0	0	0	0	0	0	0	0	0
20	DIPIRONA						0	0	0	0	0	0	0	0	0	0
20	NIFEDIPINO						0	0	0	0	0	0	0	0	0	0
21	OCITOCINA						0	0	0	0	0	0	0	0	0	0
21	METOCLOPRAMIDA IV						0	0	0	0	0	0	0	0	0	0
21	DIPIRONA IV						0	0	0	0	0	0	0	0	0	0
21	INSULINA REGULAR						0	0	0	0	0	0	0	0	0	0
22	ESCOPOLAMINA						0	0	0	0	0	0	0	0	0	0
22	DIPIRONA			1			0	0	0	0	0	0	0	0	0	0
22	HIDRALAZINA						0	0	0	0	0	0	0	0	0	0
22	METILDOPA		1				0	0	0	0	0	0	0	0	0	0
22	NIFEDIPINO						0	0	0	0	0	0	0	0	0	0
22	LEVOMEPROMAZINA						0	0	0	0	0	0	0	0	0	0
22	SULFATO FERROSO		1				0	0	0	0	0	0	0	0	0	0
22	HIDROCLOROTIAZIDA			1			0	0	0	0	0	0	0	0	0	0
23	LOSARTANA		1				0	0	0	0	0	0	0	0	0	0
23	HIDROCLOROTIAZIDA			1			0	0	0	0	0	0	0	0	0	0
23	DIPIRONA		1	1			0	0	0	0	0	0	0	0	0	0
24	CEFAZOLINA						0	0	0	0	0	0	0	0	0	0
24	BETAMETASONA IM			1			0	0	0	0	0	0	0	0	0	0
24	OLEO MINERAL						0	0	0	0	0	0	0	0	0	0
24	PARACETAMOL						0	0	0	0	0	0	0	0	0	0
24	NIFEDIPINO RETARD						0	0	0	0	0	0	0	0	0	0
24	ESCOPOLAMINA						0	0	0	0	0	0	0	0	0	0
24	DIPIRONA			1			0	0	0	0	0	0	0	0	0	0
25	DIPIRONA		1				0	0	0	0	0	0	0	0	0	0
25	HIDRALAZINA						0	0	0	0	0	0	0	0	0	0
25	RANITIDINA						0	0	0	0	0	0	0	0	0	0
25	METILDOPA						0	0	0	0	0	0	0	0	0	0
25	CAPTROPIL		1				0	0	0	0	0	0	0	0	0	0
25	SIMETICONA						0	0	0	0	0	0	0	0	0	0
26	ESCOPOLAMINA						0	0	0	0	0	0	0	0	0	0
26	PROPRANOLOL						0	0	0	0	0	0	0	0	0	0
27	CAPTOPRIL		1				0	0	0	0	0	0	0	0	0	0
27	SIMETICONA						0	0	0	0	0	0	0	0	0	0
27	DIPIRONA		1				0	0	0	0	0	0	0	0	0	0
27	NIFEDIPINO RETARD						0	0	0	0	0	0	0	0	0	0
27	NIFEDIPINO						0	0	0	0	0	0	0	0	0	0
27	LEVOMEPROMAZINA						0	0	0	0	0	0	0	0	0	0
28	CAPTOPRIL						0	0	0	0	0	0	0	0	0	0
28	SIMETICONA						0	0	0	0	0	0	0	0	0	0
28	PARACETAMOL						0	0	0	0	0	0	0	0	0	0
28	ENOXAPARINA						0	0	0	0	0	0	0	0	0	0
28	TRAMADOL IV						0	0	0	0	0	0	0	0	0	0
29	CAPTOPRIL		1				0	0	0	0	0	0	0	0	0	0
29	DIPIRONA		1				0	0	0	0	0	0	0	0	0	0
29	INSULINA REGULAR		1				0	0	0	0	0	0	0	0	0	0
29	INSULINA NPH		1				0	0	0	0	0	0	0	0	0	0
29	ONDANSETRONA IV						0	0	0	0	0	0	0	0	0	0
30	BETAMETASONA IM			1			0	0	0	0	0	0	0	0	0	0
30	ESCOPOLAMINA						0	0	0	0	0	0	0	0	0	0
30	DIPIRONA			1			0	0	0	0	0	0	0	0	0	0
31	CAPTOPRIL		1				0	0	0	0	0	0	0	0	0	0
31	SIMETICONA						0	0	0	0	0	0	0	0	0	0
31	DIPIRONA		1				0	0	0	0	0	0	0	0	0	0
31	LEVOTIROXINA						0	0	0	0	0	0	0	0	0	0
31	OLEO MINERAL						0	0	0	0	0	0	0	0	0	0
31	FLEET ENEMA						0	0	0	0	0	0	0	0	0	0
32	INSULINA NPH						0	0	0	0	0	0	0	0	0	0
32	INSULINA REGULAR						0	0	0	0	0	0	0	0	0	0
32	SULFATO FERROSO						0	0	0	0	0	0	0	0	0	0
32	FOSFOMICINA						0	0	0	0	0	0	0	0	0	0
32	DIPIRONA			1			0	0	0	0	0	0	0	0	0	0
32	BETAMETASONA IM			1			0	0	0	0	0	0	0	0	0	0
32	GLICOSE						0	0	0	0	0	0	0	0	0	0
32	NITROFURANTOINA						0	0	0	0	0	0	0	0	0	0
33	BETAMETASONA IM						0	0	0	0	0	0	0	0	0	0
33	ESCOPOLAMINA						0	0	0	0	0	0	0	0	0	0
33	HIDRALAZINA						0	0	0	0	0	0	0	0	0	0
33	SULFATO FERROSO						0	0	0	0	0	0	0	0	0	0
34	DIPIRONA						0	0	0	0	0	0	0	0	0	0
34	NIFEDIPINO						0	0	0	0	0	0	0	0	0	0
35	ACIDO FOLICO						0	0	0	0	0	0	0	0	0	0
35	ESCOPOLAMINA						0	0	0	0	0	0	0	0	0	0
35	LEVOTIROXINA		1				0	0	0	0	0	0	0	0	0	0
35	SULFATO FERROSO		1				0	0	0	0	0	0	0	0	0	0
35	NISTATINA						0	0	0	0	0	0	0	0	0	0
35	DIPIRONA			1	1	HIPOTENSAO	0	0	1	0	0	0	0	0	0	1
35	BETAMETASONA IM			1			0	0	0	0	0	0	0	0	0	0
35	SIMETICONA		1				0	0	0	0	0	0	0	0	0	0
36	BETAMETASONA IM			1	1	TONTURA	0	0	0	0	0	1	0	0	0	1
36	DIPIRONA IV			1			0	0	0	0	0	0	0	0	0	0
36	ESCOPOLAMINA						0	0	0	0	0	0	0	0	0	0
36	HIDRALAZINA						0	0	0	0	0	0	0	0	0	0
36	METILDOPA						0	0	0	0	0	0	0	0	0	0
37	NISTATINA IV						0	0	0	0	0	0	0	0	0	0
37	ACIDO FOLICO		1				0	0	0	0	0	0	0	0	0	0
37	DIAZEPAM IV			1			0	0	0	0	0	0	0	0	0	0
37	FENOBARBITAL	1	1	1			0	0	0	0	0	0	0	0	0	0
37	CARBAMAZEPINA		1	1			0	0	0	0	0	0	0	0	0	0
37	FENITOINA	1	1	1			0	0	0	0	0	0	0	0	0	0
37	ONDANSETRONA IV						0	0	0	0	0	0	0	0	0	0
37	PARACETAMOL		1				0	0	0	0	0	0	0	0	0	0
37	SERTRALINA			1			0	0	0	0	0	0	0	0	0	0
37	DIPIRONA						0	0	0	0	0	0	0	0	0	0
38	DIPIRONA						0	0	0	0	0	0	0	0	0	0
39	CEFTRIAXONA						0	0	0	0	0	0	0	0	0	0
39	DIPIRONA						0	0	0	0	0	0	0	0	0	0
39	METOCLOPRAMIDA						0	0	0	0	0	0	0	0	0	0
39	SULFATO FERROSO						0	0	0	0	0	0	0	0	0	0
40	SIMETICONA						0	0	0	0	0	0	0	0	0	0
40	DIPIRONA						0	0	0	0	0	0	0	0	0	0
41	CAPTOPRIL		1				0	0	0	0	0	0	0	0	0	0
41	SIMETICONA						0	0	0	0	0	0	0	0	0	0
41	DIPIRONA		1	1			0	0	0	0	0	0	0	0	0	0
41	NIFEDIPINO						0	0	0	0	0	0	0	0	0	0
41	SULFATO FERROSO						0	0	0	0	0	0	0	0	0	0
41	OLEO MINERAL						0	0	0	0	0	0	0	0	0	0
41	HIDROCLOROTIAZIDA		1	1			0	0	0	0	0	0	0	0	0	0
41	LEVOMEPROMAZINA						0	0	0	0	0	0	0	0	0	0
42	BETAMETASONA IM			1			0	0	0	0	0	0	0	0	0	0
42	ESCOPOLAMINA						0	0	0	0	0	0	0	0	0	0
42	DIPIRONA		1	1			0	0	0	0	0	0	0	0	0	0
42	HIDRALAZINA						0	0	0	0	0	0	0	0	0	0
42	METILDOPA						0	0	0	0	0	0	0	0	0	0
42	CAPTOPRIL		1				0	0	0	0	0	0	0	0	0	0
42	SIMETICONA						0	0	0	0	0	0	0	0	0	0
42	OLEO MINERAL						0	0	0	0	0	0	0	0	0	0
42	NIFEDIPINO						0	0	0	0	0	0	0	0	0	0
43	CEFTRIAXONA						0	0	0	0	0	0	0	0	0	0
43	DIPIRONA IV						0	0	0	0	0	0	0	0	0	0
43	INSULINA NPH						0	0	0	0	0	0	0	0	0	0
43	INSULINA REGULAR						0	0	0	0	0	0	0	0	0	0
43	METOCLOPRAMIDA						0	0	0	0	0	0	0	0	0	0
44	BETAMETASONA IM			1			0	0	0	0	0	0	0	0	0	0
44	ESCOPOLAMINA						0	0	0	0	0	0	0	0	0	0
44	DIPIRONA			1			0	0	0	0	0	0	0	0	0	0
44	NIFEDIPINO RETARD						0	0	0	0	0	0	0	0	0	0
45	BETAMETASONA IM						0	0	0	0	0	0	0	0	0	0
45	ESCOPOLAMINA						0	0	0	0	0	0	0	0	0	0
45	ESCOPOLAMINA IV						0	0	0	0	0	0	0	0	0	0
45	METOCLOPRAMIDA IV						0	0	0	0	0	0	0	0	0	0
46	CAPTOPRIL						0	0	0	0	0	0	0	0	0	0
46	SIMETICONA						0	0	0	0	0	0	0	0	0	0
46	PARACETAMOL						0	0	0	0	0	0	0	0	0	0
47	NISTATINA						0	0	0	0	0	0	0	0	0	0
47	ESCOPOLAMINA						0	0	0	0	0	0	0	0	0	0
47	DIPIRONA						0	0	0	0	0	0	0	0	0	0
47	INSULINA REGULAR						0	0	0	0	0	0	0	0	0	0
47	NIFEDIPINO						0	0	0	0	0	0	0	0	0	0
48	CAPTOPRIL		1				0	0	0	0	0	0	0	0	0	0
48	SIMETICONA						0	0	0	0	0	0	0	0	0	0
48	DIPIRONA		1				0	0	0	0	0	0	0	0	0	0
49	CAPTOPRIL		1				0	0	0	0	0	0	0	0	0	0
49	SIMETICONA						0	0	0	0	0	0	0	0	0	0
49	DIPIRONA		1				0	0	0	0	0	0	0	0	0	0
50	GLICOSE						0	0	0	0	0	0	0	0	0	0
51	ESCOPOLAMINA						0	0	0	0	0	0	0	0	0	0
51	INSULINA NPH		1				0	0	0	0	0	0	0	0	0	0
51	INSULINA REGULAR		1				0	0	0	0	0	0	0	0	0	0
51	METILDOPA						0	0	0	0	0	0	0	0	0	0
51	CAPTOPRIL		1				0	0	0	0	0	0	0	0	0	0
51	CETOPROFENO		1	1			0	0	0	0	0	0	0	0	0	0
51	DIMETICONA						0	0	0	0	0	0	0	0	0	0
51	DIPIRONA		1	1			0	0	0	0	0	0	0	0	0	0
52	CAPTOPRIL		1				0	0	0	0	0	0	0	0	0	0
52	DIMETICONA						0	0	0	0	0	0	0	0	0	0
52	DIPIRONA		1				0	0	0	0	0	0	0	0	0	0
52	SOTALOL		1				0	0	0	0	0	0	0	0	0	0
53	ESCOPOLAMINA						0	0	0	0	0	0	0	0	0	0
53	DIPIRONA						0	0	0	0	0	0	0	0	0	0
53	HIDRALAZINA IV						0	0	0	0	0	0	0	0	0	0
53	METILDOPA						0	0	0	0	0	0	0	0	0	0
53	NIFEDIPINO RETARD						0	0	0	0	0	0	0	0	0	0
54	CAPTOPRIL		1				0	0	0	0	0	0	0	0	0	0
54	OCITOCINA IV						0	0	0	0	0	0	0	0	0	0
54	METOCLOPRAMIDA IV						0	0	0	0	0	0	0	0	0	0
54	DIPIRONA IV		1				0	0	0	0	0	0	0	0	0	0
54	DIMETICONA						0	0	0	0	0	0	0	0	0	0
54	PARACETAMOL						0	0	0	0	0	0	0	0	0	0
54	NIFEDIPINO RETARD						0	0	0	0	0	0	0	0	0	0
55	CAPTOPRIL		1				0	0	0	0	0	0	0	0	0	0
55	DIMETICONA						0	0	0	0	0	0	0	0	0	0
55	DIPIRONA		1				0	0	0	0	0	0	0	0	0	0
55	PARACETAMOL						0	0	0	0	0	0	0	0	0	0
56	ESCOPOLAMINA						0	0	0	0	0	0	0	0	0	0
56	INSULINA REGULAR		1				0	0	0	0	0	0	0	0	0	0
56	CEFTRIAXONA						0	0	0	0	0	0	0	0	0	0
56	CEFTRIAXONA						0	0	0	0	0	0	0	0	0	0
56	DIMETICONA						0	0	0	0	0	0	0	0	0	0
56	DIPIRONA		1				0	0	0	0	0	0	0	0	0	0
56	SULFATO FERROSO						0	0	0	0	0	0	0	0	0	0
56	CAPTOPRIL		1				0	0	0	0	0	0	0	0	0	0
57	DIMETICONA						0	0	0	0	0	0	0	0	0	0
57	DIPIRONA						0	0	0	0	0	0	0	0	0	0
57	INSULINA REGULAR						0	0	0	0	0	0	0	0	0	0
58	ESCOPOLAMINA						0	0	0	0	0	0	0	0	0	0
58	LEVOTIROXINA						0	0	0	0	0	0	0	0	0	0
59	ESCOPOLAMINA						0	0	0	0	0	0	0	0	0	0
59	DIPIRONA						0	0	0	0	0	0	0	0	0	0
59	INSULINA REGULAR						0	0	0	0	0	0	0	0	0	0
60	BETAMETASONA						0	0	0	0	0	0	0	0	0	0
60	PARACETAMOL						0	0	0	0	0	0	0	0	0	0
61	DIPIRONA IV						0	0	0	0	0	0	0	0	0	0
61	ONDASETRONA		1				0	0	0	0	0	0	0	0	0	0
61	TRAMADOL		1				0	0	0	0	0	0	0	0	0	0
62	NISTATINA						0	0	0	0	0	0	0	0	0	0
62	ESCOPOLAMINA						0	0	0	0	0	0	0	0	0	0
62	HIDRALAZINA IV						0	0	0	0	0	0	0	0	0	0
62	METILDOPA						0	0	0	0	0	0	0	0	0	0
63	CAPTOPRIL		1				0	0	0	0	0	0	0	0	0	0
63	SIMETICONA						0	0	0	0	0	0	0	0	0	0
63	DIPIRONA		1				0	0	0	0	0	0	0	0	0	0
64	BETAMETASONA IM			1			0	0	0	0	0	0	0	0	0	0
64	DIPIRONA			1			0	0	0	0	0	0	0	0	0	0
64	ESCOPOLAMINA						0	0	0	0	0	0	0	0	0	0
65	CAPTOPRIL		1				0	0	0	0	0	0	0	0	0	0
65	SIMETICONA						0	0	0	0	0	0	0	0	0	0
65	DIPIRONA		1				0	0	0	0	0	0	0	0	0	0
66	ACIDO FOLICO						0	0	0	0	0	0	0	0	0	0
66	BETAMETASONA			1			0	0	0	0	0	0	0	0	0	0
66	DIPIRONA			1			0	0	0	0	0	0	0	0	0	0
66	SULFATO FERROSO						0	0	0	0	0	0	0	0	0	0
67	BETAMETASONA IM			1			0	0	0	0	0	0	0	0	0	0
67	DIPIRONA			1			0	0	0	0	0	0	0	0	0	0
67	SULFATO FERROSO						0	0	0	0	0	0	0	0	0	0
67	CEFAZOLINA						0	0	0	0	0	0	0	0	0	0
67	RANITIDINA						0	0	0	0	0	0	0	0	0	0
67	INSULINA NPH						0	0	0	0	0	0	0	0	0	0
67	INSULINA REGULAR						0	0	0	0	0	0	0	0	0	0
67	NISTATINA						0	0	0	0	0	0	0	0	0	0
68	ESCOPOLAMINA						0	0	0	0	0	0	0	0	0	0
68	DIPIRONA						0	0	0	0	0	0	0	0	0	0
69	ESCOPOLAMINA						0	0	0	0	0	0	0	0	0	0
69	DIPIRONA						0	0	0	0	0	0	0	0	0	0
70	CAPTOPRIL		1				0	0	0	0	0	0	0	0	0	0
70	SIMETICONA						0	0	0	0	0	0	0	0	0	0
70	DIPIRONA		1				0	0	0	0	0	0	0	0	0	0
70	SULFATO FERROSO						0	0	0	0	0	0	0	0	0	0
71	DIPIRONA						0	0	0	0	0	0	0	0	0	0
71	ESCOPOLAMINA IV						0	0	0	0	0	0	0	0	0	0
72	CEFEPIME IV						0	0	0	0	0	0	0	0	0	0
72	METRONIDAZOL IV			1			0	0	0	0	0	0	0	0	0	0
72	DIPIRONA IV			1			0	0	0	0	0	0	0	0	0	0
72	ENOXAPARINA IV			1			0	0	0	0	0	0	0	0	0	0
72	ONDASETRONA IV		1	1			0	0	0	0	0	0	0	0	0	0
72	SULFATO FERROSO						0	0	0	0	0	0	0	0	0	0
72	ESCOPOLAMINA IV						0	0	0	0	0	0	0	0	0	0
72	TRAMADOL IV		1				0	0	0	0	0	0	0	0	0	0
72	OLEO MINERAL						0	0	0	0	0	0	0	0	0	0
73	CAPTOPRIL		1				0	0	0	0	0	0	0	0	0	0
73	SIMETICONA						0	0	0	0	0	0	0	0	0	0
73	DIPIRONA		1				0	0	0	0	0	0	0	0	0	0
73	SULFATO FERROSO						0	0	0	0	0	0	0	0	0	0
74	DIMETICONA						0	0	0	0	0	0	0	0	0	0
74	DIPIRONA						0	0	0	0	0	0	0	0	0	0
74	INSULINA NPH		1				0	0	0	0	0	0	0	0	0	0
74	INSULINA REGULAR		1				0	0	0	0	0	0	0	0	0	0
74	LEVOTIROXINA						0	0	0	0	0	0	0	0	0	0
74	LEVOMEPROMAZINA						0	0	0	0	0	0	0	0	0	0
75	HIDRALAZINA IV						0	0	0	0	0	0	0	0	0	0
75	METILDOPA						0	0	0	0	0	0	0	0	0	0
75	ESCOPOLAMINA						0	0	0	0	0	0	0	0	0	0
75	LEVOMEPROMAZINA						0	0	0	0	0	0	0	0	0	0
75	NIFEDIPINO						0	0	0	0	0	0	0	0	0	0
75	CARBOCISTEINA						0	0	0	0	0	0	0	0	0	0
75	CAPTOPRIL		1				0	0	0	0	0	0	0	0	0	0
75	DIPIRONA		1				0	0	0	0	0	0	0	0	0	0
76	ESCOPOLAMINA IV						0	0	0	0	0	0	0	0	0	0
76	NIFEDIPINO RETARD						0	0	0	0	0	0	0	0	0	0
76	BETAMETASONA IM						0	0	0	0	0	0	0	0	0	0
77	DIPIRONA		1				0	0	0	0	0	0	0	0	0	0
77	HIDRALAZINA IV						0	0	0	0	0	0	0	0	0	0
77	METILDOPA						0	0	0	0	0	0	0	0	0	0
77	SIMETICONA						0	0	0	0	0	0	0	0	0	0
77	LOSARTANA		1				0	0	0	0	0	0	0	0	0	0
77	NIFEDIPINO						0	0	0	0	0	0	0	0	0	0
78	SIMETICONA						0	0	0	0	0	0	0	0	0	0
78	DIPIRONA		1				0	0	0	0	0	0	0	0	0	0
78	LEVOTIROXINA		1				0	0	0	0	0	0	0	0	0	0
78	CARVEDILOL		1				0	0	0	0	0	0	0	0	0	0
79	CAPTOPRIL		1				0	0	0	0	0	0	0	0	0	0
79	SIMETICONA		1				0	0	0	0	0	0	0	0	0	0
79	DIPIRONA						0	0	0	0	0	0	0	0	0	0
79	INSULINA REGULAR		1				0	0	0	0	0	0	0	0	0	0
80	BETAMETASONA IM						0	0	0	0	0	0	0	0	0	0
80	ESCOPOLAMINA						0	0	0	0	0	0	0	0	0	0
80	NIFEDIPINO RETARD						0	0	0	0	0	0	0	0	0	0
81	BETAMETASONA IM			1			0	0	0	0	0	0	0	0	0	0
81	ESCOPOLAMINA IV						0	0	0	0	0	0	0	0	0	0
81	SIMETICONA						0	0	0	0	0	0	0	0	0	0
81	DIPIRONA			1			0	0	0	0	0	0	0	0	0	0
82	CEFTRIAXONA IV						0	0	0	0	0	0	0	0	0	0
82	ESCOPOLAMINA						0	0	0	0	0	0	0	0	0	0
82	DIPIRONA IV						0	0	0	0	0	0	0	0	0	0
83	ESCOPOLAMINA						0	0	0	0	0	0	0	0	0	0
83	INSULINA NPH						0	0	0	0	0	0	0	0	0	0
83	INSULINA REGULAR						0	0	0	0	0	0	0	0	0	0
84	ESCOPOLAMINA						0	0	0	0	0	0	0	0	0	0
84	HIDRALAZINA IV						0	0	0	0	0	0	0	0	0	0
84	METILDOPA						0	0	0	0	0	0	0	0	0	0
84	CAPTOPRIL		1				0	0	0	0	0	0	0	0	0	0
84	SIMETICONA						0	0	0	0	0	0	0	0	0	0
84	DIPIRONA		1				0	0	0	0	0	0	0	0	0	0
84	METOCLOPRAMIDA						0	0	0	0	0	0	0	0	0	0
85	DIPIRONA			1			0	0	0	0	0	0	0	0	0	0
85	HIDRALAZINA IV						0	0	0	0	0	0	0	0	0	0
85	METILDOPA						0	0	0	0	0	0	0	0	0	0
85	BETAMETASONA IM			1			0	0	0	0	0	0	0	0	0	0
86	ENOXAPARINA IV						0	0	0	0	0	0	0	0	0	0
86	CARBAMAZEPINA						0	0	0	0	0	0	0	0	0	0
86	INSULINA REGULAR						0	0	0	0	0	0	0	0	0	0
87	CARVEDILOL		1				0	0	0	0	0	0	0	0	0	0
87	DIPIRONA		1	1			0	0	0	0	0	0	0	0	0	0
87	FUROSEMIDA			1			0	0	0	0	0	0	0	0	0	0
87	FUMARATO DE FORMOTEROL						0	0	0	0	0	0	0	0	0	0
87	BUDESONIDA			1			0	0	0	0	0	0	0	0	0	0
88	CAPTOPRIL		1				0	0	0	0	0	0	0	0	0	0
88	DIMETICONA						0	0	0	0	0	0	0	0	0	0
88	DIPIRONA		1				0	0	0	0	0	0	0	0	0	0
89	BETAMETASONA IM						0	0	0	0	0	0	0	0	0	0
89	NIFEDIPINO						0	0	0	0	0	0	0	0	0	0
89	PARACETAMOL						0	0	0	0	0	0	0	0	0	0
90	BETAMETASONA IM			1			0	0	0	0	0	0	0	0	0	0
90	ESCOPOLAMINA						0	0	0	0	0	0	0	0	0	0
90	DIPIRONA			1			0	0	0	0	0	0	0	0	0	0
90	SULFATO FERROSO						0	0	0	0	0	0	0	0	0	0
91	DIMETICONA						0	0	0	0	0	0	0	0	0	0
91	DIPIRONA						0	0	0	0	0	0	0	0	0	0
91	INSULINA REGULAR						0	0	0	0	0	0	0	0	0	0
92	DIPIRONA						0	0	0	0	0	0	0	0	0	0
92	INSULINA NPH						0	0	0	0	0	0	0	0	0	0
92	INSULINA REGULAR						0	0	0	0	0	0	0	0	0	0
92	METOCLOPRAMIDA IV						0	0	0	0	0	0	0	0	0	0
93	DIMETICONA						0	0	0	0	0	0	0	0	0	0
93	DIPIRONA		1				0	0	0	0	0	0	0	0	0	0
93	PROPRANOLOL		1				0	0	0	0	0	0	0	0	0	0
94	BETAMETASONA IM			1			0	0	0	0	0	0	0	0	0	0
94	ESCOPOLAMINA IV						0	0	0	0	0	0	0	0	0	0
94	NIFEDIPINO						0	0	0	0	0	0	0	0	0	0
94	DIPIRONA			1			0	0	0	0	0	0	0	0	0	0
95	ESCOPOLAMINA						0	0	0	0	0	0	0	0	0	0
95	METILDOPA				1	SONOLÊNCIA	0	0	0	0	0	1	0	0	0	1
95	HIDRALAZINA IV						0	0	0	0	0	0	0	0	0	0
95	NIFEDIPINO						0	0	0	0	0	0	0	0	0	0
96	CAPTOPRIL		1		1	TOSSE	0	1	0	0	0	0	0	0	0	1
96	SIMETICONA						0	0	0	0	0	0	0	0	0	0
96	DIPIRONA		1				0	0	0	0	0	0	0	0	0	0
96	OLEO MINERAL						0	0	0	0	0	0	0	0	0	0
97	OCITOCINA IV						0	0	0	0	0	0	0	0	0	0
97	DIPIRONA		1				0	0	0	0	0	0	0	0	0	0
97	DIPIRONA IV		1				0	0	0	0	0	0	0	0	0	0
97	METOCLOPRAMIDA IV			1			0	0	0	0	0	0	0	0	0	0
97	CAPTOPRIL		1				0	0	0	0	0	0	0	0	0	0
97	PROMETAZINA IV			1			0	0	0	0	0	0	0	0	0	0
97	SIMETICONA						0	0	0	0	0	0	0	0	0	0
98	CEFAZOLINA						0	0	0	0	0	0	0	0	0	0
98	ESCOPOLAMINA IV				1	VISÃO TURVA	0	0	0	0	0	0	1	0	0	1
99	DIMETICONA						0	0	0	0	0	0	0	0	0	0
99	DIPIRONA						0	0	0	0	0	0	0	0	0	0
99	INSULINA NPH		1				0	0	0	0	0	0	0	0	0	0
99	INSULINA REGULAR		1				0	0	0	0	0	0	0	0	0	0
99	METOCLOPRAMIDA						0	0	0	0	0	0	0	0	0	0
99	LEVOTIROXINA						0	0	0	0	0	0	0	0	0	0
99	METFORMINA		1				0	0	0	0	0	0	0	0	0	0
100	METILDOPA						0	0	0	0	0	0	0	0	0	0
100	DIPIRONA						0	0	0	0	0	0	0	0	0	0
100	HIDRALAZINA IV						0	0	0	0	0	0	0	0	0	0
101	CAPTOPRIL		1				0	0	0	0	0	0	0	0	0	0
101	DIMETICONA						0	0	0	0	0	0	0	0	0	0
101	DIPIRONA		1				0	0	0	0	0	0	0	0	0	0
102	INSULINA REGULAR						0	0	0	0	0	0	0	0	0	0
102	NIFEDIPINO RETARD						0	0	0	0	0	0	0	0	0	0
102	ESCOPOLAMINA IV						0	0	0	0	0	0	0	0	0	0
103	CEFAZOLINA						0	0	0	0	0	0	0	0	0	0
103	ESCOPOLAMINA IV						0	0	0	0	0	0	0	0	0	0
103	DIPIRONA IV						0	0	0	0	0	0	0	0	0	0
104	CAPTOPRIL		1				0	0	0	0	0	0	0	0	0	0
104	DIMETICONA						0	0	0	0	0	0	0	0	0	0
104	DIPIRONA		1				0	0	0	0	0	0	0	0	0	0
104	NIFEDIPINO						0	0	0	0	0	0	0	0	0	0
105	FENOBARBITAL		1	1			0	0	0	0	0	0	0	0	0	0
105	HIDRALAZINA IV						0	0	0	0	0	0	0	0	0	0
105	CARBAMAZEPINA		1				0	0	0	0	0	0	0	0	0	0
105	PARACETAMOL		1				0	0	0	0	0	0	0	0	0	0
105	DIAZEPAM			1			0	0	0	0	0	0	0	0	0	0
105	ACIDO FOLICO		1				0	0	0	0	0	0	0	0	0	0
106	DIPIRONA						0	0	0	0	0	0	0	0	0	0
106	HIDRALAZINA IV						0	0	0	0	0	0	0	0	0	0
106	INSULINA NPH						0	0	0	0	0	0	0	0	0	0
106	INSULINA REGULAR						0	0	0	0	0	0	0	0	0	0
106	METILDOPA						0	0	0	0	0	0	0	0	0	0
107	HIDRALAZINA IV						0	0	0	0	0	0	0	0	0	0
107	METILDOPA		1				0	0	0	0	0	0	0	0	0	0
107	SULFATO FERROSO		1				0	0	0	0	0	0	0	0	0	0
108	CEFTRIAXONA IV						0	0	0	0	0	0	0	0	0	0
108	ESCOPOLAMINA IV				1	TAQUICARDIA	0	0	1	0	0	0	0	0	0	1
109	ESCOPOLAMINA IV						0	0	0	0	0	0	0	0	0	0
109	INSULINA REGULAR						0	0	0	0	0	0	0	0	0	0
109	NIFEDIPINO						0	0	0	0	0	0	0	0	0	0
109	CEFAZOLINA IV						0	0	0	0	0	0	0	0	0	0
109	NISTATINA						0	0	0	0	0	0	0	0	0	0
110	NIFEDIPINO						0	0	0	0	0	0	0	0	0	0
110	ESCOPOLAMINA IV						0	0	0	0	0	0	0	0	0	0
110	QUETIAPINA			1			0	0	0	0	0	0	0	0	0	0
110	ONDASETRONA IV			1			0	0	0	0	0	0	0	0	0	0
110	HIDRALAZINA IV						0	0	0	0	0	0	0	0	0	0
110	BETAMETASONA IM						0	0	0	0	0	0	0	0	0	0
111	CAPTOPRIL		1				0	0	0	0	0	0	0	0	0	0
111	DIMETICONA						0	0	0	0	0	0	0	0	0	0
111	INSULINA REGULAR		1				0	0	0	0	0	0	0	0	0	0
111	DIPIRONA		1				0	0	0	0	0	0	0	0	0	0
112	BETAMETASONA IM						0	0	0	0	0	0	0	0	0	0
112	INSULINA NPH		1				0	0	0	0	0	0	0	0	0	0
112	INSULINA REGULAR		1				0	0	0	0	0	0	0	0	0	0
112	METILDOPA		1				0	0	0	0	0	0	0	0	0	0
112	NIFEDIPINO						0	0	0	0	0	0	0	0	0	0
112	HIDRALAZINA IV						0	0	0	0	0	0	0	0	0	0
112	PINDOLOL		1				0	0	0	0	0	0	0	0	0	0
112	LEVOMEPROMAZINA						0	0	0	0	0	0	0	0	0	0
112	METFORMINA		1				0	0	0	0	0	0	0	0	0	0
113	DIPIRONA IV						0	0	0	0	0	0	0	0	0	0
114	SILDENAFIL		1				0	0	0	0	0	0	0	0	0	0
114	FORMOTEROL						0	0	0	0	0	0	0	0	0	0
114	ENOXAPARINA IV						0	0	0	0	0	0	0	0	0	0
114	BETAMETASONA IM						0	0	0	0	0	0	0	0	0	0
114	FUROSEMIDA		1				0	0	0	0	0	0	0	0	0	0
114	RANITIDINA						0	0	0	0	0	0	0	0	0	0
115	LEVOMEPROMAZINA						0	0	0	0	0	0	0	0	0	0
115	NIFEDIPINO RETARD						0	0	0	0	0	0	0	0	0	0
115	RANITIDINA						0	0	0	0	0	0	0	0	0	0
115	ESCOPOLAMINA						0	0	0	0	0	0	0	0	0	0
115	METILDOPA						0	0	0	0	0	0	0	0	0	0
115	HIDRALAZINA IV						0	0	0	0	0	0	0	0	0	0
115	PARACETAMOL						0	0	0	0	0	0	0	0	0	0
115	METOCLOPRAMIDA IV						0	0	0	0	0	0	0	0	0	0
115	DIPIRONA						0	0	0	0	0	0	0	0	0	0
115	ESCOPOLAMINA IV						0	0	0	0	0	0	0	0	0	0
116	CAPTOPRIL						0	0	0	0	0	0	0	0	0	0
116	DIMETICONA						0	0	0	0	0	0	0	0	0	0
116	NIFEDIPINO						0	0	0	0	0	0	0	0	0	0
116	PARACETAMOL						0	0	0	0	0	0	0	0	0	0
117	NIFEDIPINO						0	0	0	0	0	0	0	0	0	0
117	DIMETICONA						0	0	0	0	0	0	0	0	0	0
117	DIPIRONA						0	0	0	0	0	0	0	0	0	0
118	CAPTOPRIL		1				0	0	0	0	0	0	0	0	0	0
118	SIMETICONA						0	0	0	0	0	0	0	0	0	0
118	DIPIRONA		1				0	0	0	0	0	0	0	0	0	0
118	METFORMINA		1				0	0	0	0	0	0	0	0	0	0
118	PARACETAMOL						0	0	0	0	0	0	0	0	0	0
119	CAPTOPRIL		1				0	0	0	0	0	0	0	0	0	0
119	SIMETICONA						0	0	0	0	0	0	0	0	0	0
119	DIPIRONA		1				0	0	0	0	0	0	0	0	0	0
119	NIFEDIPINO						0	0	0	0	0	0	0	0	0	0
120	ESCOPOLAMINA				1	TONTURA	0	0	0	0	0	1	0	0	0	1
121	CAPTOPRIL		1				0	0	0	0	0	0	0	0	0	0
121	CARVEDILOL		1				0	0	0	0	0	0	0	0	0	0
121	DIMETICONA						0	0	0	0	0	0	0	0	0	0
121	DIPIRONA		1				0	0	0	0	0	0	0	0	0	0
122	DIPIRONA			1			0	0	0	0	0	0	0	0	0	0
122	CARBAMAZEPINA		1				0	0	0	0	0	0	0	0	0	0
122	ACIDO FOLICO						0	0	0	0	0	0	0	0	0	0
122	ENOXAPARINA IV			1			0	0	0	0	0	0	0	0	0	0
122	BETAMETASONA IM		1	1			0	0	0	0	0	0	0	0	0	0
122	DIAZEPAM IV						0	0	0	0	0	0	0	0	0	0
122	CEFALEXINA						0	0	0	0	0	0	0	0	0	0
122	INSULINA REGULAR						0	0	0	0	0	0	0	0	0	0
122	OLEO MINERAL						0	0	0	0	0	0	0	0	0	0
123	METRONIDAZOL IV						0	0	0	0	0	0	0	0	0	0
123	HIDRALAZINA IV						0	0	0	0	0	0	0	0	0	0
123	METILDOPA						0	0	0	0	0	0	0	0	0	0
124	CAPTOPRIL		1				0	0	0	0	0	0	0	0	0	0
124	DIMETICONA						0	0	0	0	0	0	0	0	0	0
124	DIPIRONA		1				0	0	0	0	0	0	0	0	0	0
124	NIFEDIPINO						0	0	0	0	0	0	0	0	0	0
124	ROGAN IV						0	0	0	0	0	0	0	0	0	0
125	BETAMETASONA IM						0	0	0	0	0	0	0	0	0	0
125	METILDOPA		1		1	SONOLÊNCIA	0	0	0	0	0	1	0	0	0	1
125	SULFATO FERROSO		1				0	0	0	0	0	0	0	0	0	0
125	HIDRALAZINA IV						0	0	0	0	0	0	0	0	0	0
126	CAPTOPRIL		1				0	0	0	0	0	0	0	0	0	0
126	DIPIRONA		1				0	0	0	0	0	0	0	0	0	0
126	LEVOMEPROMAZINA						0	0	0	0	0	0	0	0	0	0
126	NIFEDIPINO						0	0	0	0	0	0	0	0	0	0
127	CAPTOPRIL		1				0	0	0	0	0	0	0	0	0	0
127	DIMETICONA						0	0	0	0	0	0	0	0	0	0
127	DIPIRONA		1				0	0	0	0	0	0	0	0	0	0
127	NIFEDIPINO						0	0	0	0	0	0	0	0	0	0
128	ESCOPOLAMINA						0	0	0	0	0	0	0	0	0	0
128	DIPIRONA		1				0	0	0	0	0	0	0	0	0	0
128	HIDRALAZINA IV		1				0	0	0	0	0	0	0	0	0	0
128	LEVOMEPROMAZINA						0	0	0	0	0	0	0	0	0	0
128	NIFEDIPINO RETARD						0	0	0	0	0	0	0	0	0	0
128	PROPRANOLOL		1				0	0	0	0	0	0	0	0	0	0
128	CAPTOPRIL		1				0	0	0	0	0	0	0	0	0	0
128	DIMETICONA						0	0	0	0	0	0	0	0	0	0
129	NISTATINA						0	0	0	0	0	0	0	0	0	0
129	HIDRALAZINA IV						0	0	0	0	0	0	0	0	0	0
129	METILDOPA						0	0	0	0	0	0	0	0	0	0
129	CAPTOPRIL		1				0	0	0	0	0	0	0	0	0	0
129	DIMETICONA						0	0	0	0	0	0	0	0	0	0
129	DIPIRONA		1				0	0	0	0	0	0	0	0	0	0
129	NIFEDIPINO						0	0	0	0	0	0	0	0	0	0
130	HIDROCORTISONA						0	0	0	0	0	0	0	0	0	0
130	FENOTEROL						0	0	0	0	0	0	0	0	0	0
131	CAPTOPRIL		1				0	0	0	0	0	0	0	0	0	0
131	SIMETICONA						0	0	0	0	0	0	0	0	0	0
131	DIPIRONA		1				0	0	0	0	0	0	0	0	0	0
132	NISTATINA						0	0	0	0	0	0	0	0	0	0
132	ACIDO FOLICO		1				0	0	0	0	0	0	0	0	0	0
132	FENOBARBITAL	1	1				0	0	0	0	0	0	0	0	0	0
132	HIDRALAZINA IV						0	0	0	0	0	0	0	0	0	0
132	CARBAMAZEPINA		1	1			0	0	0	0	0	0	0	0	0	0
132	FENITOINA	1	1	1			0	0	0	0	0	0	0	0	0	0
132	PARACETAMOL		1				0	0	0	0	0	0	0	0	0	0
132	ONDASETRONA IV						0	0	0	0	0	0	0	0	0	0
133	CAPTOPRIL		1				0	0	0	0	0	0	0	0	0	0
133	SIMETICONA						0	0	0	0	0	0	0	0	0	0
133	DIPIRONA		1				0	0	0	0	0	0	0	0	0	0
133	OLEO MINERAL						0	0	0	0	0	0	0	0	0	0
133	SULFATO FERROSO						0	0	0	0	0	0	0	0	0	0
134	DIPIRONA IV		1				0	0	0	0	0	0	0	0	0	0
134	HIDRALAZINA IV	1	1				0	0	0	0	0	0	0	0	0	0
134	METILDOPA		1				0	0	0	0	0	0	0	0	0	0
134	NIFEDIPINO						0	0	0	0	0	0	0	0	0	0
134	ONDASETRONA IV						0	0	0	0	0	0	0	0	0	0
134	LEVOMEPROMAZINA						0	0	0	0	0	0	0	0	0	0
134	CAPTOPRIL		1	1			0	0	0	0	0	0	0	0	0	0
134	PROPRANOLOL		1				0	0	0	0	0	0	0	0	0	0
134	FUROSEMIDA	1	1	1			0	0	0	0	0	0	0	0	0	0
134	OLEO MINERAL						0	0	0	0	0	0	0	0	0	0
134	DIAZEPAM						0	0	0	0	0	0	0	0	0	0
134	LOSARTANA		1	1			0	0	0	0	0	0	0	0	0	0
135	CAPTOPRIL		1				0	0	0	0	0	0	0	0	0	0
135	SIMETICONA						0	0	0	0	0	0	0	0	0	0
135	DIPIRONA		1				0	0	0	0	0	0	0	0	0	0
135	NIFEDIPINO						0	0	0	0	0	0	0	0	0	0
136	NIFEDIPINO RETARD						0	0	0	0	0	0	0	0	0	0
136	PINDOLOL		1				0	0	0	0	0	0	0	0	0	0
136	OCITOCINA IV						0	0	0	0	0	0	0	0	0	0
136	DIPIRONA		1				0	0	0	0	0	0	0	0	0	0
136	DIMETICONA						0	0	0	0	0	0	0	0	0	0
137	CAPTOPRIL		1				0	0	0	0	0	0	0	0	0	0
137	DIPIRONA		1				0	0	0	0	0	0	0	0	0	0
137	SIMETICONA						0	0	0	0	0	0	0	0	0	0
138	CEFTRIAXONA						0	0	0	0	0	0	0	0	0	0
138	NISTATINA						0	0	0	0	0	0	0	0	0	0
138	ESCOPOLAMINA IV						0	0	0	0	0	0	0	0	0	0
138	FENOBARBITAL						0	0	0	0	0	0	0	0	0	0
138	NIFEDIPINO						0	0	0	0	0	0	0	0	0	0
138	ONDASETRONA IV		1				0	0	0	0	0	0	0	0	0	0
138	TRAMADOL IV		1		1	SONOLÊNCIA	0	0	0	0	0	1	0	0	0	1
138	OLEO MINERAL						0	0	0	0	0	0	0	0	0	0
138	SULFATO FERROSO						0	0	0	0	0	0	0	0	0	0
138	ACIDO FOLICO						0	0	0	0	0	0	0	0	0	0
139	CAPTOPRIL		1				0	0	0	0	0	0	0	0	0	0
139	CETOPROFENO		1				0	0	0	0	0	0	0	0	0	0
139	HIDROCLOROTIAZIDA		1				0	0	0	0	0	0	0	0	0	0
139	NIFEDIPINO						0	0	0	0	0	0	0	0	0	0
139	METILDOPA						0	0	0	0	0	0	0	0	0	0
139	LEVOMEPROMAZINA				1	EDEMA FACIAL	0	0	0	0	0	0	0	1	0	1
139	METOCLOPRAMIDA IV						0	0	0	0	0	0	0	0	0	0
139	NIFEDIPINO						0	0	0	0	0	0	0	0	0	0
140	HIDRALAZINA IV						0	0	0	0	0	0	0	0	0	0
140	INSULINA NPH		1				0	0	0	0	0	0	0	0	0	0
140	INSULINA REGULAR		1				0	0	0	0	0	0	0	0	0	0
140	METILDOPA						0	0	0	0	0	0	0	0	0	0
140	CAPTOPRIL		1				0	0	0	0	0	0	0	0	0	0
140	SIMETICONA						0	0	0	0	0	0	0	0	0	0
140	DIPIRONA		1				0	0	0	0	0	0	0	0	0	0
140	OLEO MINERAL						0	0	0	0	0	0	0	0	0	0
140	CEFTRIAXONA IV				1	DIARRÉIA	0	0	0	0	1	0	0	0	0	1
140	METFORMINA		1				0	0	0	0	0	0	0	0	0	0
141	HIDRALAZINA						0	0	0	0	0	0	0	0	0	0
141	METILDOPA				1	SONOLENCIA	0	0	0	0	0	1	0	0	0	1
141	DIPIRONA						0	0	0	0	0	0	0	0	0	0
142	CEFTRIAXONA IV						0	0	0	0	0	0	0	0	0	0
142	METRONIDAZOL						0	0	0	0	0	0	0	0	0	0
142	ESCOPOLAMINA						0	0	0	0	0	0	0	0	0	0
142	DIPIRONA						0	0	0	0	0	0	0	0	0	0
142	SULFATO FERROSO						0	0	0	0	0	0	0	0	0	0
142	FENOTEROL				1	TAQUICARDIA TREMORES	0	0	1	0	0	0	0	0	0	1
142	IPRATROPIO						0	0	0	0	0	0	0	0	0	0
143	ESCOPOLAMINA				1	SONOLENCIA VISAO TURVA	0	0	0	0	0	1	1	0	0	2
144	CEFTRIAXONA IV				1	VOMITOS	0	0	0	0	1	0	0	0	0	1
144	ACIDO FOLICO						0	0	0	0	0	0	0	0	0	0
144	DIPIRONA IV						0	0	0	0	0	0	0	0	0	0
145	CAPTROPIL				1	AUMENTO DA UREIA DE CREATININA	0	0	0	1	0	0	0	0	0	1
145	DIPIRONA						0	0	0	0	0	0	0	0	0	0
145	NIFEDIPINO						0	0	0	0	0	0	0	0	0	0
146	DIPIRONA						0	0	0	0	0	0	0	0	0	0
147	HIDRALAZINA	1	1				0	0	0	0	0	0	0	0	0	0
147	METILDOPA		1				0	0	0	0	0	0	0	0	0	0
147	NIFEDIPINO						0	0	0	0	0	0	0	0	0	0
147	CAPTOPRIL		1	1			0	0	0	0	0	0	0	0	0	0
147	SIMETICONA						0	0	0	0	0	0	0	0	0	0
147	DIPIRONA		1				0	0	0	0	0	0	0	0	0	0
147	LEVOMEPROMAZINA						0	0	0	0	0	0	0	0	0	0
147	PROPRANOLOL		1				0	0	0	0	0	0	0	0	0	0
147	FUROSEMIDA IV	1	1				0	0	0	0	0	0	0	0	0	0
147	SULFATO FERROSO						0	0	0	0	0	0	0	0	0	0
147	LOSARTANA		1	1			0	0	0	0	0	0	0	0	0	0
148	INSULINA REGULAR						0	0	0	0	0	0	0	0	0	0
148	GLICOSE						0	0	0	0	0	0	0	0	0	0
148	HIDRALAZINA						0	0	0	0	0	0	0	0	0	0
149	CEFTRIAXONA IV						0	0	0	0	0	0	0	0	0	0
149	DIPIRONA IV						0	0	0	0	0	0	0	0	0	0
149	ESCOPOLAMINA IV						0	0	0	0	0	0	0	0	0	0
149	SULFATO FERROSO						0	0	0	0	0	0	0	0	0	0
149	RANITIDINA IV						0	0	0	0	0	0	0	0	0	0
150	CEFALEXINA						0	0	0	0	0	0	0	0	0	0
150	ESCOPOLAMINA						0	0	0	0	0	0	0	0	0	0
150	OLEO MINERAL						0	0	0	0	0	0	0	0	0	0
151	ESCOPOLAMINA						0	0	0	0	0	0	0	0	0	0
151	DIPIRONA						0	0	0	0	0	0	0	0	0	0
151	METILDOPA						0	0	0	0	0	0	0	0	0	0
151	GLICOSE						0	0	0	0	0	0	0	0	0	0
151	NIFEDIPINO		1				0	0	0	0	0	0	0	0	0	0
151	SULFATO DE MAGNESIO		1				0	0	0	0	0	0	0	0	0	0
151	HIDRALAZINA						0	0	0	0	0	0	0	0	0	0
152	CEFAZOLINA						0	0	0	0	0	0	0	0	0	0
152	DIPIRONA						0	0	0	0	0	0	0	0	0	0
153	CAPTOPRIL		1				0	0	0	0	0	0	0	0	0	0
153	SIMETICONA						0	0	0	0	0	0	0	0	0	0
153	DIPIRONA		1				0	0	0	0	0	0	0	0	0	0
153	NIFEDIPINO						0	0	0	0	0	0	0	0	0	0
154	CEFTRIAXONA IV						0	0	0	0	0	0	0	0	0	0
154	DIPIRONA IV				1	VISAO TURVA	0	0	0	0	0	0	0	1	0	1
154	SIMETICONA						0	0	0	0	0	0	0	0	0	0
155	CEFALEXINA				1	NAUSEAS VOMITO	0	0	0	0	1	0	0	0	0	1
155	ESCOPOLAMINA IV						0	0	0	0	0	0	0	0	0	0
155	NIFEDIPINO						0	0	0	0	0	0	0	0	0	0
156	DIPIRONA						0	0	0	0	0	0	0	0	0	0
157	CEFAZOLINA IV						0	0	0	0	0	0	0	0	0	0
157	ESCOPOLAMINA IV						0	0	0	0	0	0	0	0	0	0
157	BETAMETASONA IM						0	0	0	0	0	0	0	0	0	0
158	CAPTOPRIL		1				0	0	0	0	0	0	0	0	0	0
158	SIMETICONA						0	0	0	0	0	0	0	0	0	0
158	DIPIRONA		1				0	0	0	0	0	0	0	0	0	0
158	NIFEDIPINO						0	0	0	0	0	0	0	0	0	0
159	ACIDO FOLICO						0	0	0	0	0	0	0	0	0	0
159	ESCOPOLAMINA IV						0	0	0	0	0	0	0	0	0	0
159	INSULINA NPH				1	HIPOGLICEMIA	1	0	0	0	0	0	0	0	0	1
159	INSULINA REGULAR						0	0	0	0	0	0	0	0	0	0
159	PREDNISONA						0	0	0	0	0	0	0	0	0	0
159	SULFATO FERROSO		1				0	0	0	0	0	0	0	0	0	0
159	HIDROXICLOROQUINA						0	0	0	0	0	0	0	0	0	0
159	HIDRALAZINA						0	0	0	0	0	0	0	0	0	0
159	LEVOMEPROMAZINA						0	0	0	0	0	0	0	0	0	0
159	METILDOPA		1				0	0	0	0	0	0	0	0	0	0
160	DIPIRONA						0	0	0	0	0	0	0	0	0	0
160	BISACODIL						0	0	0	0	0	0	0	0	0	0
161	BETAMETASONA IM			1			0	0	0	0	0	0	0	0	0	0
161	ESCOPOLAMINA						0	0	0	0	0	0	0	0	0	0
161	DIPIRONA			1			0	0	0	0	0	0	0	0	0	0
161	NIFEDIPINO						0	0	0	0	0	0	0	0	0	0
162	BETAMETASONA IM						0	0	0	0	0	0	0	0	0	0
162	NIFEDIPINO						0	0	0	0	0	0	0	0	0	0
162	ESCOPOLAMINA IV						0	0	0	0	0	0	0	0	0	0
163	NIFEDIPINO						0	0	0	0	0	0	0	0	0	0
163	BETAMETASONA IM			1			0	0	0	0	0	0	0	0	0	0
163	ESCOPOLAMINA						0	0	0	0	0	0	0	0	0	0
163	DIPIRONA			1			0	0	0	0	0	0	0	0	0	0
164	CARVEDILOL						0	0	0	0	0	0	0	0	0	0
164	SIMETICONA						0	0	0	0	0	0	0	0	0	0
164	DIPIRONA						0	0	0	0	0	0	0	0	0	0
165	CAPTOPRIL		1				0	0	0	0	0	0	0	0	0	0
165	DIPIRONA		1				0	0	0	0	0	0	0	0	0	0
165	SIMETICONA						0	0	0	0	0	0	0	0	0	0
165	INSULINA REGULAR		1				0	0	0	0	0	0	0	0	0	0
165	NIFEDIPINO						0	0	0	0	0	0	0	0	0	0
165	GLICOSE						0	0	0	0	0	0	0	0	0	0
166	BETAMETASONA IM						0	0	0	0	0	0	0	0	0	0
166	SULFATO FERROSO						0	0	0	0	0	0	0	0	0	0
167	DIPIRONA			1			0	0	0	0	0	0	0	0	0	0
167	BETAMETASONA IM			1			0	0	0	0	0	0	0	0	0	0
167	ESCOPOLAMINA IV						0	0	0	0	0	0	0	0	0	0
167	ESCOPOLAMINA						0	0	0	0	0	0	0	0	0	0
168	NISTATINA IV						0	0	0	0	0	0	0	0	0	0
168	DIPIRONA						0	0	0	0	0	0	0	0	0	0
168	ESCOPOLAMINA						0	0	0	0	0	0	0	0	0	0
169	BETAMETASONA IM			1			0	0	0	0	0	0	0	0	0	0
169	DIPIRONA			1			0	0	0	0	0	0	0	0	0	0
169	ESCOPOLAMINA IV						0	0	0	0	0	0	0	0	0	0
169	LEVOMEPROMAZINA						0	0	0	0	0	0	0	0	0	0
169	METILDOPA						0	0	0	0	0	0	0	0	0	0
169	HIDRALAZINA						0	0	0	0	0	0	0	0	0	0
170	CAPTOPRIL		1				0	0	0	0	0	0	0	0	0	0
170	CETOPROFENO		1				0	0	0	0	0	0	0	0	0	0
170	NIFEDIPINO						0	0	0	0	0	0	0	0	0	0
170	LEVOMEPROMAZINA						0	0	0	0	0	0	0	0	0	0
171	CAPTOPRIL						0	0	0	0	0	0	0	0	0	0
171	SIMETICONA						0	0	0	0	0	0	0	0	0	0
171	PARACETAMOL						0	0	0	0	0	0	0	0	0	0
171	CEFAZOLINA						0	0	0	0	0	0	0	0	0	0
171	CLINDAMICINA						0	0	0	0	0	0	0	0	0	0
171	GENTAMICINA						0	0	0	0	0	0	0	0	0	0
172	CEFAZOLINA IV						0	0	0	0	0	0	0	0	0	0
172	BETAMETASONA IM			1			0	0	0	0	0	0	0	0	0	0
172	ESCOPOLAMINA IV						0	0	0	0	0	0	0	0	0	0
172	ESCOPOLAMINA						0	0	0	0	0	0	0	0	0	0
172	DIPIRONA			1			0	0	0	0	0	0	0	0	0	0
172	NIFEDIPINO						0	0	0	0	0	0	0	0	0	0
172	CEFALEXINA						0	0	0	0	0	0	0	0	0	0
172	NISTATINA IV						0	0	0	0	0	0	0	0	0	0
173	NISTATINA IV						0	0	0	0	0	0	0	0	0	0
173	ESCOPOLAMINA						0	0	0	0	0	0	0	0	0	0
173	DIPIRONA						0	0	0	0	0	0	0	0	0	0
174	ESCOPOLAMINA						0	0	0	0	0	0	0	0	0	0
174	DIPIRONA						0	0	0	0	0	0	0	0	0	0
174	SULFATO FERROSO						0	0	0	0	0	0	0	0	0	0
174	NIFEDIPINO						0	0	0	0	0	0	0	0	0	0
174	OLEO MINERAL						0	0	0	0	0	0	0	0	0	0
175	ACIDO FOLICO						0	0	0	0	0	0	0	0	0	0
175	ESCOPOLAMINA						0	0	0	0	0	0	0	0	0	0
175	DIPIRONA						0	0	0	0	0	0	0	0	0	0
175	HIDRALAZINA						0	0	0	0	0	0	0	0	0	0
175	ALBENDAZOL						0	0	0	0	0	0	0	0	0	0
175	METILDOPA		1				0	0	0	0	0	0	0	0	0	0
175	SULFATO FERROSO		1				0	0	0	0	0	0	0	0	0	0
175	CEFALEXINA						0	0	0	0	0	0	0	0	0	0
175	NIFEDIPINO						0	0	0	0	0	0	0	0	0	0
175	TETMOSOL						0	0	0	0	0	0	0	0	0	0
176	HIDRALAZINA						0	0	0	0	0	0	0	0	0	0
176	METILDOPA						0	0	0	0	0	0	0	0	0	0
177	CEFAZOLINA IV						0	0	0	0	0	0	0	0	0	0
177	BETAMETASONA IM						0	0	0	0	0	0	0	0	0	0
177	NIFEDIPINO						0	0	0	0	0	0	0	0	0	0
177	PARACETAMOL						0	0	0	0	0	0	0	0	0	0
177	CEFALEXINA						0	0	0	0	0	0	0	0	0	0
178	LOSARTANA		1	1			0	0	0	0	0	0	0	0	0	0
178	INSULINA REGULAR		1				0	0	0	0	0	0	0	0	0	0
178	NIFEDIPINO						0	0	0	0	0	0	0	0	0	0
178	CAPTOPRIL		1	1			0	0	0	0	0	0	0	0	0	0
179	ESCOPOLAMINA						0	0	0	0	0	0	0	0	0	0
179	DIPIRONA						0	0	0	0	0	0	0	0	0	0
179	HIDRALAZINA						0	0	0	0	0	0	0	0	0	0
179	ESCOPOLAMINA IV						0	0	0	0	0	0	0	0	0	0
179	CEFAZOLINA IV						0	0	0	0	0	0	0	0	0	0
180	CEFTRIAXONA IV						0	0	0	0	0	0	0	0	0	0
180	DIPIRONA						0	0	0	0	0	0	0	0	0	0
181	HIDRALAZINA						0	0	0	0	0	0	0	0	0	0
181	INSULINA NPH						0	0	0	0	0	0	0	0	0	0
181	INSULINA REGULAR						0	0	0	0	0	0	0	0	0	0
181	METILDOPA						0	0	0	0	0	0	0	0	0	0
181	FENOTEROL						0	0	0	0	0	0	0	0	0	0
181	IPRATROPIO						0	0	0	0	0	0	0	0	0	0
181	RANITIDINA						0	0	0	0	0	0	0	0	0	0
181	GLICOSE						0	0	0	0	0	0	0	0	0	0
182	CARVEDILOL						0	0	0	0	0	0	0	0	0	0
182	ESCOPOLAMINA						0	0	0	0	0	0	0	0	0	0
182	DIPIRONA						0	0	0	0	0	0	0	0	0	0
183	ENOXAPARINA			1			0	0	0	0	0	0	0	0	0	0
183	FENOBARBITAL	1	1				0	0	0	0	0	0	0	0	0	0
183	LEVOMEPROMAZINA	1	1				0	0	0	0	0	0	0	0	0	0
183	BROMOPRIDA						0	0	0	0	0	0	0	0	0	0
183	FENITOINA	1	1	1			0	0	0	0	0	0	0	0	0	0
183	CARBAMAZEPINA		1	1			0	0	0	0	0	0	0	0	0	0
183	DIPIRONA			1			0	0	0	0	0	0	0	0	0	0
183	ACIDO FOLICO		1				0	0	0	0	0	0	0	0	0	0
183	SULFATO FERROSO						0	0	0	0	0	0	0	0	0	0
184	SIMETICONA						0	0	0	0	0	0	0	0	0	0
184	DIPIRONA			1			0	0	0	0	0	0	0	0	0	0
184	FLUOXETINA			1			0	0	0	0	0	0	0	0	0	0
184	AMIODARONA			1			0	0	0	0	0	0	0	0	0	0
185	CAPTOPRIL						0	0	0	0	0	0	0	0	0	0
185	NIFEDIPINO						0	0	0	0	0	0	0	0	0	0
185	TRAMADOL IV						0	0	0	0	0	0	0	0	0	0
186	DIPIRONA						0	0	0	0	0	0	0	0	0	0
186	FENITOINA IV				1	TONTURA	0	0	0	0	0	1	0	0	0	1
186	HIDRALAZINA IV						0	0	0	0	0	0	0	0	0	0
186	METOCLOPRAMIDA IV						0	0	0	0	0	0	0	0	0	0
186	SULFATO FERROSO						0	0	0	0	0	0	0	0	0	0
186	ACIDO FOLICO		1				0	0	0	0	0	0	0	0	0	0
186	FENOTEROL						0	0	0	0	0	0	0	0	0	0
186	IPRATROPIO						0	0	0	0	0	0	0	0	0	0
186	FENITOINA		1	1			0	0	0	0	0	0	0	0	0	0
186	CARBAMAZEPINA			1			0	0	0	0	0	0	0	0	0	0
187	OCITOCINA						0	0	0	0	0	0	0	0	0	0
187	TRAMADOL IV		1				0	0	0	0	0	0	0	0	0	0
187	ONDANSETRONA IV		1				0	0	0	0	0	0	0	0	0	0
187	CEFTRIAXONA						0	0	0	0	0	0	0	0	0	0
187	GENTAMICINA						0	0	0	0	0	0	0	0	0	0
187	TENOXICAM IV						0	0	0	0	0	0	0	0	0	0
188	CAPTOPRIL		1				0	0	0	0	0	0	0	0	0	0
188	DIPIRONA IV		1				0	0	0	0	0	0	0	0	0	0
188	SULFATO FERROSO						0	0	0	0	0	0	0	0	0	0
188	NIFEDIPINO						0	0	0	0	0	0	0	0	0	0
189	DIPIRONA		1	1			0	0	0	0	0	0	0	0	0	0
189	FUROSEMIDA IV		1	1			0	0	0	0	0	0	0	0	0	0
189	HIDROCLOROTIAZIDA		1	1			0	0	0	0	0	0	0	0	0	0
189	LEVOMEPROMAZINA						0	0	0	0	0	0	0	0	0	0
189	LOSARTANA		1				0	0	0	0	0	0	0	0	0	0
189	NIFEDIPINO						0	0	0	0	0	0	0	0	0	0
189	PROPRANOLOL		1				0	0	0	0	0	0	0	0	0	0
190	HIDRALAZINA IV						0	0	0	0	0	0	0	0	0	0
190	METILDOPA						0	0	0	0	0	0	0	0	0	0
190	DIPIRONA						0	0	0	0	0	0	0	0	0	0
191	DIPIRONA IV						0	0	0	0	0	0	0	0	0	0
191	GLICOSE						0	0	0	0	0	0	0	0	0	0
191	INSULINA REGULAR						0	0	0	0	0	0	0	0	0	0
191	INSULINA NPH						0	0	0	0	0	0	0	0	0	0
192	BETAMETASONA IM						0	0	0	0	0	0	0	0	0	0
192	ESCOPOLAMINA IV						0	0	0	0	0	0	0	0	0	0
192	ESCOPOLAMINA						0	0	0	0	0	0	0	0	0	0
193	CAPTOPRIL		1				0	0	0	0	0	0	0	0	0	0
193	SIMETICONA						0	0	0	0	0	0	0	0	0	0
193	DIPIRONA						0	0	0	0	0	0	0	0	0	0
193	INSULINA REGULAR		1				0	0	0	0	0	0	0	0	0	0
194	BETAMETASONA IM						0	0	0	0	0	0	0	0	0	0
194	ESCOPOLAMINA						0	0	0	0	0	0	0	0	0	0
194	INSULINA NPH		1		1	HIPOGLICEMIA	1	0	0	0	0	0	0	0	0	1
194	INSULINA REGULAR		1				0	0	0	0	0	0	0	0	0	0
194	NIFEDIPINO						0	0	0	0	0	0	0	0	0	0
194	HIDRALAZINA IV						0	0	0	0	0	0	0	0	0	0
194	METILDOPA						0	0	0	0	0	0	0	0	0	0
194	GLICOSE						0	0	0	0	0	0	0	0	0	0
194	CAPTOPRIL		1				0	0	0	0	0	0	0	0	0	0
194	SIMETICONA						0	0	0	0	0	0	0	0	0	0
194	DIPIRONA		1				0	0	0	0	0	0	0	0	0	0
195	ENOXAPARINA			1			0	0	0	0	0	0	0	0	0	0
195	ESCOPOLAMINA						0	0	0	0	0	0	0	0	0	0
195	VARFARINA			1			0	0	0	0	0	0	0	0	0	0
196	ESCOPOLAMINA						0	0	0	0	0	0	0	0	0	0
196	ESCOPOLAMINA IV				1	VISAO TURVA TONTURA	0	0	0	0	0	1	1	0	0	2
196	NIFEDIPINO						0	0	0	0	0	0	0	0	0	0
196	DIPIRONA						0	0	0	0	0	0	0	0	0	0
197	ESCOPOLAMINA						0	0	0	0	0	0	0	0	0	0
197	DIPIRONA			1			0	0	0	0	0	0	0	0	0	0
197	BETAMETASONA IM			1			0	0	0	0	0	0	0	0	0	0
197	RANITIDINA						0	0	0	0	0	0	0	0	0	0
197	RANITIDINA IV						0	0	0	0	0	0	0	0	0	0
197	ONDANSETRONA IV						0	0	0	0	0	0	0	0	0	0
198	SIMETICONA						0	0	0	0	0	0	0	0	0	0
198	DIPIRONA		1				0	0	0	0	0	0	0	0	0	0
198	CAPTOPRIL		1				0	0	0	0	0	0	0	0	0	0
199	SIMETICONA						0	0	0	0	0	0	0	0	0	0
199	DIPIRONA		1				0	0	0	0	0	0	0	0	0	0
199	CAPTOPRIL		1				0	0	0	0	0	0	0	0	0	0
200	GLICOSE						0	0	0	0	0	0	0	0	0	0
200	HIDRALAZINA IV						0	0	0	0	0	0	0	0	0	0
200	METILDOPA						0	0	0	0	0	0	0	0	0	0
200	NIFEDIPINO		1				0	0	0	0	0	0	0	0	0	0
200	SULFATO DE MAGNESIO		1				0	0	0	0	0	0	0	0	0	0
201	ESCOPOLAMINA						0	0	0	0	0	0	0	0	0	0
201	DIPIRONA						0	0	0	0	0	0	0	0	0	0
202	CLINDAMICINA IV						0	0	0	0	0	0	0	0	0	0
202	GENTAMICINA IV	1					0	0	0	0	0	0	0	0	0	0
202	CAPTOPRIL		1				0	0	0	0	0	0	0	0	0	0
202	CETOPROFENO		1	1			0	0	0	0	0	0	0	0	0	0
202	SIMETICONA						0	0	0	0	0	0	0	0	0	0
202	DIPIRONA IV			1			0	0	0	0	0	0	0	0	0	0
202	LEVOMEPROMAZINA						0	0	0	0	0	0	0	0	0	0
202	OLEO MINERAL						0	0	0	0	0	0	0	0	0	0
202	PENICILINA G	1					0	0	0	0	0	0	0	0	0	0
203	CEFAZOLINA IV						0	0	0	0	0	0	0	0	0	0
203	ESCOPOLAMINA						0	0	0	0	0	0	0	0	0	0
203	DIPIRONA						0	0	0	0	0	0	0	0	0	0
203	HIDRALAZINA IV						0	0	0	0	0	0	0	0	0	0
203	METILDOPA						0	0	0	0	0	0	0	0	0	0
203	NIFEDIPINO						0	0	0	0	0	0	0	0	0	0
204	CEFAZOLINA IV						0	0	0	0	0	0	0	0	0	0
204	DIPIRONA						0	0	0	0	0	0	0	0	0	0
204	ESCOPOLAMINA						0	0	0	0	0	0	0	0	0	0
205	BETAMETASONA IV			1			0	0	0	0	0	0	0	0	0	0
205	DIPIRONA IV			1			0	0	0	0	0	0	0	0	0	0
205	ESCOPOLAMINA IV						0	0	0	0	0	0	0	0	0	0
205	METOCLOPRAMIDA IV						0	0	0	0	0	0	0	0	0	0
205	NIFEDIPINO						0	0	0	0	0	0	0	0	0	0
206	CAPTOPRIL		1				0	0	0	0	0	0	0	0	0	0
206	SIMETICONA						0	0	0	0	0	0	0	0	0	0
206	DIPIRONA		1				0	0	0	0	0	0	0	0	0	0
207	CEFAZOLINA IV						0	0	0	0	0	0	0	0	0	0
207	DIPIRONA IV						0	0	0	0	0	0	0	0	0	0
207	OLEO MINERAL						0	0	0	0	0	0	0	0	0	0
207	VITAMINA C						0	0	0	0	0	0	0	0	0	0
208	LOSARTANA						0	0	0	0	0	0	0	0	0	0
208	NIFEDIPINO						0	0	0	0	0	0	0	0	0	0
208	PROPRANOLOL						0	0	0	0	0	0	0	0	0	0
209	BETAMETASONA IM			1			0	0	0	0	0	0	0	0	0	0
209	NIFIDIPINO						0	0	0	0	0	0	0	0	0	0
209	ESCOPOLAMINA						0	0	0	0	0	0	0	0	0	0
209	DIPIRONA			1			0	0	0	0	0	0	0	0	0	0
210	HIDRALAZINA IV						0	0	0	0	0	0	0	0	0	0
210	METILDOPA						0	0	0	0	0	0	0	0	0	0
210	CEFALEXINA						0	0	0	0	0	0	0	0	0	0
211	CAPTOPRIL						0	0	0	0	0	0	0	0	0	0
211	LEVOMEPROMAZINA						0	0	0	0	0	0	0	0	0	0
211	CABERGOLINA						0	0	0	0	0	0	0	0	0	0
212	BETAMETASONA IM						0	0	0	0	0	0	0	0	0	0
212	ESCOPOLAMINA						0	0	0	0	0	0	0	0	0	0
212	NIFEDIPINO						0	0	0	0	0	0	0	0	0	0
213	BETAMETASONA IM			1			0	0	0	0	0	0	0	0	0	0
213	ESCOPOLAMINA						0	0	0	0	0	0	0	0	0	0
213	DIPIRONA			1			0	0	0	0	0	0	0	0	0	0
213	NIFEDIPINO						0	0	0	0	0	0	0	0	0	0
213	INSULINA NPH		1				0	0	0	0	0	0	0	0	0	0
213	INSULINA REGULAR		1				0	0	0	0	0	0	0	0	0	0
213	METOCLOPRAMIDA IV						0	0	0	0	0	0	0	0	0	0
214	PARACETAMOL						0	0	0	0	0	0	0	0	0	0
214	METOCLOPRAMIDA IV						0	0	0	0	0	0	0	0	0	0
215	ESCOPOLAMINA IV						0	0	0	0	0	0	0	0	0	0
216	HIDRALAZINA IV						0	0	0	0	0	0	0	0	0	0
216	METILDOPA						0	0	0	0	0	0	0	0	0	0
217	ESCOPOLAMINA						0	0	0	0	0	0	0	0	0	0
217	DIPIRONA						0	0	0	0	0	0	0	0	0	0
217	CARBOCISTEINA						0	0	0	0	0	0	0	0	0	0
217	INSULINA REGULAR		1				0	0	0	0	0	0	0	0	0	0
217	INSULINA NPH		1				0	0	0	0	0	0	0	0	0	0
218	CAPTOPRIL		1				0	0	0	0	0	0	0	0	0	0
218	SIMETICONA						0	0	0	0	0	0	0	0	0	0
218	DIPIRONA		1				0	0	0	0	0	0	0	0	0	0
218	NIFEDIPINO						0	0	0	0	0	0	0	0	0	0
218	SULFATO FERROSO						0	0	0	0	0	0	0	0	0	0
218	FENOTEROL						0	0	0	0	0	0	0	0	0	0
218	IPRATROPIO						0	0	0	0	0	0	0	0	0	0
219	HIDRALAZINA IV						0	0	0	0	0	0	0	0	0	0
219	METILDOPA		1				0	0	0	0	0	0	0	0	0	0
219	CAPTOPRIL		1				0	0	0	0	0	0	0	0	0	0
219	SIMETICONA						0	0	0	0	0	0	0	0	0	0
219	DIPIRONA		1				0	0	0	0	0	0	0	0	0	0
219	NIFEDIPINO						0	0	0	0	0	0	0	0	0	0
219	SULFATO FERROSO		1				0	0	0	0	0	0	0	0	0	0
220	HIDRALAZINA IV						0	0	0	0	0	0	0	0	0	0
220	METILDOPA						0	0	0	0	0	0	0	0	0	0
221	HIDRALAZINA IV						0	0	0	0	0	0	0	0	0	0
221	METILDOPA		1				0	0	0	0	0	0	0	0	0	0
221	SULFATO FERROSO		1				0	0	0	0	0	0	0	0	0	0
222	CARVEDILOL		1				0	0	0	0	0	0	0	0	0	0
222	PENICILINA BENZATINA						0	0	0	0	0	0	0	0	0	0
222	METRONIDAZOL						0	0	0	0	0	0	0	0	0	0
222	BETAMETAZONA COMPOSTA			1			0	0	0	0	0	0	0	0	0	0
222	ESCOPOLAMINA						0	0	0	0	0	0	0	0	0	0
222	DIPIRONA		1	1			0	0	0	0	0	0	0	0	0	0
223	CAPTOPRIL		1				0	0	0	0	0	0	0	0	0	0
223	DIPIRONA		1				0	0	0	0	0	0	0	0	0	0
223	NIFEDIPINO						0	0	0	0	0	0	0	0	0	0
224	CAPTOPRIL		1				0	0	0	0	0	0	0	0	0	0
224	DIPIRONA		1				0	0	0	0	0	0	0	0	0	0
224	METOCLOPRAMIDA IV						0	0	0	0	0	0	0	0	0	0
224	NIFEDIPINO						0	0	0	0	0	0	0	0	0	0
224	RANITIDINA						0	0	0	0	0	0	0	0	0	0
225	CEFTRIAXONA IV						0	0	0	0	0	0	0	0	0	0
225	METRONIDAZOL IV						0	0	0	0	0	0	0	0	0	0
225	SIMETICONA						0	0	0	0	0	0	0	0	0	0
225	DIPIRONA IV						0	0	0	0	0	0	0	0	0	0
225	METOCLOPRAMIDA IV			1			0	0	0	0	0	0	0	0	0	0
225	RANITIDINA IV						0	0	0	0	0	0	0	0	0	0
225	TRAMADOL IV			1			0	0	0	0	0	0	0	0	0	0
226	BETAMETASONA IM			1			0	0	0	0	0	0	0	0	0	0
226	DIPIRONA IV			1			0	0	0	0	0	0	0	0	0	0
226	NIFEDIPINO			1			0	0	0	0	0	0	0	0	0	0
227	DIPIRONA IV						0	0	0	0	0	0	0	0	0	0
227	METOCLOPRAMIDA IV						0	0	0	0	0	0	0	0	0	0
227	CEFAZOLINA IV						0	0	0	0	0	0	0	0	0	0
228	ENOXAPARINA IV			1			0	0	0	0	0	0	0	0	0	0
228	PREDNISONA IV		1	1			0	0	0	0	0	0	0	0	0	0
228	ACIDO ACETILSALICILICO		1	1			0	0	0	0	0	0	0	0	0	0
228	SULFATO FERROSO						0	0	0	0	0	0	0	0	0	0
228	ACIDO FOLICO						0	0	0	0	0	0	0	0	0	0
228	RANITIDINA IV	1					0	0	0	0	0	0	0	0	0	0
228	DIPIRONA			1			0	0	0	0	0	0	0	0	0	0
228	INSULINA REGULAR		1				0	0	0	0	0	0	0	0	0	0
228	INSULINA NPH		1				0	0	0	0	0	0	0	0	0	0
228	ONDASETRONA IV			1			0	0	0	0	0	0	0	0	0	0
228	HIDROXICLOROQUINA			1			0	0	0	0	0	0	0	0	0	0
229	BETAMETASONA IM						0	0	0	0	0	0	0	0	0	0
229	ESCOPOLAMINA						0	0	0	0	0	0	0	0	0	0
229	SULFATO FERROSO						0	0	0	0	0	0	0	0	0	0
230	CAPTOPRIL		1				0	0	0	0	0	0	0	0	0	0
230	SIMETICONA						0	0	0	0	0	0	0	0	0	0
230	DIPIRONA		1				0	0	0	0	0	0	0	0	0	0
230	NIFEDIPINO						0	0	0	0	0	0	0	0	0	0
230	PROPRANOLOL		1				0	0	0	0	0	0	0	0	0	0
231	DIPIRONA						0	0	0	0	0	0	0	0	0	0
231	SIMETICONA						0	0	0	0	0	0	0	0	0	0
232	HIDRALAZINA IV						0	0	0	0	0	0	0	0	0	0
232	INSULINA NPH		1				0	0	0	0	0	0	0	0	0	0
232	INSULINA REGULAR		1				0	0	0	0	0	0	0	0	0	0
232	METILDOPA						0	0	0	0	0	0	0	0	0	0
233	ESCOPOLAMINA						0	0	0	0	0	0	0	0	0	0
233	HIDRALAZINA IV		1				0	0	0	0	0	0	0	0	0	0
233	METILDOPA						0	0	0	0	0	0	0	0	0	0
234	DIPIRONA		1				0	0	0	0	0	0	0	0	0	0
234	HIDRALAZINA IV		1				0	0	0	0	0	0	0	0	0	0
234	INSULINA REGULAR		1				0	0	0	0	0	0	0	0	0	0
234	METILDOPA		1				0	0	0	0	0	0	0	0	0	0
234	NIFEDIPINO						0	0	0	0	0	0	0	0	0	0
234	CEFALEXINA						0	0	0	0	0	0	0	0	0	0
234	CAPTOPRIL		1				0	0	0	0	0	0	0	0	0	0
234	SIMETICONA						0	0	0	0	0	0	0	0	0	0
234	SULFATO FERROSO		1				0	0	0	0	0	0	0	0	0	0
234	PROPRANOLOL		1				0	0	0	0	0	0	0	0	0	0
234	LEVOMEPROMAZINA						0	0	0	0	0	0	0	0	0	0
235	DIPIRONA CAFEINA						0	0	0	0	0	0	0	0	0	0
236	CAPTOPRIL						0	0	0	0	0	0	0	0	0	0
236	SIMETICONA						0	0	0	0	0	0	0	0	0	0
236	DIPIRONA						0	0	0	0	0	0	0	0	0	0
236	NIFEDIPINO						0	0	0	0	0	0	0	0	0	0
236	SULFATO FERROSO						0	0	0	0	0	0	0	0	0	0
237	SIMETICONA						0	0	0	0	0	0	0	0	0	0
237	DIPIRONA						0	0	0	0	0	0	0	0	0	0
238	CAPTOPRIL		1				0	0	0	0	0	0	0	0	0	0
238	SULFATO DE MAGNESIO IV						0	0	0	0	0	0	0	0	0	0
238	SIMETICONA						0	0	0	0	0	0	0	0	0	0
238	DIPIRONA		1				0	0	0	0	0	0	0	0	0	0
239	SIMETICONA						0	0	0	0	0	0	0	0	0	0
239	DIPIRONA						0	0	0	0	0	0	0	0	0	0
239	INSULINA NPH		1				0	0	0	0	0	0	0	0	0	0
239	INSULINA REGULAR		1				0	0	0	0	0	0	0	0	0	0
239	NIFEDIPINO						0	0	0	0	0	0	0	0	0	0
239	SULFATO FERROSO						0	0	0	0	0	0	0	0	0	0
240	CAPTOPRIL		1				0	0	0	0	0	0	0	0	0	0
240	DIPIRONA		1				0	0	0	0	0	0	0	0	0	0
240	HIDROCLOROTIAZIDA		1				0	0	0	0	0	0	0	0	0	0
240	INSULINA NPH		1				0	0	0	0	0	0	0	0	0	0
240	INSULINA REGULAR		1				0	0	0	0	0	0	0	0	0	0
240	NIFEDIPINO						0	0	0	0	0	0	0	0	0	0
240	CLINDAMICINA						0	0	0	0	0	0	0	0	0	0
240	SULFATO FERROSO						0	0	0	0	0	0	0	0	0	0
241	SULFATO FERROSO						0	0	0	0	0	0	0	0	0	0
241	METOCLOPRAMIDA IV						0	0	0	0	0	0	0	0	0	0
241	DIPIRONA IV		1				0	0	0	0	0	0	0	0	0	0
241	OCITOCINA						0	0	0	0	0	0	0	0	0	0
241	CAPTOPRIL		1				0	0	0	0	0	0	0	0	0	0
241	SIMETICONA						0	0	0	0	0	0	0	0	0	0
242	ESCOPOLAMINA						0	0	0	0	0	0	0	0	0	0
242	DIPIRONA						0	0	0	0	0	0	0	0	0	0
242	HIDRALAZINA IV						0	0	0	0	0	0	0	0	0	0
242	METILDOPA						0	0	0	0	0	0	0	0	0	0
243	METILDOPA				1	SONOLÊNCIA	0	0	0	0	0	1	0	0	0	1
243	HIDRALAZINA IV						0	0	0	0	0	0	0	0	0	0
243	LEVOMEPROMAZINA						0	0	0	0	0	0	0	0	0	0
243	NIFEDIPINO						0	0	0	0	0	0	0	0	0	0
244	BETAMETASONA IM			1			0	0	0	0	0	0	0	0	0	0
244	DIPIRONA			1			0	0	0	0	0	0	0	0	0	0
244	HIDRALAZINA IV						0	0	0	0	0	0	0	0	0	0
244	METILDOPA						0	0	0	0	0	0	0	0	0	0
244	NISTATINA VAGINAL						0	0	0	0	0	0	0	0	0	0
244	CARBOCISTEINA						0	0	0	0	0	0	0	0	0	0
244	LEVOMEPROMAZINA						0	0	0	0	0	0	0	0	0	0
244	DIMETICONA						0	0	0	0	0	0	0	0	0	0
244	CLINDAMICINA IV				1	DIARRÉIA	0	0	0	0	1	0	0	0	0	1
244	GENTAMICINA IV				1	NAÚSEAS	0	0	0	0	1	0	0	0	0	1
244	OLEO MINERAL						0	0	0	0	0	0	0	0	0	0
245	BETAMETASONA IM			1			0	0	0	0	0	0	0	0	0	0
245	DIPIRONA IV			1			0	0	0	0	0	0	0	0	0	0
245	ESCOPOLAMINA IV						0	0	0	0	0	0	0	0	0	0
245	NIFEDIPINO						0	0	0	0	0	0	0	0	0	0
245	CEFAZOLINA IV						0	0	0	0	0	0	0	0	0	0
245	CEFTRIAXONA IV						0	0	0	0	0	0	0	0	0	0
246	CAPTOPRIL		1		1	TOSSE	0	1	0	0	0	0	0	0	0	1
246	SIMETICONA						0	0	0	0	0	0	0	0	0	0
246	DIPIRONA		1				0	0	0	0	0	0	0	0	0	0
246	NIFEDIPINO						0	0	0	0	0	0	0	0	0	0
247	CEFTRIAXONA IV						0	0	0	0	0	0	0	0	0	0
247	ESCOPOLAMINA						0	0	0	0	0	0	0	0	0	0
247	DIPIRONA						0	0	0	0	0	0	0	0	0	0
247	FENOTEROL						0	0	0	0	0	0	0	0	0	0
248	BETAMETASONA IM		1	1			0	0	0	0	0	0	0	0	0	0
248	ESCOPOLAMINA						0	0	0	0	0	0	0	0	0	0
248	DIPIRONA		1	1			0	0	0	0	0	0	0	0	0	0
248	FENOBARBITAL		1	1			0	0	0	0	0	0	0	0	0	0
248	CAPTOPRIL		1				0	0	0	0	0	0	0	0	0	0
248	SIMETICONA						0	0	0	0	0	0	0	0	0	0
248	NIFEDIPINO			1			0	0	0	0	0	0	0	0	0	0
249	BETAMETASONA IM			1			0	0	0	0	0	0	0	0	0	0
249	NIFEDIPINO						0	0	0	0	0	0	0	0	0	0
249	ESCOPOLAMINA						0	0	0	0	0	0	0	0	0	0
249	DIPIRONA			1			0	0	0	0	0	0	0	0	0	0
249	OLEO MINERAL						0	0	0	0	0	0	0	0	0	0
249	RANITIDINA						0	0	0	0	0	0	0	0	0	0
250	CAPTOPRIL		1				0	0	0	0	0	0	0	0	0	0
250	SIMETICONA						0	0	0	0	0	0	0	0	0	0
250	DIPIRONA		1				0	0	0	0	0	0	0	0	0	0
250	NIFEDIPINO						0	0	0	0	0	0	0	0	0	0
251	BETAMETASONA IM						0	0	0	0	0	0	0	0	0	0
251	ESCOPOLAMINA						0	0	0	0	0	0	0	0	0	0
251	NIFEDIPINO						0	0	0	0	0	0	0	0	0	0
252	DIMETICONA						0	0	0	0	0	0	0	0	0	0
252	CABERGOLINA						0	0	0	0	0	0	0	0	0	0
252	DIPIRONA						0	0	0	0	0	0	0	0	0	0
252	NIFEDIPINO						0	0	0	0	0	0	0	0	0	0
252	NORIPURUM						0	0	0	0	0	0	0	0	0	0
253	BETAMETASONA IM			1			0	0	0	0	0	0	0	0	0	0
253	DIPIRONA IV			1			0	0	0	0	0	0	0	0	0	0
253	ENOXAPARINA IV			1			0	0	0	0	0	0	0	0	0	0
254	ESCOPOLAMINA						0	0	0	0	0	0	0	0	0	0
255	BETAMETASONA IM						0	0	0	0	0	0	0	0	0	0
255	HIDRALAZINA IV						0	0	0	0	0	0	0	0	0	0
256	ESCOPOLAMINA						0	0	0	0	0	0	0	0	0	0
256	NIFEDIPINO						0	0	0	0	0	0	0	0	0	0
257	CAPTOPRIL						0	0	0	0	0	0	0	0	0	0
257	NIFEDIPINO						0	0	0	0	0	0	0	0	0	0
257	PARACETAMOL						0	0	0	0	0	0	0	0	0	0
258	HIDRALAZINA IV						0	0	0	0	0	0	0	0	0	0
258	METILDOPA						0	0	0	0	0	0	0	0	0	0
259	CAPTOPRIL		1				0	0	0	0	0	0	0	0	0	0
259	SIMETICONA						0	0	0	0	0	0	0	0	0	0
259	DIPIRONA		1	1			0	0	0	0	0	0	0	0	0	0
259	NIFEDIPINO			1			0	0	0	0	0	0	0	0	0	0
259	SULFATO FERROSO						0	0	0	0	0	0	0	0	0	0
259	EXCEDRINS		1	1	1	NÁUSEA	0	0	0	0	1	0	0	0	0	1
259	PREDNISONA		1	1			0	0	0	0	0	0	0	0	0	0
260	GLICOSE						0	0	0	0	0	0	0	0	0	0
260	HIDRALAZINA IV						0	0	0	0	0	0	0	0	0	0
260	INSULINA NPH		1				0	0	0	0	0	0	0	0	0	0
260	INSULINA REGULAR		1				0	0	0	0	0	0	0	0	0	0
260	CAPTOPRIL		1				0	0	0	0	0	0	0	0	0	0
260	SIMETICONA						0	0	0	0	0	0	0	0	0	0
260	DIPIRONA		1				0	0	0	0	0	0	0	0	0	0
260	NIFEDIPINO						0	0	0	0	0	0	0	0	0	0
260	SULFATO FERROSO						0	0	0	0	0	0	0	0	0	0
261	ESCOPOLAMINA						0	0	0	0	0	0	0	0	0	0
261	DIPIRONA						0	0	0	0	0	0	0	0	0	0
261	NIFEDIPINO						0	0	0	0	0	0	0	0	0	0
262	CEFTRIAXONA IV						0	0	0	0	0	0	0	0	0	0
262	ESCOPOLAMINA IV						0	0	0	0	0	0	0	0	0	0
262	PENICILINA BENZATINA						0	0	0	0	0	0	0	0	0	0
263	DIPIRONA IV						0	0	0	0	0	0	0	0	0	0
264	CEFAZOLINA IV						0	0	0	0	0	0	0	0	0	0
264	CAPTOPRIL		1				0	0	0	0	0	0	0	0	0	0
264	DIMETICONA						0	0	0	0	0	0	0	0	0	0
264	DIPIRONA		1				0	0	0	0	0	0	0	0	0	0
264	SULFATO FERROSO				1	NÁUSEA	0	0	0	0	1	0	0	0	0	1
264	CEFALEXINA						0	0	0	0	0	0	0	0	0	0
264	OLEO MINERAL						0	0	0	0	0	0	0	0	0	0
264	NIFEDIPINO						0	0	0	0	0	0	0	0	0	0
265	SIMETICONA						0	0	0	0	0	0	0	0	0	0
265	DIPIRONA			1			0	0	0	0	0	0	0	0	0	0
265	ENOXAPARINA IV			1			0	0	0	0	0	0	0	0	0	0
265	VARFARINA			1			0	0	0	0	0	0	0	0	0	0
266	CAPTOPRIL		1		1	TOSSE	0	1	0	0	0	0	0	0	0	1
266	SIMETICONA						0	0	0	0	0	0	0	0	0	0
266	DIPIRONA		1	1			0	0	0	0	0	0	0	0	0	0
266	OLEO MINERAL						0	0	0	0	0	0	0	0	0	0
266	NIFEDIPINO RETARD						0	0	0	0	0	0	0	0	0	0
266	HIDROCLOROTIAZIDA		1	1			0	0	0	0	0	0	0	0	0	0
266	FUROSEMIDA IV		1	1			0	0	0	0	0	0	0	0	0	0
266	PROPRANOLOL		1				0	0	0	0	0	0	0	0	0	0
267	ESCOPOLAMINA						0	0	0	0	0	0	0	0	0	0
267	DIPIRONA		1	1			0	0	0	0	0	0	0	0	0	0
267	INSULINA NPH		1				0	0	0	0	0	0	0	0	0	0
267	INSULINA REGULAR		1				0	0	0	0	0	0	0	0	0	0
267	METILDOPA		1		1	SONOLÊNCIA	0	0	0	0	0	1	0	0	0	1
267	NIFEDIPINO						0	0	0	0	0	0	0	0	0	0
267	BETAMETASONA IM			1			0	0	0	0	0	0	0	0	0	0
267	GLICOSE						0	0	0	0	0	0	0	0	0	0
267	RANITIDINA						0	0	0	0	0	0	0	0	0	0
267	CAPTOPRIL		1				0	0	0	0	0	0	0	0	0	0
267	DIMETICONA						0	0	0	0	0	0	0	0	0	0
267	SULFATO FERROSO		1				0	0	0	0	0	0	0	0	0	0
268	CEFTRIAXONA IV				1	DIARRÉIA	0	0	0	0	1	0	0	0	0	1
268	BETAMETASONA IM						0	0	0	0	0	0	0	0	0	0
268	ESCOPOLAMINA						0	0	0	0	0	0	0	0	0	0
268	OLEO MINERAL						0	0	0	0	0	0	0	0	0	0
269	BETAMETASONA IM			1	1	TONTURA	0	0	0	0	0	1	0	0	0	1
269	ESCOPOLAMINA						0	0	0	0	0	0	0	0	0	0
269	DIPIRONA			1			0	0	0	0	0	0	0	0	0	0
269	NIFEDIPINO						0	0	0	0	0	0	0	0	0	0
270	INSULINA REGULAR						0	0	0	0	0	0	0	0	0	0
270	CAPTOPRIL		1				0	0	0	0	0	0	0	0	0	0
270	DIMETICONA						0	0	0	0	0	0	0	0	0	0
270	METILDOPA				1	SONOLÊNCIA	0	0	0	0	0	1	0	0	0	1
270	CEFAZOLINA IV						0	0	0	0	0	0	0	0	0	0
270	DIPIRONA		1				0	0	0	0	0	0	0	0	0	0
270	ESCOPOLAMINA				1	VISÃO TURVA, TONTURA	0	0	0	0	0	1	1	0	0	2
270	HIDRALAZINA IV						0	0	0	0	0	0	0	0	0	0
270	NIFEDIPINO						0	0	0	0	0	0	0	0	0	0
270	OLEO MINERAL						0	0	0	0	0	0	0	0	0	0
271	HIDRALAZINA IV						0	0	0	0	0	0	0	0	0	0
271	INSULINA NPH		1				0	0	0	0	0	0	0	0	0	0
271	INSULINA REGULAR		1				0	0	0	0	0	0	0	0	0	0
271	METILDOPA						0	0	0	0	0	0	0	0	0	0
271	MISOPROSTOL						0	0	0	0	0	0	0	0	0	0
272	DIPIRONA IV			1			0	0	0	0	0	0	0	0	0	0
272	PREDNISONA			1			0	0	0	0	0	0	0	0	0	0
272	OXIGENIO						0	0	0	0	0	0	0	0	0	0
272	ACIDO FOLICO						0	0	0	0	0	0	0	0	0	0
272	DIMETICONA						0	0	0	0	0	0	0	0	0	0
272	RANITIDINA						0	0	0	0	0	0	0	0	0	0
272	NISTATINA VV						0	0	0	0	0	0	0	0	0	0
273	CEFTRIAXONA IV				1	DIARRÉIA	0	0	0	0	1	0	0	0	0	1
273	DIPIRONA						0	0	0	0	0	0	0	0	0	0
273	OLEO MINERAL						0	0	0	0	0	0	0	0	0	0
274	DIPIRONA						0	0	0	0	0	0	0	0	0	0
274	HIDRALAZINA IV						0	0	0	0	0	0	0	0	0	0
275	CAPTOPRIL						0	0	0	0	0	0	0	0	0	0
275	SIMETICONA						0	0	0	0	0	0	0	0	0	0
275	NIFEDIPINO						0	0	0	0	0	0	0	0	0	0
275	NIFEDIPINO RETARD						0	0	0	0	0	0	0	0	0	0
275	SULFATO FERROSO						0	0	0	0	0	0	0	0	0	0
276	ENOXAPARINA IV			1			0	0	0	0	0	0	0	0	0	0
276	DIPIRONA			1			0	0	0	0	0	0	0	0	0	0
277	CEFAZOLINA IV						0	0	0	0	0	0	0	0	0	0
277	DIPIRONA IV						0	0	0	0	0	0	0	0	0	0
277	RANITIDINA						0	0	0	0	0	0	0	0	0	0
277	SULFATO FERROSO				1	NAÚSEA	0	0	0	0	1	0	0	0	0	1
277	ACIDO FOLICO						0	0	0	0	0	0	0	0	0	0
278	CAPTOPRIL		1				0	0	0	0	0	0	0	0	0	0
278	SIMETICONA						0	0	0	0	0	0	0	0	0	0
278	DIPIRONA		1				0	0	0	0	0	0	0	0	0	0
278	SULFATO FERROSO						0	0	0	0	0	0	0	0	0	0
279	HIDRALAZINA IV						0	0	0	0	0	0	0	0	0	0
279	METILDOPA						0	0	0	0	0	0	0	0	0	0
279	NIFEDIPINO						0	0	0	0	0	0	0	0	0	0
279	CAPTOPRIL		1				0	0	0	0	0	0	0	0	0	0
279	DIPIRONA		1				0	0	0	0	0	0	0	0	0	0
279	OLEO MINERAL						0	0	0	0	0	0	0	0	0	0
280	ACIDO FOLICO						0	0	0	0	0	0	0	0	0	0
280	CAPTOPRIL		1				0	0	0	0	0	0	0	0	0	0
280	DIPIRONA		1	1			0	0	0	0	0	0	0	0	0	0
280	HIDROCLOROTIAZIDA		1	1			0	0	0	0	0	0	0	0	0	0
280	INSULINA NPH		1		1	HIPOGLICEMIA	1	0	0	0	0	0	0	0	0	1
280	INSULINA REGULAR		1				0	0	0	0	0	0	0	0	0	0
280	SULFATO FERROSO						0	0	0	0	0	0	0	0	0	0
280	CLINDAMICINA						0	0	0	0	0	0	0	0	0	0
281	CEFTRIAXONA IV						0	0	0	0	0	0	0	0	0	0
281	ACIDO FOLICO						0	0	0	0	0	0	0	0	0	0
281	ESCOPOLAMINA						0	0	0	0	0	0	0	0	0	0
281	RANITIDINA						0	0	0	0	0	0	0	0	0	0
281	ONDASETRONA IV						0	0	0	0	0	0	0	0	0	0
281	SULFATO FERROSO				1	NÁUSEAS	0	0	0	0	1	0	0	0	0	1
281	GLICOSE						0	0	0	0	0	0	0	0	0	0
281	CEFAZOLINA IV						0	0	0	0	0	0	0	0	0	0
282	BETAMETASONA IM			1			0	0	0	0	0	0	0	0	0	0
282	ESCOPOLAMINA				1	TAQUICARDIA	0	0	1	0	0	0	0	0	0	1
282	DIPIRONA			1			0	0	0	0	0	0	0	0	0	0
282	HIDRALAZINA IV						0	0	0	0	0	0	0	0	0	0
282	METILDOPA		1		1	SONOLÊNCIA	0	0	0	0	0	1	0	0	0	1
282	CEFTRIAXONA IV						0	0	0	0	0	0	0	0	0	0
282	SULFATO FERROSO		1				0	0	0	0	0	0	0	0	0	0
283	CEFTRIAXONA IV						0	0	0	0	0	0	0	0	0	0
283	BETAMETASONA IM						0	0	0	0	0	0	0	0	0	0
283	DIPIRONA IV						0	0	0	0	0	0	0	0	0	0
283	HIDRALAZINA IV						0	0	0	0	0	0	0	0	0	0
283	METILDOPA						0	0	0	0	0	0	0	0	0	0
283	NIFEDIPINO		1				0	0	0	0	0	0	0	0	0	0
283	MAGNESIO 50		1				0	0	0	0	0	0	0	0	0	0
283	CAPTOPRIL						0	0	0	0	0	0	0	0	0	0
283	SIMETICONA						0	0	0	0	0	0	0	0	0	0
283	DIMETICONA						0	0	0	0	0	0	0	0	0	0
284	HIDRALAZINA IV						0	0	0	0	0	0	0	0	0	0
284	METILDOPA						0	0	0	0	0	0	0	0	0	0
284	RANITIDINA						0	0	0	0	0	0	0	0	0	0
285	DIPIRONA						0	0	0	0	0	0	0	0	0	0
285	INSULINA NPH		1				0	0	0	0	0	0	0	0	0	0
285	INSULINA REGULAR		1				0	0	0	0	0	0	0	0	0	0
285	METILDOPA						0	0	0	0	0	0	0	0	0	0
285	NIFEDIPINO RETARD						0	0	0	0	0	0	0	0	0	0
286	CAPTOPRIL		1				0	0	0	0	0	0	0	0	0	0
286	NIFEDIPINO RETARD						0	0	0	0	0	0	0	0	0	0
286	HIDROCLOROTIAZIDA			1			0	0	0	0	0	0	0	0	0	0
286	DIPIRONA		1	1			0	0	0	0	0	0	0	0	0	0
286	ENOXAPARINA IV			1			0	0	0	0	0	0	0	0	0	0
286	ATENOLOL		1				0	0	0	0	0	0	0	0	0	0
286	LEVOMEPROMAZINA						0	0	0	0	0	0	0	0	0	0
287	IMIPENEM IV						0	0	0	0	0	0	0	0	0	0
287	CILASTATINA IV						0	0	0	0	0	0	0	0	0	0
287	ACIDO FOLICO						0	0	0	0	0	0	0	0	0	0
287	DIPIRONA						0	0	0	0	0	0	0	0	0	0
287	METOCLOPRAMIDA IV						0	0	0	0	0	0	0	0	0	0
287	RANITIDINA						0	0	0	0	0	0	0	0	0	0
287	SULFATO FERROSO						0	0	0	0	0	0	0	0	0	0
288	CAPTOPRIL		1				0	0	0	0	0	0	0	0	0	0
288	DIPIRONA		1	1			0	0	0	0	0	0	0	0	0	0
288	HIDROCLOROTIAZIDA IV		1	1			0	0	0	0	0	0	0	0	0	0
288	SULFATO FERROSO						0	0	0	0	0	0	0	0	0	0
288	SIMETICONA						0	0	0	0	0	0	0	0	0	0
289	CAPTOPRIL		1				0	0	0	0	0	0	0	0	0	0
289	SIMETICONA						0	0	0	0	0	0	0	0	0	0
289	DIPIRONA		1				0	0	0	0	0	0	0	0	0	0
289	INSULINA REGULAR		1				0	0	0	0	0	0	0	0	0	0
289	NIFEDIPINO						0	0	0	0	0	0	0	0	0	0
289	SULFATO FERROSO						0	0	0	0	0	0	0	0	0	0
290	BETAMETASONA IM						0	0	0	0	0	0	0	0	0	0
290	ESCOPOLAMINA						0	0	0	0	0	0	0	0	0	0
290	NIFEDIPINO						0	0	0	0	0	0	0	0	0	0
291	CAPTOPRIL		1				0	0	0	0	0	0	0	0	0	0
291	DIPIRONA		1				0	0	0	0	0	0	0	0	0	0
291	NIFEDIPINO						0	0	0	0	0	0	0	0	0	0
292	CEFTRIAXONA IV				1	DIARRÉIA	0	0	0	0	1	0	0	0	0	1
292	METRONIDAZOL						0	0	0	0	0	0	0	0	0	0
292	DIMETICONA						0	0	0	0	0	0	0	0	0	0
292	DIPIRONA						0	0	0	0	0	0	0	0	0	0
292	ESCOPOLAMINA						0	0	0	0	0	0	0	0	0	0
292	RANITIDINA						0	0	0	0	0	0	0	0	0	0
293	DIPIRONA IV						0	0	0	0	0	0	0	0	0	0
293	CEFTRIAXONA IV						0	0	0	0	0	0	0	0	0	0
293	TIAMINA						0	0	0	0	0	0	0	0	0	0
293	CARBAMAZEPINA						0	0	0	0	0	0	0	0	0	0
294	METILDOPA		1		1	SONOLÊNCIA	0	0	0	0	0	1	0	0	0	1
294	METOCLOPRAMIDA IV						0	0	0	0	0	0	0	0	0	0
294	PARACETAMOL						0	0	0	0	0	0	0	0	0	0
294	SULFATO FERROSO		1				0	0	0	0	0	0	0	0	0	0
294	HIDRALAZINA IV						0	0	0	0	0	0	0	0	0	0
295	CAPTOPRIL		1				0	0	0	0	0	0	0	0	0	0
295	SIMETICONA						0	0	0	0	0	0	0	0	0	0
295	DIPIRONA		1				0	0	0	0	0	0	0	0	0	0
295	NIFEDIPINO						0	0	0	0	0	0	0	0	0	0
296	DIMETICONA						0	0	0	0	0	0	0	0	0	0
296	DIPIRONA						0	0	0	0	0	0	0	0	0	0
296	INSULINA REGULAR						0	0	0	0	0	0	0	0	0	0
297	BETAMETASONA IM			1			0	0	0	0	0	0	0	0	0	0
297	ESCOPOLAMINA						0	0	0	0	0	0	0	0	0	0
297	DIPIRONA			1			0	0	0	0	0	0	0	0	0	0
298	ESCOPOLAMINA IV						0	0	0	0	0	0	0	0	0	0
299	CAPTOPRIL		1				0	0	0	0	0	0	0	0	0	0
299	SIMETICONA						0	0	0	0	0	0	0	0	0	0
299	DIPIRONA		1				0	0	0	0	0	0	0	0	0	0
299	INSULINA REGULAR		1				0	0	0	0	0	0	0	0	0	0
299	NIFEDIPINO						0	0	0	0	0	0	0	0	0	0
300	ESCOPOLAMINA						0	0	0	0	0	0	0	0	0	0
300	DIPIRONA						0	0	0	0	0	0	0	0	0	0
300	ONDASETRONA IV						0	0	0	0	0	0	0	0	0	0
300	RANITIDINA						0	0	0	0	0	0	0	0	0	0
300	OLEO MINERAL						0	0	0	0	0	0	0	0	0	0
300	METOCLOPRAMIDA IV						0	0	0	0	0	0	0	0	0	0
301	CEFALEXINA						0	0	0	0	0	0	0	0	0	0
301	DIPIRONA IV						0	0	0	0	0	0	0	0	0	0
301	ESCOPOLAMINA IV						0	0	0	0	0	0	0	0	0	0
302	SULFATO FERROSO				1	NAUSEAS MAL ESTAR ANSIA DE VOMITO	0	0	0	0	1	0	0	0	0	1
302	DIPIRONA IV						0	0	0	0	0	0	0	0	0	0
302	DIPIRONA						0	0	0	0	0	0	0	0	0	0
302	ESCOPOLAMINA IV				1	VISAO TURVA TONTURA LABIOS RESSECADOS BOCA SECA	0	0	0	0	1	0	1	0	0	2
302	CEFAZOLINA IV						0	0	0	0	0	0	0	0	0	0
302	SIMETICONA						0	0	0	0	0	0	0	0	0	0
302	CARBEGOLINA						0	0	0	0	0	0	0	0	0	0
303	ESCOPOLAMINA				1	RUBOR VERMELHIDAO NA FACE	0	0	0	0	0	0	0	1	0	1
303	OLEO MINERAL						0	0	0	0	0	0	0	0	0	0
303	SULFATO FERROSO						0	0	0	0	0	0	0	0	0	0
304	CEFAZOLINA IV						0	0	0	0	0	0	0	0	0	0
304	DIPIRONA IV						0	0	0	0	0	0	0	0	0	0
304	ESCOPOLAMINA IV				1	CONSTIPAÇAO	0	0	0	0	1	0	0	0	0	1
305	CEFTRIAXONA IV				1	FLEBITE	0	0	0	0	0	0	0	1	0	1
305	ACIDO FOLICO						0	0	0	0	0	0	0	0	0	0
305	AZITROMICINA						0	0	0	0	0	0	0	0	0	0
305	ACETILCISTEINA						0	0	0	0	0	0	0	0	0	0
305	SULFATO FERROSO						0	0	0	0	0	0	0	0	0	0
305	VILOMINA						0	0	0	0	0	0	0	0	0	0
305	FENOTEROL						0	0	0	0	0	0	0	0	0	0
306	CAPTOPRIL						0	0	0	0	0	0	0	0	0	0
306	SIMETICONA						0	0	0	0	0	0	0	0	0	0
306	DIPIRONA						0	0	0	0	0	0	0	0	0	0
306	NIFEDIPINO						0	0	0	0	0	0	0	0	0	0
307	ESCOPOLAMINA						0	0	0	0	0	0	0	0	0	0
307	DIPIRONA						0	0	0	0	0	0	0	0	0	0
307	HIDRALAZINA IV						0	0	0	0	0	0	0	0	0	0
307	METILDOPA				1	SONOLENCIA	0	0	0	0	0	1	0	0	0	1
308	ESCOPOLAMINA						0	0	0	0	0	0	0	0	0	0
308	NISTATINA IV						0	0	0	0	0	0	0	0	0	0
308	SULFATO FERROSO						0	0	0	0	0	0	0	0	0	0
309	ESCOPOLAMINA						0	0	0	0	0	0	0	0	0	0
309	DIPIRONA		1				0	0	0	0	0	0	0	0	0	0
309	CAPTOPRIL		1				0	0	0	0	0	0	0	0	0	0
309	HIDRALAZINA						0	0	0	0	0	0	0	0	0	0
309	METILDOPA				1	SONOLENCIA	0	0	0	0	0	1	0	0	0	1
309	SIMETICONA						0	0	0	0	0	0	0	0	0	0
309	INSULINA REGULAR		1				0	0	0	0	0	0	0	0	0	0
309	NIFEDIPINO						0	0	0	0	0	0	0	0	0	0
310	DIPIRONA						0	0	0	0	0	0	0	0	0	0
310	INSULINA REGULAR						0	0	0	0	0	0	0	0	0	0
310	SIMETICONA						0	0	0	0	0	0	0	0	0	0
311	METILDOPA				1	SONOLENCIA	0	0	0	0	0	1	0	0	0	1
311	NIFEDIPINO						0	0	0	0	0	0	0	0	0	0
311	ESCOPOLAMINA						0	0	0	0	0	0	0	0	0	0
311	DIPIRONA		1				0	0	0	0	0	0	0	0	0	0
311	HIDRALAZINA						0	0	0	0	0	0	0	0	0	0
311	INSULINA REGULAR		1				0	0	0	0	0	0	0	0	0	0
311	GLICOSE						0	0	0	0	0	0	0	0	0	0
311	CAPTOPRIL		1				0	0	0	0	0	0	0	0	0	0
311	SIMETICONA						0	0	0	0	0	0	0	0	0	0
312	CEFAZOLINA						0	0	0	0	0	0	0	0	0	0
312	DIPIRONA IV						0	0	0	0	0	0	0	0	0	0
313	CEFAZOLINA IV						0	0	0	0	0	0	0	0	0	0
313	ESCOPOLAMINA IV						0	0	0	0	0	0	0	0	0	0
313	PARACETAMOL						0	0	0	0	0	0	0	0	0	0
313	NISTATINA IV						0	0	0	0	0	0	0	0	0	0
313	MICONAZOL IV						0	0	0	0	0	0	0	0	0	0
314	BETAMETASONA IM			1			0	0	0	0	0	0	0	0	0	0
314	DIPIRONA IV			1			0	0	0	0	0	0	0	0	0	0
315	DIPIRONA		1	1			0	0	0	0	0	0	0	0	0	0
315	HIDRALAZINA IV						0	0	0	0	0	0	0	0	0	0
315	LEVOMEPROMAZINA						0	0	0	0	0	0	0	0	0	0
315	METILDOPA		1				0	0	0	0	0	0	0	0	0	0
315	PINDOLOL		1				0	0	0	0	0	0	0	0	0	0
315	NIFEDIPINO						0	0	0	0	0	0	0	0	0	0
315	CAPTOPRIL		1				0	0	0	0	0	0	0	0	0	0
315	OLEO MINERAL						0	0	0	0	0	0	0	0	0	0
315	BETAMETASONA IM			1			0	0	0	0	0	0	0	0	0	0
316	CAPTOPRIL		1				0	0	0	0	0	0	0	0	0	0
316	SIMETICONA						0	0	0	0	0	0	0	0	0	0
316	DIPIRONA		1				0	0	0	0	0	0	0	0	0	0
317	CAPTOPRIL		1				0	0	0	0	0	0	0	0	0	0
317	SIMETICONA						0	0	0	0	0	0	0	0	0	0
317	DIPIRONA		1				0	0	0	0	0	0	0	0	0	0
318	CAPTOPRIL		1				0	0	0	0	0	0	0	0	0	0
318	SIMETICONA						0	0	0	0	0	0	0	0	0	0
318	DIPIRONA		1				0	0	0	0	0	0	0	0	0	0
319	SIMETICONA						0	0	0	0	0	0	0	0	0	0
319	DIPIRONA						0	0	0	0	0	0	0	0	0	0
320	BETAMETASONA IM						0	0	0	0	0	0	0	0	0	0
321	BETAMETASONA IM						0	0	0	0	0	0	0	0	0	0
321	ESCOPOLAMINA						0	0	0	0	0	0	0	0	0	0
321	NIFEDIPINO						0	0	0	0	0	0	0	0	0	0
322	CAPTOPRIL		1				0	0	0	0	0	0	0	0	0	0
322	INSULINA REGULAR		1				0	0	0	0	0	0	0	0	0	0
322	CETOPROFENO		1				0	0	0	0	0	0	0	0	0	0
322	DIPIRONA		1				0	0	0	0	0	0	0	0	0	0
323	CEFTRIAXONA						0	0	0	0	0	0	0	0	0	0
323	BETAMETASONA IM						0	0	0	0	0	0	0	0	0	0
323	DIPIRONA IV						0	0	0	0	0	0	0	0	0	0
323	DIPIRONA VO						0	0	0	0	0	0	0	0	0	0
323	ESCOPOLAMINA						0	0	0	0	0	0	0	0	0	0
323	INSULINA REGULAR						0	0	0	0	0	0	0	0	0	0
324	CEFTRIAXONA IV						0	0	0	0	0	0	0	0	0	0
324	DIPIRONA IV						0	0	0	0	0	0	0	0	0	0
324	SULFATO FERROSO						0	0	0	0	0	0	0	0	0	0
324	ESCOPOLAMINA IV						0	0	0	0	0	0	0	0	0	0
325	SIMETICONA						0	0	0	0	0	0	0	0	0	0
325	DIPIRONA						0	0	0	0	0	0	0	0	0	0
325	CARBAMAZEPINA		1		1	SONOLENCIA	0	0	0	0	0	1	0	0	0	1
325	FENOBARBITAL		1				0	0	0	0	0	0	0	0	0	0
325	TOPIRANATO		1				0	0	0	0	0	0	0	0	0	0
326	NISTATINA						0	0	0	0	0	0	0	0	0	0
326	ESCOPOLAMINA						0	0	0	0	0	0	0	0	0	0
326	DIPIRONA						0	0	0	0	0	0	0	0	0	0
327	SIMETICONA						0	0	0	0	0	0	0	0	0	0
327	DIPIRONA						0	0	0	0	0	0	0	0	0	0
328	CEFALEXINA						0	0	0	0	0	0	0	0	0	0
328	METRONIDAZOL						0	0	0	0	0	0	0	0	0	0
328	BETAMETASONA IM						0	0	0	0	0	0	0	0	0	0
328	ESCOPOLAMINA						0	0	0	0	0	0	0	0	0	0
328	NIFEDIPINO						0	0	0	0	0	0	0	0	0	0
328	INSULINA REGULAR						0	0	0	0	0	0	0	0	0	0
328	INSULINA NPH						0	0	0	0	0	0	0	0	0	0
329	DIPIRONA						0	0	0	0	0	0	0	0	0	0
329	ESCOPOLAMINA						0	0	0	0	0	0	0	0	0	0
330	CEFAZOLINA IV						0	0	0	0	0	0	0	0	0	0
330	ESCOPOLAMINA						0	0	0	0	0	0	0	0	0	0
330	DIPIRONA						0	0	0	0	0	0	0	0	0	0
330	HIDRALAZINA IV						0	0	0	0	0	0	0	0	0	0
330	NIFEDIPINO						0	0	0	0	0	0	0	0	0	0
331	BETAMETASONA IM			1			0	0	0	0	0	0	0	0	0	0
331	DIPIRONA			1			0	0	0	0	0	0	0	0	0	0
331	ESCOPOLAMINA						0	0	0	0	0	0	0	0	0	0
331	HIDRALAZINA						0	0	0	0	0	0	0	0	0	0
331	NIFEDIPINO						0	0	0	0	0	0	0	0	0	0
332	DIPIRONA						0	0	0	0	0	0	0	0	0	0
332	INSULINA NPH						0	0	0	0	0	0	0	0	0	0
332	INSULINA REGULAR						0	0	0	0	0	0	0	0	0	0
332	HIDRALAZINA IV						0	0	0	0	0	0	0	0	0	0
332	RANITIDINA						0	0	0	0	0	0	0	0	0	0
332	METILDOPA				1	SONOLENCIA	0	0	0	0	0	1	0	0	0	1
333	BETAMETASONA IM			1			0	0	0	0	0	0	0	0	0	0
333	HIDRALAZINA IV						0	0	0	0	0	0	0	0	0	0
333	HIDRALAZINA						0	0	0	0	0	0	0	0	0	0
333	PINDOLOL		1		1	AUMENTO DAS TRANSAMINASES	0	0	0	0	0	0	0	0	1	1
333	NIFEDIPINO						0	0	0	0	0	0	0	0	0	0
333	CAPTOPRIL		1				0	0	0	0	0	0	0	0	0	0
333	DIPIRONA		1	1			0	0	0	0	0	0	0	0	0	0
333	SIMETICONA						0	0	0	0	0	0	0	0	0	0
333	LEVOMEPROMAZINA						0	0	0	0	0	0	0	0	0	0
334	BETAMETASONA IM			1			0	0	0	0	0	0	0	0	0	0
334	DIPIRONA IV			1			0	0	0	0	0	0	0	0	0	0
334	DIPIRONA			1			0	0	0	0	0	0	0	0	0	0
334	HIDRALAZINA						0	0	0	0	0	0	0	0	0	0
334	METILDOPA		1				0	0	0	0	0	0	0	0	0	0
334	SULFATO FERROSO		1				0	0	0	0	0	0	0	0	0	0
334	ESCOPOLAMINA IV				1	TAQUICARDIA ANSIA DE VOMITO	0	0	1	0	1	0	0	0	0	2
334	NIFEDIPINO						0	0	0	0	0	0	0	0	0	0
334	CAPTOPRIL		1				0	0	0	0	0	0	0	0	0	0
334	SIMETICONA						0	0	0	0	0	0	0	0	0	0
335	DIPIRONA IV						0	0	0	0	0	0	0	0	0	0
335	HIDRALAZINA IV						0	0	0	0	0	0	0	0	0	0
335	INSULINA REGULAR						0	0	0	0	0	0	0	0	0	0
335	METILDOPA		1				0	0	0	0	0	0	0	0	0	0
335	SULFATO FERROSO		1				0	0	0	0	0	0	0	0	0	0
336	DIPIRONA						0	0	0	0	0	0	0	0	0	0
336	ONDANSETRONA IV						0	0	0	0	0	0	0	0	0	0
336	SIMETICONA						0	0	0	0	0	0	0	0	0	0
336	ESCOPOLAMINA						0	0	0	0	0	0	0	0	0	0
337	CEFTRIAXONA IV						0	0	0	0	0	0	0	0	0	0
337	DIPIRONA IV			1			0	0	0	0	0	0	0	0	0	0
337	ESCOPOLAMINA IV						0	0	0	0	0	0	0	0	0	0
337	METRONIDAZOL IV						0	0	0	0	0	0	0	0	0	0
337	BETAMETASONA IM			1			0	0	0	0	0	0	0	0	0	0
337	NIFEDIPINO						0	0	0	0	0	0	0	0	0	0
338	PROGESTERONA						0	0	0	0	0	0	0	0	0	0
338	PARACETAMOL						0	0	0	0	0	0	0	0	0	0
338	INSULINA REGULAR						0	0	0	0	0	0	0	0	0	0
338	INSULINA NPH						0	0	0	0	0	0	0	0	0	0
339	CAPTOPRIL		1				0	0	0	0	0	0	0	0	0	0
339	DIPIRONA		1				0	0	0	0	0	0	0	0	0	0
340	BETAMETASONA IM						0	0	0	0	0	0	0	0	0	0
340	ESCOPOLAMINA						0	0	0	0	0	0	0	0	0	0
340	HIDRALAZINA IV						0	0	0	0	0	0	0	0	0	0
341	DIPIRONA IV			1			0	0	0	0	0	0	0	0	0	0
341	ESCOPOLAMINA IV						0	0	0	0	0	0	0	0	0	0
341	BETAMETASONA IM			1			0	0	0	0	0	0	0	0	0	0
341	SULFATO FERROSO						0	0	0	0	0	0	0	0	0	0
342	DIPIRONA						0	0	0	0	0	0	0	0	0	0
342	HIDRALAZINA IV						0	0	0	0	0	0	0	0	0	0
342	METILDOPA		1				0	0	0	0	0	0	0	0	0	0
342	SULFATO FERROSO		1				0	0	0	0	0	0	0	0	0	0
343	NIFEDIPINO						0	0	0	0	0	0	0	0	0	0
343	CAPTOPRIL		1				0	0	0	0	0	0	0	0	0	0
343	DIPIRONA		1				0	0	0	0	0	0	0	0	0	0
343	SIMETICONA						0	0	0	0	0	0	0	0	0	0
344	DIPIRONA IV						0	0	0	0	0	0	0	0	0	0
344	ESCOPOLAMINA IV				1	VISAO TURVA E TAQUICARDIA	0	0	1	0	0	0	1	0	0	2
344	NIFEDIPINO						0	0	0	0	0	0	0	0	0	0
344	METRONIDAZOL IV						0	0	0	0	0	0	0	0	0	0
345	CAPTOPRIL		1				0	0	0	0	0	0	0	0	0	0
345	SIMETICONA						0	0	0	0	0	0	0	0	0	0
345	INSULINA REGULAR		1				0	0	0	0	0	0	0	0	0	0
345	ISOMETEPTENO						0	0	0	0	0	0	0	0	0	0
345	CAFEINA						0	0	0	0	0	0	0	0	0	0
345	DIPIRONA IV		1				0	0	0	0	0	0	0	0	0	0
345	METILDOPA		1				0	0	0	0	0	0	0	0	0	0
345	HIDRALAZINA IV						0	0	0	0	0	0	0	0	0	0
345	SULFATO FERROSO		1				0	0	0	0	0	0	0	0	0	0
345	INSULINA NPH		1				0	0	0	0	0	0	0	0	0	0
346	SIMETICONA						0	0	0	0	0	0	0	0	0	0
346	DIPIRONA IV						0	0	0	0	0	0	0	0	0	0
346	TENOXICAM IV						0	0	0	0	0	0	0	0	0	0
346	TRAMADOL IV						0	0	0	0	0	0	0	0	0	0
346	NORIPURUM						0	0	0	0	0	0	0	0	0	0
347	CAPTOPRIL		1				0	0	0	0	0	0	0	0	0	0
347	SIMETICONA						0	0	0	0	0	0	0	0	0	0
347	DIPIRONA		1				0	0	0	0	0	0	0	0	0	0
348	CEFAZOLINA IV						0	0	0	0	0	0	0	0	0	0
348	DIPIRONA IV						0	0	0	0	0	0	0	0	0	0
348	ESCOPOLAMINA IV				1	VISAO TURVA VOMITO TONTURA TAQUICARDIA	0	0	1	0	1	1	1	0	0	4
348	INSULINA REGULAR						0	0	0	0	0	0	0	0	0	0
348	INSULINA NPH						0	0	0	0	0	0	0	0	0	0
348	METILDOPA		1				0	0	0	0	0	0	0	0	0	0
348	SULFATO FERROSO		1				0	0	0	0	0	0	0	0	0	0
349	BETAMETASONA IM			1			0	0	0	0	0	0	0	0	0	0
349	DIPIRONA IV			1			0	0	0	0	0	0	0	0	0	0
349	ESCOPOLAMINA IV						0	0	0	0	0	0	0	0	0	0
349	NIFEDIPINO						0	0	0	0	0	0	0	0	0	0
349	PROGESTERONA						0	0	0	0	0	0	0	0	0	0
350	BETAMETASONA IM						0	0	0	0	0	0	0	0	0	0
350	ESCOPOLAMINA IV						0	0	0	0	0	0	0	0	0	0
350	NIFEDIPINO						0	0	0	0	0	0	0	0	0	0
351	BETAMETASONA IM			1			0	0	0	0	0	0	0	0	0	0
351	DIPIRONA IV			1			0	0	0	0	0	0	0	0	0	0
351	ESCOPOLAMINA IV				1	VISAO TURVA	0	0	0	0	0	0	1	0	0	1
352	DIPIRONA IV						0	0	0	0	0	0	0	0	0	0
352	ESCOPOLAMINA IV				1	VISAO TURVA	0	0	0	0	0	0	1	0	0	1
352	HIDRALAZINA IV						0	0	0	0	0	0	0	0	0	0
352	NIFEDIPINO						0	0	0	0	0	0	0	0	0	0
353	CAPTOPRIL		1				0	0	0	0	0	0	0	0	0	0
353	DIPIRONA		1				0	0	0	0	0	0	0	0	0	0
353	SULFATO FERROSO						0	0	0	0	0	0	0	0	0	0
354	CAPTOPRIL		1				0	0	0	0	0	0	0	0	0	0
354	DIPIRONA		1				0	0	0	0	0	0	0	0	0	0
354	NIFEDIPINO						0	0	0	0	0	0	0	0	0	0
354	PROPANOLOL		1				0	0	0	0	0	0	0	0	0	0
354	LEVOMEPROMAZINA						0	0	0	0	0	0	0	0	0	0
355	CAPTOPRIL		1				0	0	0	0	0	0	0	0	0	0
355	SIMETICONA						0	0	0	0	0	0	0	0	0	0
355	DIPIRONA		1				0	0	0	0	0	0	0	0	0	0
355	LEVOMEPROMAZINA						0	0	0	0	0	0	0	0	0	0
355	NIFEDIPINO						0	0	0	0	0	0	0	0	0	0
356	ACIDO FOLICO						0	0	0	0	0	0	0	0	0	0
356	DIPIRONA						0	0	0	0	0	0	0	0	0	0
356	FENOBARBITAL		1				0	0	0	0	0	0	0	0	0	0
356	CARBAMAZEPINA		1				0	0	0	0	0	0	0	0	0	0
356	FENITOINA						0	0	0	0	0	0	0	0	0	0
356	SULFATO FERROSO		1				0	0	0	0	0	0	0	0	0	0
357	CEFTRIAXONA						0	0	0	0	0	0	0	0	0	0
357	DIPIRONA IV						0	0	0	0	0	0	0	0	0	0
357	ESCOPOLAMINA						0	0	0	0	0	0	0	0	0	0
357	SULFATO FERROSO						0	0	0	0	0	0	0	0	0	0
357	METOCLOPRAMIDA IV						0	0	0	0	0	0	0	0	0	0
358	GLICOSE						0	0	0	0	0	0	0	0	0	0
358	INSULINA REGULAR		1				0	0	0	0	0	0	0	0	0	0
358	METFORMINA		1				0	0	0	0	0	0	0	0	0	0
358	PARACETAMOL						0	0	0	0	0	0	0	0	0	0
358	INSULINA NPH		1				0	0	0	0	0	0	0	0	0	0
358	NISTATINA						0	0	0	0	0	0	0	0	0	0
358	ESCOPOLAMINA						0	0	0	0	0	0	0	0	0	0
359	CLINDAMICINA						0	0	0	0	0	0	0	0	0	0
359	GENTAMICINA						0	0	0	0	0	0	0	0	0	0
359	CAPTOPRIL		1				0	0	0	0	0	0	0	0	0	0
359	SIMETICONA						0	0	0	0	0	0	0	0	0	0
359	DIPIRONA IV		1				0	0	0	0	0	0	0	0	0	0
359	NIFEDIPINO						0	0	0	0	0	0	0	0	0	0
360	CAPTOPRIL		1				0	0	0	0	0	0	0	0	0	0
360	SIMETICONA						0	0	0	0	0	0	0	0	0	0
360	DIPIRONA		1				0	0	0	0	0	0	0	0	0	0
360	NIFEDIPINO						0	0	0	0	0	0	0	0	0	0
360	PARACETAMOL						0	0	0	0	0	0	0	0	0	0
361	ESCOPOLAMINA IV						0	0	0	0	0	0	0	0	0	0
361	GLICOSE						0	0	0	0	0	0	0	0	0	0
361	INSULINA REGULAR						0	0	0	0	0	0	0	0	0	0
361	METOCLOPRAMIDA IV						0	0	0	0	0	0	0	0	0	0
361	PARACETAMOL						0	0	0	0	0	0	0	0	0	0
362	ESCOPOLAMINA						0	0	0	0	0	0	0	0	0	0
362	SULFATO FERROSO						0	0	0	0	0	0	0	0	0	0
362	DIPIRONA						0	0	0	0	0	0	0	0	0	0
363	ESCOPOLAMINA				1	VISAO TURVA	0	0	0	0	0	0	1	0	0	1
363	DIPIRONA						0	0	0	0	0	0	0	0	0	0
363	HIDROXIDO DE ALUMINIO						0	0	0	0	0	0	0	0	0	0
363	RANITIDINA						0	0	0	0	0	0	0	0	0	0
364	METRONIDAZOL IV						0	0	0	0	0	0	0	0	0	0
364	ESCOPOLAMINA IV						0	0	0	0	0	0	0	0	0	0
364	NIFEDIPINO						0	0	0	0	0	0	0	0	0	0
364	PARACETAMOL						0	0	0	0	0	0	0	0	0	0
364	PROGESTERONA						0	0	0	0	0	0	0	0	0	0
365	DIPIRONA						0	0	0	0	0	0	0	0	0	0
365	INSULINA REGULAR						0	0	0	0	0	0	0	0	0	0
365	INSULINA NPH						0	0	0	0	0	0	0	0	0	0
366	DIPIRONA IV						0	0	0	0	0	0	0	0	0	0
366	ESCOPOLAMINA IV				1	SONOLENCIA CONSTIPAÇAO	0	0	0	0	0	0	0	0	0	0
366	HIDRALAZINA IV						0	0	0	0	1	1	0	0	0	2
366	METILDOPA		1		1	SONOLENCIA	0	0	0	0	0	1	0	0	0	1
366	TRAMADOL IV				1	SONOLENCIA CONSTIPAÇAO	0	0	0	0	1	1	0	0	0	2
366	SULFATO FERROSO		1				0	0	0	0	0	0	0	0	0	0
367	BETAMETASONA IM			1			0	0	0	0	0	0	0	0	0	0
367	ESCOPOLAMINA						0	0	0	0	0	0	0	0	0	0
367	DIPIRONA			1			0	0	0	0	0	0	0	0	0	0
367	INSULINA REGULAR						0	0	0	0	0	0	0	0	0	0
367	INSULINA NPH						0	0	0	0	0	0	0	0	0	0
367	NISTATINA CREME VAGINAL						0	0	0	0	0	0	0	0	0	0
368	ESCOPOLAMINA						0	0	0	0	0	0	0	0	0	0
368	DIPIRONA						0	0	0	0	0	0	0	0	0	0
368	NISTATINA IV						0	0	0	0	0	0	0	0	0	0
368	OLEO MINERAL						0	0	0	0	0	0	0	0	0	0
368	SULFATO FERROSO						0	0	0	0	0	0	0	0	0	0
368	PARACETAMOL						0	0	0	0	0	0	0	0	0	0
369	DIPIRONA		1				0	0	0	0	0	0	0	0	0	0
369	SOTALOL		1				0	0	0	0	0	0	0	0	0	0
370	CEFAZOLINA IV						0	0	0	0	0	0	0	0	0	0
370	DIPIRONA IV						0	0	0	0	0	0	0	0	0	0
371	DIPIRONA						0	0	0	0	0	0	0	0	0	0
371	HIDRALAZINA						0	0	0	0	0	0	0	0	0	0
371	METILDOPA				1	SONOLENCIA	0	0	0	0	1	0	0	0	0	1
372	BETAMETASONA IM			1			0	0	0	0	0	0	0	0	0	0
372	ESCOPOLAMINA						0	0	0	0	0	0	0	0	0	0
372	DIPIRONA			1			0	0	0	0	0	0	0	0	0	0
372	HIDRALAZINA IV						0	0	0	0	0	0	0	0	0	0
372	METILDOPA						0	0	0	0	0	0	0	0	0	0
372	NIFEDIPINO RETARD						0	0	0	0	0	0	0	0	0	0
373	ACIDO FOLICO						0	0	0	0	0	0	0	0	0	0
373	DIPIRONA			1			0	0	0	0	0	0	0	0	0	0
373	ENOXAPARINA			1			0	0	0	0	0	0	0	0	0	0
373	HIDRALAZINA IV						0	0	0	0	0	0	0	0	0	0
373	TIAMINA						0	0	0	0	0	0	0	0	0	0
373	SULFATO FERROSO						0	0	0	0	0	0	0	0	0	0
373	METOCLOPRAMIDA IV						0	0	0	0	0	0	0	0	0	0
373	VITAMINA B						0	0	0	0	0	0	0	0	0	0
373	DIPIRONA IV						0	0	0	0	0	0	0	0	0	0
373	PENICILINA G BENZATINA						0	0	0	0	0	0	0	0	0	0
374	BETAMETASONA IM			1			0	0	0	0	0	0	0	0	0	0
374	ESCOPOLAMINA						0	0	0	0	0	0	0	0	0	0
374	DIPIRONA			1			0	0	0	0	0	0	0	0	0	0
374	NIFEDIPINO						0	0	0	0	0	0	0	0	0	0
375	CAPTOPRIL		1				0	0	0	0	0	0	0	0	0	0
375	SIMETICONA						0	0	0	0	0	0	0	0	0	0
375	DIPIRONA		1				0	0	0	0	0	0	0	0	0	0
376	ESCOPOLAMINA						0	0	0	0	0	0	0	0	0	0
376	DIPIRONA						0	0	0	0	0	0	0	0	0	0
376	HIDRALAZINA						0	0	0	0	0	0	0	0	0	0
376	METILDOPA						0	0	0	0	0	0	0	0	0	0
376	NIFEDIPINO						0	0	0	0	0	0	0	0	0	0
376	RANITIDINA						0	0	0	0	0	0	0	0	0	0
377	BETAMETASONA IM			1			0	0	0	0	0	0	0	0	0	0
377	ESCOPOLAMINA						0	0	0	0	0	0	0	0	0	0
377	DIPIRONA			1			0	0	0	0	0	0	0	0	0	0
377	NIFEDIPINO						0	0	0	0	0	0	0	0	0	0
378	CAPTOPRIL		1				0	0	0	0	0	0	0	0	0	0
378	SIMETICONA						0	0	0	0	0	0	0	0	0	0
378	DIPIRONA		1				0	0	0	0	0	0	0	0	0	0
378	NIFEDIPINO			1			0	0	0	0	0	0	0	0	0	0
378	SULFATO FERROSO						0	0	0	0	0	0	0	0	0	0
378	CARBAMAZEPINA			1			0	0	0	0	0	0	0	0	0	0
379	METILDOPA						0	0	0	0	0	0	0	0	0	0
379	HIDRALAZINA IV						0	0	0	0	0	0	0	0	0	0
379	ESCOPOLAMINA IV						0	0	0	0	0	0	0	0	0	0
379	DIPIRONA						0	0	0	0	0	0	0	0	0	0
379	INSULINA REGULAR						0	0	0	0	0	0	0	0	0	0
379	METRONIDAZOL IV						0	0	0	0	0	0	0	0	0	0
380	CAPTOPRIL		1				0	0	0	0	0	0	0	0	0	0
380	SIMETICONA						0	0	0	0	0	0	0	0	0	0
380	DIPIRONA		1				0	0	0	0	0	0	0	0	0	0
381	CAPTOPRIL		1				0	0	0	0	0	0	0	0	0	0
381	SIMETICONA						0	0	0	0	0	0	0	0	0	0
381	DIPIRONA		1				0	0	0	0	0	0	0	0	0	0
382	BETAMETASONA IM						0	0	0	0	0	0	0	0	0	0
382	ESCOPOLAMINA IV						0	0	0	0	0	0	0	0	0	0
383	ESCOPOLAMINA IV						0	0	0	0	0	0	0	0	0	0
383	CARBAMAZEPINA						0	0	0	0	0	0	0	0	0	0
384	HIDRALAZINA IV						0	0	0	0	0	0	0	0	0	0
384	METILDOPA		1				0	0	0	0	0	0	0	0	0	0
384	DIPIRONA		1				0	0	0	0	0	0	0	0	0	0
384	CAPTOPRIL		1				0	0	0	0	0	0	0	0	0	0
384	NIFEDIPINO						0	0	0	0	0	0	0	0	0	0
384	SULFATO FERROSO		1				0	0	0	0	0	0	0	0	0	0
384	SIMETICONA						0	0	0	0	0	0	0	0	0	0
385	DIPIRONA						0	0	0	0	0	0	0	0	0	0
385	HIDRALAZINA						0	0	0	0	0	0	0	0	0	0
385	METILDOPA						0	0	0	0	0	0	0	0	0	0
385	CEFALEXINA						0	0	0	0	0	0	0	0	0	0
386	DIPIRONA						0	0	0	0	0	0	0	0	0	0
386	SULFATO FERROSO						0	0	0	0	0	0	0	0	0	0
386	SIMETICONA						0	0	0	0	0	0	0	0	0	0
387	CAPTOPRIL		1				0	0	0	0	0	0	0	0	0	0
387	DIPIRONA		1				0	0	0	0	0	0	0	0	0	0
387	PROPRANOLOL		1				0	0	0	0	0	0	0	0	0	0
387	HIDRALAZINA IV						0	0	0	0	0	0	0	0	0	0
387	NIFEDIPINO						0	0	0	0	0	0	0	0	0	0
387	SIMETICONA						0	0	0	0	0	0	0	0	0	0
388	DIPIRONA			1			0	0	0	0	0	0	0	0	0	0
388	SULFATO FERROSO						0	0	0	0	0	0	0	0	0	0
388	BETAMETASONA IM			1			0	0	0	0	0	0	0	0	0	0
389	CAPTOPRIL		1				0	0	0	0	0	0	0	0	0	0
389	SIMETICONA						0	0	0	0	0	0	0	0	0	0
389	DIPIRONA		1				0	0	0	0	0	0	0	0	0	0
389	LEVOMEPROMAZINA						0	0	0	0	0	0	0	0	0	0
390	CAPTOPRIL		1				0	0	0	0	0	0	0	0	0	0
390	SIMETICONA						0	0	0	0	0	0	0	0	0	0
390	DIPIRONA		1				0	0	0	0	0	0	0	0	0	0
390	NIFEDIPINO						0	0	0	0	0	0	0	0	0	0
390	NIFEDIPINO RETARD						0	0	0	0	0	0	0	0	0	0
390	LEVOMEPROMAZINA						0	0	0	0	0	0	0	0	0	0
391	DIPIRONA						0	0	0	0	0	0	0	0	0	0
391	NIFEDIPINO						0	0	0	0	0	0	0	0	0	0
391	SULFATO FERROSO						0	0	0	0	0	0	0	0	0	0
392	DIPIRONA IV						0	0	0	0	0	0	0	0	0	0
392	ESCOPOLAMINA IV						0	0	0	0	0	0	0	0	0	0
393	SIMETICONA						0	0	0	0	0	0	0	0	0	0
393	ESCOPOLAMINA IV						0	0	0	0	0	0	0	0	0	0
393	ONDANSETRONA IV		1				0	0	0	0	0	0	0	0	0	0
393	TRAMADOL IV		1				0	0	0	0	0	0	0	0	0	0
394	CAPTOPRIL		1				0	0	0	0	0	0	0	0	0	0
394	SIMETICONA						0	0	0	0	0	0	0	0	0	0
394	DIPIRONA		1				0	0	0	0	0	0	0	0	0	0
394	NIFEDIPINO						0	0	0	0	0	0	0	0	0	0
395	DIPIRONA						0	0	0	0	0	0	0	0	0	0
395	INSULINA REGULAR						0	0	0	0	0	0	0	0	0	0
396	BETAMETASONA IM			1			0	0	0	0	0	0	0	0	0	0
396	ESCOPOLAMINA IV						0	0	0	0	0	0	0	0	0	0
396	NIFEDIPINO						0	0	0	0	0	0	0	0	0	0
396	DIPIRONA IV			1			0	0	0	0	0	0	0	0	0	0
396	HIDRALAZINA IV						0	0	0	0	0	0	0	0	0	0
397	CEFALEXINA						0	0	0	0	0	0	0	0	0	0
397	DIPIRONA						0	0	0	0	0	0	0	0	0	0
397	HIDRALAZINA IV						0	0	0	0	0	0	0	0	0	0
397	INSULINA REGULAR						0	0	0	0	0	0	0	0	0	0
397	INSULINA NPH						0	0	0	0	0	0	0	0	0	0
397	ACICLOVIR						0	0	0	0	0	0	0	0	0	0
397	ACICLOVIR CREME						0	0	0	0	0	0	0	0	0	0
397	METILDOPA						0	0	0	0	0	0	0	0	0	0
398	HIDRALAZINA IV						0	0	0	0	0	0	0	0	0	0
398	INSULINA REGULAR						0	0	0	0	0	0	0	0	0	0
398	LEVOTIROXINA						0	0	0	0	0	0	0	0	0	0
398	METILDOPA						0	0	0	0	0	0	0	0	0	0
399	CAPTOPRIL		1	1	1	TOSSE SECA	0	1	0	0	0	0	0	0	0	1
399	SIMETICONA						0	0	0	0	0	0	0	0	0	0
399	DIPIRONA		1				0	0	0	0	0	0	0	0	0	0
399	DIPIRONA IV		1				0	0	0	0	0	0	0	0	0	0
399	LEVOMEPROMAZINA						0	0	0	0	0	0	0	0	0	0
399	PROPRANOLOL		1				0	0	0	0	0	0	0	0	0	0
399	IPRATROPIO						0	0	0	0	0	0	0	0	0	0
399	PENICILINA G BENZATINA						0	0	0	0	0	0	0	0	0	0
399	LOSARTANA		1	1			0	0	0	0	0	0	0	0	0	0
399	HIDRALAZINA IV		1				0	0	0	0	0	0	0	0	0	0
399	PINDOLOL		1				0	0	0	0	0	0	0	0	0	0
399	METILDOPA		1				0	0	0	0	0	0	0	0	0	0
399	METOCLOPRAMIDA IV						0	0	0	0	0	0	0	0	0	0
399	NIFEDIPINO						0	0	0	0	0	0	0	0	0	0
399	ESCOPOLAMINA						0	0	0	0	0	0	0	0	0	0
399	GLICOSE						0	0	0	0	0	0	0	0	0	0
400	ESCOPOLAMINA						0	0	0	0	0	0	0	0	0	0
401	DIPIRONA			1			0	0	0	0	0	0	0	0	0	0
401	PREDNISONA			1			0	0	0	0	0	0	0	0	0	0
401	SIMETICONA						0	0	0	0	0	0	0	0	0	0
401	SULFATO FERROSO						0	0	0	0	0	0	0	0	0	0
402	ESCOPOLAMINA						0	0	0	0	0	0	0	0	0	0
403	DIPIRONA						0	0	0	0	0	0	0	0	0	0
404	CAPTOPRIL						0	0	0	0	0	0	0	0	0	0
404	NISTATINA CREME						0	0	0	0	0	0	0	0	0	0
404	ESCOPOLAMINA						0	0	0	0	0	0	0	0	0	0
404	HIDRALAZINA						0	0	0	0	0	0	0	0	0	0
404	INSULINA REGULAR						0	0	0	0	0	0	0	0	0	0
404	METILDOPA				1	SONOLÊNCIA	0	0	0	0	0	1	0	0	0	1
404	NIFEDIPINO						0	0	0	0	0	0	0	0	0	0
405	CAPTOPRIL		1				0	0	0	0	0	0	0	0	0	0
405	NIFEDIPINO						0	0	0	0	0	0	0	0	0	0
405	DIPIRONA		1				0	0	0	0	0	0	0	0	0	0
405	LEVOMEPROMAZINA						0	0	0	0	0	0	0	0	0	0
405	NIFEDIPINO RETARD						0	0	0	0	0	0	0	0	0	0
406	CAPTOPRIL						0	0	0	0	0	0	0	0	0	0
406	CAPTOPRIL		1				0	0	0	0	0	0	0	0	0	0
406	DIMETICONA						0	0	0	0	0	0	0	0	0	0
406	DIPIRONA		1				0	0	0	0	0	0	0	0	0	0
406	IMUNOG. ANTIR						0	0	0	0	0	0	0	0	0	0
406	OLEO MINERAL						0	0	0	0	0	0	0	0	0	0
407	CEFAZOLINA						0	0	0	0	0	0	0	0	0	0
407	ESCOPOLAMINA				1	VISÃO TURVA	0	0	0	0	0	0	1	0	0	1
408	CAPTOPRIL		1				0	0	0	0	0	0	0	0	0	0
408	CETOPROFENO		1				0	0	0	0	0	0	0	0	0	0
408	DIPIRONA		1				0	0	0	0	0	0	0	0	0	0
408	NIFEDIPINO						0	0	0	0	0	0	0	0	0	0
409	CEFALEXINA						0	0	0	0	0	0	0	0	0	0
409	PARACETAMOL						0	0	0	0	0	0	0	0	0	0
409	CAPTOPRIL						0	0	0	0	0	0	0	0	0	0
409	SIMETICONA						0	0	0	0	0	0	0	0	0	0
409	RHOGAN*						0	0	0	0	0	0	0	0	0	0
410	CETOPROFENO			1			0	0	0	0	0	0	0	0	0	0
410	DIMETICONA						0	0	0	0	0	0	0	0	0	0
410	DIPIRONA			1			0	0	0	0	0	0	0	0	0	0
410	SULFATO FERROSO						0	0	0	0	0	0	0	0	0	0
411	CEFTRIAXONA						0	0	0	0	0	0	0	0	0	0
411	DIPIRONA						0	0	0	0	0	0	0	0	0	0
412	ESCOPOLAMINA						0	0	0	0	0	0	0	0	0	0
412	DIPIRONA						0	0	0	0	0	0	0	0	0	0
412	SULFATO FERROSO						0	0	0	0	0	0	0	0	0	0
412	CEFAZOLINA						0	0	0	0	0	0	0	0	0	0
412	NISTATINA						0	0	0	0	0	0	0	0	0	0
412	TRAMADOL						0	0	0	0	0	0	0	0	0	0
413	CAPTOPRIL		1				0	0	0	0	0	0	0	0	0	0
413	DIMETICONA						0	0	0	0	0	0	0	0	0	0
413	DIPIRONA		1				0	0	0	0	0	0	0	0	0	0
413	NIFEDIPINO						0	0	0	0	0	0	0	0	0	0
414	CAPTOPRIL		1				0	0	0	0	0	0	0	0	0	0
414	DIPIRONA		1				0	0	0	0	0	0	0	0	0	0
415	CEFEPIME						0	0	0	0	0	0	0	0	0	0
415	DIPIRONA						0	0	0	0	0	0	0	0	0	0
415	SULFATO FERROSO						0	0	0	0	0	0	0	0	0	0
415	PARACETAMOL						0	0	0	0	0	0	0	0	0	0
415	CEFTRIAXONA				1	DIARRÉIA	0	0	0	0	1	0	0	0	0	1
416	SIMETICONA						0	0	0	0	0	0	0	0	0	0
416	DIPIRONA						0	0	0	0	0	0	0	0	0	0
416	INSULINA REGULAR						0	0	0	0	0	0	0	0	0	0
416	NIFEDIPINO						0	0	0	0	0	0	0	0	0	0
417	ESCOPOLAMINA						0	0	0	0	0	0	0	0	0	0
417	DIPIRONA						0	0	0	0	0	0	0	0	0	0
417	HIDRALAZINA						0	0	0	0	0	0	0	0	0	0
417	SULFATO FERROSO		1				0	0	0	0	0	0	0	0	0	0
417	METILDOPA		1				0	0	0	0	0	0	0	0	0	0
418	CAPTOPRIL		1				0	0	0	0	0	0	0	0	0	0
418	DIPIRONA		1				0	0	0	0	0	0	0	0	0	0
418	INSULINA REGULAR		1				0	0	0	0	0	0	0	0	0	0
419	CEFAZOLINA						0	0	0	0	0	0	0	0	0	0
419	DIPIRONA						0	0	0	0	0	0	0	0	0	0
419	ESCOPOLAMINA						0	0	0	0	0	0	0	0	0	0
419	PENICILINA BENZATINA						0	0	0	0	0	0	0	0	0	0
420	ESCOPOLAMINA						0	0	0	0	0	0	0	0	0	0
420	ESCOPOLAMINA IV				1	VISÃO TURVA	0	0	0	0	0	0	1	0	0	1
420	NIFEDIPINO						0	0	0	0	0	0	0	0	0	0
420	DIPIRONA						0	0	0	0	0	0	0	0	0	0
421	BETAMETASONA IM			1			0	0	0	0	0	0	0	0	0	0
421	DIPIRONA IV			1			0	0	0	0	0	0	0	0	0	0
421	ESCOPOLAMINA IV				1	VISÃO TURVA/NÁUSEA/VÔMITO	0	0	0	0	1	0	1	0	0	2
421	TRAMADOL IV						0	0	0	0	0	0	0	0	0	0
421	OLEO MINERAL						0	0	0	0	0	0	0	0	0	0
422	ESCOPOLAMINA						0	0	0	0	0	0	0	0	0	0
422	GLICOSE 50% IV						0	0	0	0	0	0	0	0	0	0
422	DIPIRONA						0	0	0	0	0	0	0	0	0	0
422	METILDOPA						0	0	0	0	0	0	0	0	0	0
422	IPRATRÓPIO						0	0	0	0	0	0	0	0	0	0
422	FENOTEROL				1	TREMOR INTENSO	0	0	0	0	0	1	0	0	0	1
422	INSULINA REGULAR						0	0	0	0	0	0	0	0	0	0
422	HIDRALAZINA IV						0	0	0	0	0	0	0	0	0	0
423	SIMETICONA						0	0	0	0	0	0	0	0	0	0
423	DIPIRONA						0	0	0	0	0	0	0	0	0	0
423	INSULINA REGULAR		1				0	0	0	0	0	0	0	0	0	0
423	METFORMINA		1		1	DIARRÉIA/DOR DE BARRIGA	0	0	0	0	1	0	0	0	0	1
423	SULFATO FERROSO						0	0	0	0	0	0	0	0	0	0
423	GLICOSE 50% IV						0	0	0	0	0	0	0	0	0	0
423	INSULINA NPH		1				0	0	0	0	0	0	0	0	0	0
424	CEFTRIAXONA						0	0	0	0	0	0	0	0	0	0
424	METRONIDAZOL IV						0	0	0	0	0	0	0	0	0	0
424	CARBOCISTEÍNA						0	0	0	0	0	0	0	0	0	0
424	DIPIRONA						0	0	0	0	0	0	0	0	0	0
424	FENOTEROL IV						0	0	0	0	0	0	0	0	0	0
424	IPRATROPIO IV						0	0	0	0	0	0	0	0	0	0
424	SULFATO FERROSO						0	0	0	0	0	0	0	0	0	0
425	ESCOPOLAMINA IV						0	0	0	0	0	0	0	0	0	0
425	ESCOPOLAMINA						0	0	0	0	0	0	0	0	0	0
425	FLEET ENEMA						0	0	0	0	0	0	0	0	0	0
425	METOCLOPRAMIDA IV						0	0	0	0	0	0	0	0	0	0
425	CARBAMAZEPINA		1				0	0	0	0	0	0	0	0	0	0
425	RANITIDINA IV		1				0	0	0	0	0	0	0	0	0	0
425	FOSFATO DE POTÁSSIO MONOBÁSICO						0	0	0	0	0	0	0	0	0	0
426	CEFTRIAXONA						0	0	0	0	0	0	0	0	0	0
426	SIMETICONA						0	0	0	0	0	0	0	0	0	0
426	DIPIRONA IV			1			0	0	0	0	0	0	0	0	0	0
426	PREDNISONA			1			0	0	0	0	0	0	0	0	0	0
426	RANITIDINA						0	0	0	0	0	0	0	0	0	0
426	SULFATO FERROSO						0	0	0	0	0	0	0	0	0	0
427	BETAMETASONA IM			1			0	0	0	0	0	0	0	0	0	0
427	DIPIRONA IV			1			0	0	0	0	0	0	0	0	0	0
427	ESCOPOLAMINA IV						0	0	0	0	0	0	0	0	0	0
427	NEFEDIPINO						0	0	0	0	0	0	0	0	0	0
427	OLEO MINERAL						0	0	0	0	0	0	0	0	0	0
427	CEFTRIAXONA						0	0	0	0	0	0	0	0	0	0
[truncated: 3,293 more rows]
